# Supplementary material for: Comparison of Ambulatory Health Care Costs and Use Associated With Roux-en-Y Gastric Bypass vs Sleeve Gastrectomy
Source: PubMed Central journal article supplement (PMC9062690; doi:10.1001/jamanetworkopen.2022.9661), 2022-05-02
Supplement: jamanetwopen-e229661-s001.pdf [file jamanetwopen-e229661-s001.pdf]

## Supplemental Online Content

Lewis KH, Argetsinger S, Arterburn DE, et al. Comparison of ambulatory health care costs and use associated with Roux-en-Y gastric bypass vs sleeve gastrectomy. *JAMA Netw Open*. 2022;5(5):e229661. doi:10.1001/jamanetworkopen.2022.9661

**eTable 1.** Algorithm to Identify Outpatient Episodes in Claims Data from 2008 to 2017

**eTable 2.** Results from Multivariable Difference-in-Differences Analyses Comparing Patients Undergoing SG vs RYGB Between 2008 and 2016 Across Categories of Ambulatory Care Costs and Use With a Gamma Distribution

**eTable 3.** E-values and Interpretations for All Models with Statistically Significant Findings Comparing Patients Undergoing SG vs RYGB Between 2008 and 2016

**eFigure.** Flow Diagram for Cohort Selection of Patients with Index SG and RYGB Between 2008 and 2016

**eTable 4.** Attrition at Each Postoperative Year for Patients Undergoing SG or RYGB Between 2008 and 2016

**eTable 5.** Examining for Differential Attrition by Patient Characteristics: Baseline Characteristics of Patients in Main Analytic Cohort Enrolled at 1 and 4 Years After Surgery

**eTable 6.** Presurgery Characteristics of the Matched Main Cohort vs the Sensitivity Cohort of Patients With Index SG and RYGB Between 2008 and 2016

**eTable 7.** Results From Multivariable Difference-in-Differences Analyses Comparing Patients Undergoing SG vs RYGB Between 2008 and 2016 Across Categories of Ambulatory Care Costs and Use Among Those With 4 Years of Follow-up

**eTable 8.** Results From Multivariable Difference-in-Differences Analyses Comparing Patients Undergoing SG v. RYGB Between 2008 and 2016 Across Suboutcomes of Ambulatory Care Costs and Use Among Those With 4 Years of Follow-Up

**eTable 9.** Stata Outputs for All Models

**eTable 10.** Final Time Series Model After Backward Variable Selection for the Differenced Outcomes Between SG and RYGB

**eReferences.**

This supplemental material has been provided by the authors to give readers additional information about their work.

**eTable 1. Algorithm to Identify Outpatient Episodes in Claims Data from 2008 to 2017**

|                            |                                                                                                                                                                                                                                                                                                                                                                                                                                                                                                                                                                                                                                                                                                                                                                                                                                                                                                                                                                                                                                                                                                                                                                                                                                                                                                                                                                                                                                                                                                                                                                                                                                                                                                                                                                                                                                                                                                                                                                                                                                                                                                                                                                                                                                                                                                                                                                                                                                                                                                                                                                                                                                                                                                                                                                                                                                                                                    |
|----------------------------|------------------------------------------------------------------------------------------------------------------------------------------------------------------------------------------------------------------------------------------------------------------------------------------------------------------------------------------------------------------------------------------------------------------------------------------------------------------------------------------------------------------------------------------------------------------------------------------------------------------------------------------------------------------------------------------------------------------------------------------------------------------------------------------------------------------------------------------------------------------------------------------------------------------------------------------------------------------------------------------------------------------------------------------------------------------------------------------------------------------------------------------------------------------------------------------------------------------------------------------------------------------------------------------------------------------------------------------------------------------------------------------------------------------------------------------------------------------------------------------------------------------------------------------------------------------------------------------------------------------------------------------------------------------------------------------------------------------------------------------------------------------------------------------------------------------------------------------------------------------------------------------------------------------------------------------------------------------------------------------------------------------------------------------------------------------------------------------------------------------------------------------------------------------------------------------------------------------------------------------------------------------------------------------------------------------------------------------------------------------------------------------------------------------------------------------------------------------------------------------------------------------------------------------------------------------------------------------------------------------------------------------------------------------------------------------------------------------------------------------------------------------------------------------------------------------------------------------------------------------------------------|
| <p>Outpatient Episodes</p> | <p>The following logic was used to identify outpatient episodes in claims data<sup>a</sup>:</p> <ol style="list-style-type: none"> <li>1. We first restricted to claims that were not flagged as Emergency Department visits, Inpatient stays or Observation stays</li> <li>2. To define Office Visits:             <ol style="list-style-type: none"> <li>a. Narrowed down to claims that were flagged as either an office visit or face to face visit                 <ol style="list-style-type: none"> <li>i. Office visits include claims with the following CPT codes: 99201-99205, 99211-99215, 99241-99245, 99271-99275, 99321-99322, 99331-99333, 99341-99353, 99381-99387, 99391-99397, 99401-99404, 99411-99412, 99429, 99455-99456, 99483, 99495-99496</li> <li>ii. Face to face visits include claims with the following CPT codes: 99201-99215, 99217-99239, 99241-99255, 99281-99288, 99291-99292, 99304-99318, 99324-99337, 99339-99350, 99354-99429, 99441-99458, 99460-99463-99499</li> </ol> </li> <li>b. Office visits were separated into two subcategories, primary care provider (PCP) visits and specialist visits</li> <li>c. Categorized PCP visits as those that were flagged within a PROVCAT category of any PCP, adult PCP or pediatric PCP</li> <li>d. Categorized specialist visits as those that were flagged within a PROVCAT category of specialist or outpatient specialist</li> </ol> </li> <li>3. To define Laboratory visits:             <ol style="list-style-type: none"> <li>a. Claims with CPT codes 80047-89398 were categorized as Laboratory</li> <li>b. Pathology labs were excluded</li> <li>c. The remaining laboratory visits were separated into two subcategories, nutrition labs (e.g. iron, copper, vitamin B12, vitamin D) and all other labs (e.g. hematology, chemistry, microbiology, toxicology, endocrine) by a clinician on the team</li> </ol> </li> <li>4. To define Radiology visits             <ol style="list-style-type: none"> <li>a. Claims with CPT codes 70010-79999 were categorized as Radiology</li> <li>b. Radiology visits were separated by body site imaged into abdomen/pelvic imaging and all other imaging based on review of each procedure code</li> </ol> </li> <li>5. To define Pharmacy claims             <ol style="list-style-type: none"> <li>a. Pharmacy claims were separated into two subcategories, cardiometabolic prescription fills (including medications for T2D, hypertension, dyslipidemia) and all other prescription fill indications (including pain, mental illness, antimicrobials, etc.)</li> </ol> </li> <li>6. The remaining outpatient claims were categorized as Other and included claims for ambulatory procedures, durable medical equipment, vaccination, transport, facility-administered medications, and physical therapy/occupational therapy.</li> </ol> |
|----------------------------|------------------------------------------------------------------------------------------------------------------------------------------------------------------------------------------------------------------------------------------------------------------------------------------------------------------------------------------------------------------------------------------------------------------------------------------------------------------------------------------------------------------------------------------------------------------------------------------------------------------------------------------------------------------------------------------------------------------------------------------------------------------------------------------------------------------------------------------------------------------------------------------------------------------------------------------------------------------------------------------------------------------------------------------------------------------------------------------------------------------------------------------------------------------------------------------------------------------------------------------------------------------------------------------------------------------------------------------------------------------------------------------------------------------------------------------------------------------------------------------------------------------------------------------------------------------------------------------------------------------------------------------------------------------------------------------------------------------------------------------------------------------------------------------------------------------------------------------------------------------------------------------------------------------------------------------------------------------------------------------------------------------------------------------------------------------------------------------------------------------------------------------------------------------------------------------------------------------------------------------------------------------------------------------------------------------------------------------------------------------------------------------------------------------------------------------------------------------------------------------------------------------------------------------------------------------------------------------------------------------------------------------------------------------------------------------------------------------------------------------------------------------------------------------------------------------------------------------------------------------------------------|

eTable 1: Algorithm to Identify Outpatient Episodes in Claims Data from 2008-2017  
 a. Data were housed at the Harvard Pilgrim Health Care Institute and accessed by local team members using data security and credentialing processes in accordance with the data use agreement and local regulatory guidelines.

**eTable 2. Results from Multivariable Difference-in-Differences Analyses Comparing Patients Undergoing SG vs RYGB Between 2008 and 2016 Across Categories of Ambulatory Care Costs and Use With a Gamma Distribution**

|                             | Post-Operative Year 1, SG vs. RYGB             |                                               | Post-Operative Year 2, SG vs. RYGB  |                                     | Post-Operative Year 3, SG vs. RYGB             |                                               | Post-Operative Year 4, SG vs. RYGB |                                   | Post-Operative Year 1, SG vs. RYGB, gamma distribution |                                               | Post-Operative Year 2, SG vs. RYGB, gamma distribution |                                     | Post-Operative Year 3, SG vs. RYGB, gamma distribution |                                               | Post-Operative Year 4, SG vs. RYGB, gamma distribution |                                               |
|-----------------------------|------------------------------------------------|-----------------------------------------------|-------------------------------------|-------------------------------------|------------------------------------------------|-----------------------------------------------|------------------------------------|-----------------------------------|--------------------------------------------------------|-----------------------------------------------|--------------------------------------------------------|-------------------------------------|--------------------------------------------------------|-----------------------------------------------|--------------------------------------------------------|-----------------------------------------------|
|                             | Absolute Difference <sup>b</sup> (\$) (95% CI) | Relative Difference <sup>c</sup> (%) (95% CI) | Absolute Difference (\$) (95% CI)   | Relative Difference (%) (95% CI)    | Absolute Difference <sup>b</sup> (\$) (95% CI) | Relative Difference <sup>c</sup> (%) (95% CI) | Absolute Difference (\$) (95% CI)  | Relative Difference (%) (95% CI)  | Absolute Difference <sup>b</sup> (\$) (95% CI)         | Relative Difference <sup>c</sup> (%) (95% CI) | Absolute Difference (\$) (95% CI)                      | Relative Difference (%) (95% CI)    | Absolute Difference <sup>b</sup> (\$) (95% CI)         | Relative Difference <sup>c</sup> (%) (95% CI) | Absolute Difference <sup>b</sup> (\$) (95% CI)         | Relative Difference <sup>c</sup> (%) (95% CI) |
| Total Ambulatory Care Costs | -421.9 (-1334.1, 490.4)                        | -5.3% (-16.1%, 5.6%)                          | -642.9 (-1643.4, 357.5)             | -8.4% (-20.5%, 3.7%)                | -138.9 (-1273.2, 995.4)                        | -2.0% (-17.8%, 13.9%)                         | 382.8 (-1366.0, 2131.6)            | 5.1% (-19.2%, 29.5%)              | -425.8 (-1347.7, 496.0)                                | -5.3% (-16.1%, 5.6%)                          | -647.9 (-1661.0, 365.2)                                | -8.4% (-20.6%, 3.8%)                | -140.9 (-1289.3, 1007.5)                               | -2.0% (-17.9%, 13.9%)                         | 383.6 (-1379.5, 2146.6)                                | 5.1% (-19.3%, 29.4%)                          |
| Prescription Drug Costs     | 36.1 (-252.0, 324.3)                           | 1.7% (-11.9%, 15.2%)                          | 173.3 (-80.1, 426.7)                | 9.7% (-5.6%, 25.1%)                 | 140.2 (-283.0, 563.3)                          | 7.1% (-15.6%, 29.9%)                          | 852.8 <sup>f</sup> (395.6, 1310.0) | 52.4% <sup>e</sup> (17.8%, 87.0%) | 36.5 (-259.9, 332.9)                                   | 1.7% (-12.1%, 15.4%)                          | 175.9 (-86.0, 437.7)                                   | 9.8% (-5.9%, 25.4%)                 | 142.6 (-288.5, 573.7)                                  | 7.2% (-15.7%, 30.1%)                          | 861.1 <sup>f</sup> (392.9, 1329.3)                     | 52.2% <sup>e</sup> (17.0%, 87.4%)             |
| Office Visit Costs          | -36.7 (-103.5, 30.1)                           | -4.1% (-11.2%, 3.1%)                          | -14.4 (-85.4, 56.5)                 | -1.7% (-10.1%, 6.6%)                | -2.0 (-87.1, 83.1)                             | -0.3% (-11.1%, 10.6%)                         | -43.8 (-176.1, 88.5)               | -5.3% (-20.5%, 10.0%)             | -36.8 (-107.1, 33.4)                                   | -4.1% (-11.6%, 3.4%)                          | -14.4 (-86.9, 58.1)                                    | -1.7% (-10.2%, 6.8%)                | -2.1 (-89.3, 85.2)                                     | -0.3% (-11.3%, 10.8%)                         | -43.9 (-177.7, 89.8)                                   | -5.3% (-20.6%, 10.1%)                         |
| Laboratory Costs            | -118.9 <sup>d</sup> (-220.2, -17.5)            | -13.9% <sup>e</sup> (-24.2%, -3.6%)           | -107.6 <sup>d</sup> (-197.2, -18.1) | -15.9% <sup>e</sup> (-27.4%, -4.5%) | -106.7 (-244.5, 31.1)                          | -18.0% (-37.5%, 1.4%)                         | -4.0 (-116.7, 108.7)               | -0.8% (-23.6%, 22.0%)             | -118.9 <sup>d</sup> (-222.7, -15.1)                    | -13.8% <sup>d</sup> (-24.4%, -3.3%)           | -107.6 <sup>d</sup> (-200.4, -14.9)                    | -15.9% <sup>e</sup> (-27.7%, -4.1%) | -106.9 (-246.4, 32.6)                                  | -18.0% (-37.6%, 1.6%)                         | -3.9 (-117.9, 110.1)                                   | -0.8% (-23.7%, 22.2%)                         |
| Radiology Costs             | -4.6 (-97.7, 88.5)                             | -0.7% (-15.5%, 14.1%)                         | -63.6 (-189.7, 62.6)                | -9.2% (-26.0%, 7.6%)                | 6.7 (-121.7, 135.0)                            | 1.1% (-20.3%, 22.5%)                          | 22.5 (-150.8, 195.7)               | 3.4% (-23.7%, 30.6%)              | -4.7 (-100.5, 91.1)                                    | -0.7% (-15.9%, 14.4%)                         | -63.9 (-190.3, 62.5)                                   | -9.2% (-25.9%, 7.5%)                | 6.6 (-123.4, 136.6)                                    | 1.1% (-20.4%, 22.6%)                          | 22.7 (-151.4, 196.8)                                   | 3.4% (-23.6%, 30.5%)                          |
| All Other Outpatient Costs  | -264.7 (-945.4, 416.1)                         | -7.7% (-26.1%, 10.7%)                         | -600.9 (-1432.8, 231.0)             | -16.4% (-35.7%, 3.0%)               | -164.6 (-1103.8, 774.6)                        | -5.1% (-33.2%, 22.9%)                         | -537.1 (-1900.9, 826.7)            | -13.9% (-45.1%, 17.2%)            | -264.7 (-933.7, 404.4)                                 | -7.6% (-25.7%, 10.4%)                         | -600.9 (-1447.3, 245.5)                                | -16.3% (-35.9%, 3.4%)               | -165.4 (-1104.6, 773.8)                                | -5.1% (-33.0%, 22.7%)                         | -538.9 (-1909.4, 831.6)                                | -13.9% (-45.1%, 17.2%)                        |

**eTable 2: Results from Multivariable Difference-in-Differences Analyses<sup>a</sup> Comparing Patients Undergoing SG vs. RYGB Between 2008-2016 Across Categories of Ambulatory Care Costs & Use with a Gamma Distribution**

a. Difference-in-Differences analyses adjusting for all matched variables were used to generate between-group estimates for change in each outcome, at each time period, relative to a preoperative baseline period spanning months -24 to -13 before the index surgical date. We selected year -2 as the preoperative baseline for comparison because the year immediately before surgery represents a very high utilization time, due to pre-operative workup.

b. Absolute differences in each period refer to the estimated actual change in costs among SG patients minus that in RYGB patients in that segment versus baseline (months -24 to -13), accounting for all other periods.

c. Relative differences in each period refer to the estimated relative difference between SG and RYGB patients versus baseline, accounting for all other periods.

d. p-value <0.05

e. p-value <0.01

f. p-value <0.001

| <b>eTable 3. E-values and Interpretations for All Models with Statistically Significant Findings Comparing Patients Undergoing SG vs RYGB Between 2008 and 2016</b> |                           |                                                                                |                                                           |
|---------------------------------------------------------------------------------------------------------------------------------------------------------------------|---------------------------|--------------------------------------------------------------------------------|-----------------------------------------------------------|
| <b>Model</b>                                                                                                                                                        | <b>Cohort</b>             | <b>E-value (E-value for relevant limit of confidence interval)<sup>a</sup></b> | <b>Parameter Estimate from Model<sup>b</sup> (95% CI)</b> |
| Year 1 Laboratory Costs                                                                                                                                             | Main cohort               | 1.54 (1.06)                                                                    | 0.88<br>(0.79 , 0.99)                                     |
| Year 4 Prescription Costs                                                                                                                                           | Main cohort               | 2.22 (1.55)                                                                    | 1.44<br>(1.14 , 1.80)                                     |
| Year 3 Prescription Costs                                                                                                                                           | 4-year sensitivity cohort | 1.87 (1.15)                                                                    | 1.28<br>(1.02, 1.59)                                      |
| Year 4 Prescription Costs                                                                                                                                           | 4-year sensitivity cohort | 2.11 (1.35)                                                                    | 1.38<br>(1.07 , 1.78)                                     |
| Year 2 Encounters for cardiometabolic prescription fills                                                                                                            | Main cohort               | 1.51 (1.11)                                                                    | 1.13<br>(1.01, 1.26)                                      |
| Year 3 Encounters for cardiometabolic prescription fills                                                                                                            | Main cohort               | 1.61 (1.14)                                                                    | 1.17<br>(1.01 , 1.34)                                     |
| Year 4 Encounters for cardiometabolic prescription fills                                                                                                            | Main cohort               | 1.82 (1.29)                                                                    | 1.26<br>(1.05 , 1.50)                                     |
| Year 1 Other lab encounters                                                                                                                                         | Main cohort               | 1.49 (1.17)                                                                    | 0.89<br>(0.81, 0.97)                                      |
| Year 2 Other lab encounters                                                                                                                                         | Main cohort               | 1.52 (1.11)                                                                    | 0.88<br>(0.79 , 0.99)                                     |
| Year 3 Specialist encounters                                                                                                                                        | Main cohort               | 1.50 (1.09)                                                                    | 0.89<br>(0.79 , 0.99)                                     |
| Year 4 PCP encounters                                                                                                                                               | 4-year sensitivity cohort | 1.58 (1.12)                                                                    | 1.15<br>(1.01 , 1.31)                                     |

**eTable 3: E-values and Interpretations for All Models with Statistically-Significant Findings Comparing Patients Undergoing SG vs. RYGB Between 2008-2016**

a. E-values were calculated using the E-Value package in R.<sup>1-3</sup> They can be interpreted as follows, using year 4 prescription costs as an example: For unmeasured confounding to invalidate the observed IRR of 1.4, a confounder would have to have a magnitude of effect greater than an IRR of 2.2. One of the most likely confounders, which we do match on and adjust for is ACG score (overall comorbidity measure). In our models, the largest IRR for that term was 2.16, which is slightly less than but similar to 2.2. It is unlikely there is another unmeasured confounder with a larger effect on prescription costs than overall comorbidity burden that would invalidate our results.

b. Since the e-value program requires the inputs to be RR or OR, we used incident rate ratio (IRR). IRRs are the exponentials of the corresponding regression coefficients in the Stata regression outputs.

**eFigure. Flow Diagram for Cohort Selection of Patients with Index SG and RYGB Between 2008 and 2016**

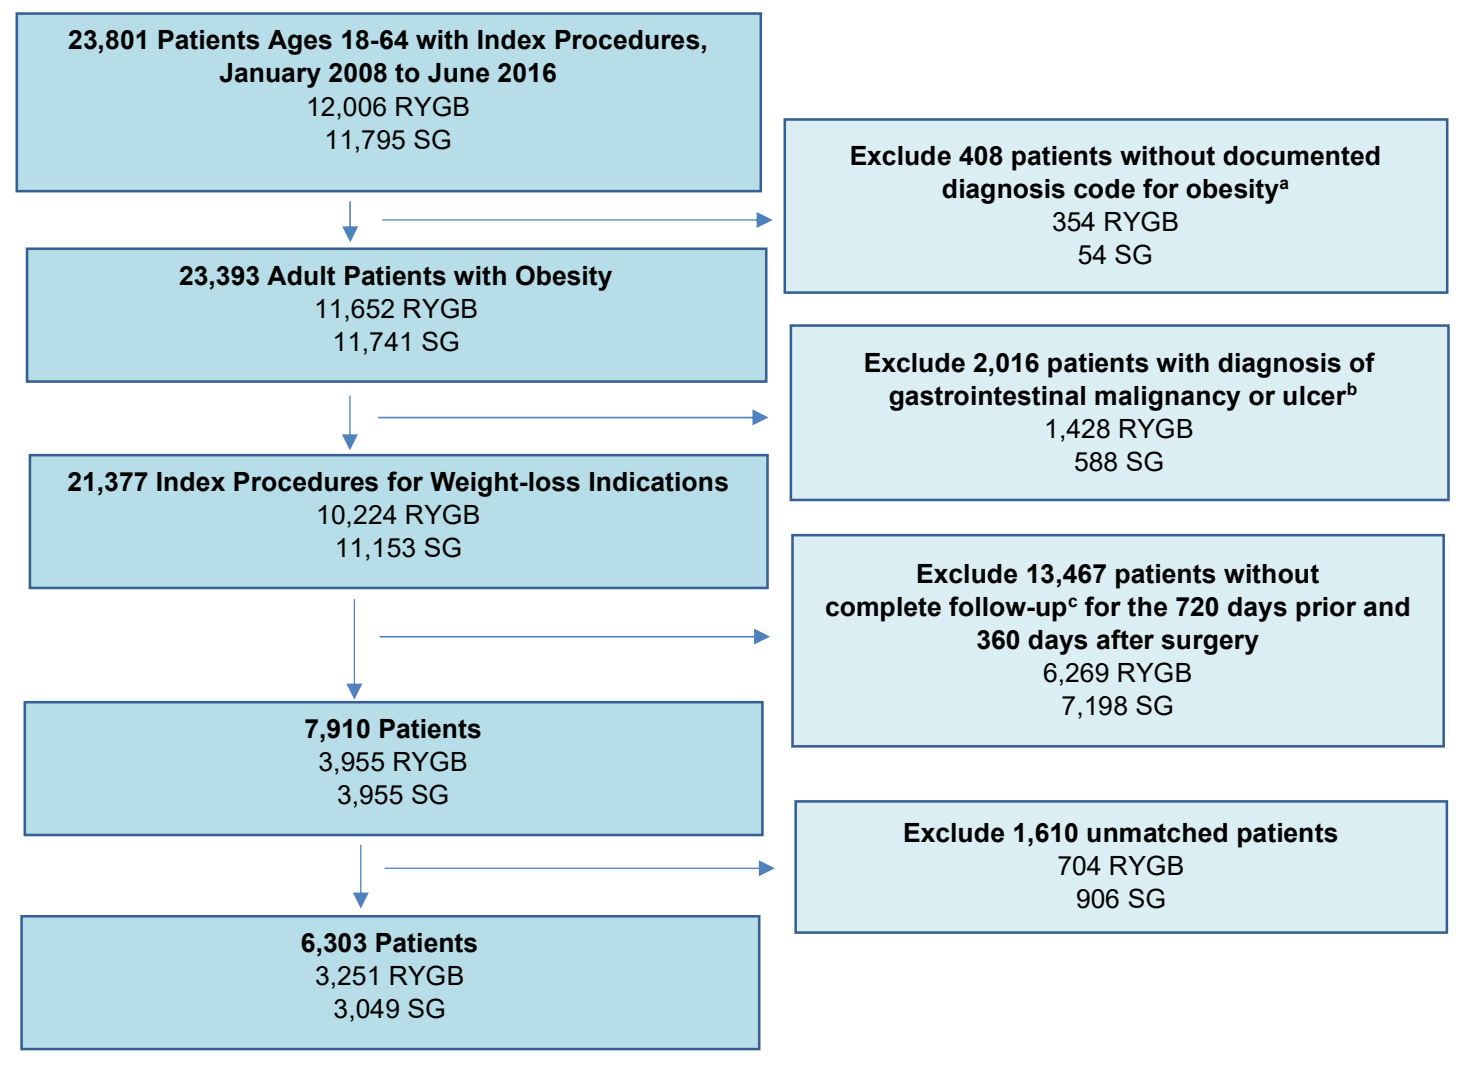

**Abbreviations:** RYGB, Roux-en-Y gastric bypass, SG, Sleeve gastrectomy

**Legend Text:** a. Based on the presence of either a specific BMI diagnosis > 30kg/m<sup>2</sup> or a nonspecific morbid obesity diagnosis in the 360 days before surgery.

b. Patients were excluded if they had a gastrointestinal malignancy diagnosis in the 720 days prior or a gastrointestinal ulcer diagnosis or procedure in the 30 days prior to their index surgery. c. Patients were censored when they turned 65, in the last month of our dataset (June 1, 2017), on the date of incident gastrointestinal malignancy or at insurance disenrollment (loss to follow-up).

| eTable 4. Attrition at Each Postoperative Year for Patients Undergoing SG or RYGB Between 2008 and 2016                         |                      |                      |                      |                      |
|---------------------------------------------------------------------------------------------------------------------------------|----------------------|----------------------|----------------------|----------------------|
|                                                                                                                                 | Time Since Surgery   |                      |                      |                      |
|                                                                                                                                 | 1 year               | 2 years              | 3 years              | 4 years              |
| Number of patients observed by group, regardless of calendar year of surgery (numerators for all percent observed calculations) | SG 3049<br>RYGB 3251 | SG 1952<br>RYGB 2173 | SG 1054<br>RYGB 1151 | SG 514<br>RYGB 643   |
| Percent of full analytic cohort observed, relative to surgery date (using 3049 SG & 3251 RYGB as denominator)                   | SG 100%<br>RYGB 100% | SG 64%<br>RYGB 67%   | SG 35%<br>RYGB 35%   | SG 17%<br>RYGB 20%   |
| Number of patients eligible for this amount of follow-up based on year of surgery                                               | SG 3049<br>RYGB 3251 | SG 2561<br>RYGB 2997 | SG 1972<br>RYGB 2237 | SG 1396<br>RYGB 1700 |
| Percent of eligible patients observed (true cohort retention rate, using # eligible as denominator)                             | SG 100%<br>RYGB 100% | SG 76%<br>RYGB 73%   | SG 53%<br>RYGB 51%   | SG 37%<br>RYGB 38%   |

**eTable 5. Examining for Differential Attrition by Patient Characteristics: Baseline Characteristics of Patients in Main Analytic Cohort Enrolled at 1 and 4 Years After Surgery**

| Variable <sup>c</sup>                        | Enrolled at 360d After Matching <sup>a</sup> ,<br>No. (%) |                        |                                                | Enrolled at 1440d After Matching <sup>a</sup> ,<br>No. (%) |                       |                                                |
|----------------------------------------------|-----------------------------------------------------------|------------------------|------------------------------------------------|------------------------------------------------------------|-----------------------|------------------------------------------------|
|                                              | <b>RYGB<br/>(N=4488)</b>                                  | <b>SG<br/>(N=4142)</b> | <b>Standardized<br/>Difference<sup>b</sup></b> | <b>RYGB<br/>(N=687)</b>                                    | <b>SG<br/>(N=392)</b> | <b>Standardized<br/>Difference<sup>b</sup></b> |
| Year of Surgery                              |                                                           |                        | 0.00                                           |                                                            |                       | 0.00                                           |
| 2008-2011                                    | 962<br>(21.4%)                                            | 888<br>(21.4%)         |                                                | 386<br>(56.1%)                                             | 220<br>(56.1%)        |                                                |
| 2012-2014                                    | 2424<br>(54.0%)                                           | 2237<br>(54.0%)        |                                                | 301<br>(43.9%)                                             | 172<br>(43.9%)        |                                                |
| 2015-2017                                    | 1102<br>(24.6%)                                           | 1017<br>(24.6%)        |                                                |                                                            |                       |                                                |
| Age ≥ 40 y                                   | 2985<br>(66.5%)                                           | 2821<br>(68.1%)        | 0.07                                           | 500<br>(72.8%)                                             | 293<br>(74.7%)        | 0.03                                           |
| Female Sex                                   | 3449<br>(76.9%)                                           | 3163<br>(76.4%)        | -0.01                                          | 535<br>(77.9%)                                             | 285<br>(72.7%)        | -0.12                                          |
| White<br>Neighborhood <sup>d</sup> ,<br>≥75% | 2436<br>(54.3%)                                           | 2165<br>(52.3%)        | 0.10                                           | 386<br>(56.1%)                                             | 217<br>(55.4%)        | 0.25                                           |
| Neighborhood<br>Poverty <sup>e</sup>         |                                                           |                        | 0.03                                           |                                                            |                       | 0.12                                           |
| Less Poor<br>(<10%)                          | 2084<br>(46.5%)                                           | 1991<br>(48.1%)        |                                                | 357<br>(52.0%)                                             | 205<br>(52.2%)        |                                                |
| More Poor<br>(≥10%)                          | 2403<br>(53.5%)                                           | 2151<br>(51.9%)        |                                                | 330<br>(48.0%)                                             | 187<br>(47.7%)        |                                                |
| Region of United<br>States                   |                                                           |                        | 0.00                                           |                                                            |                       | 0.00                                           |
| West                                         | 747<br>(16.6%)                                            | 689<br>(16.6%)         |                                                | 123<br>(17.9%)                                             | 70<br>(17.9%)         |                                                |
| South                                        | 2537<br>(56.5%)                                           | 2341<br>(56.5%)        |                                                | 389<br>(56.6%)                                             | 222<br>(56.6%)        |                                                |
| Midwest                                      | 862<br>(19.2%)                                            | 796<br>(19.2%)         |                                                | 138<br>(20.2%)                                             | 79<br>(20.2%)         |                                                |
| Northeast                                    | 342<br>(7.6%)                                             | 316<br>(7.6%)          |                                                | 37 (5.4%)                                                  | 21<br>(5.4%)          |                                                |
| BMI Category <sup>f</sup>                    |                                                           |                        | 0.00                                           |                                                            |                       | 0.00                                           |
| 30-39.9                                      | 612<br>(13.6%)                                            | 565<br>(13.6%)         |                                                | 77<br>(11.2%)                                              | 44<br>(11.2%)         |                                                |
| 40-49.9                                      | 2579<br>(57.5%)                                           | 2380<br>(57.5%)        |                                                | 485<br>(70.7%)                                             | 277<br>(70.7%)        |                                                |
| 50-59.9                                      | 614<br>(13.7%)                                            | 567<br>(13.7%)         |                                                | 56 (8.2%)                                                  | 32<br>(8.2%)          |                                                |
| ≥60                                          | 87 (1.9%)                                                 | 80 (1.9%)              |                                                | 5 (0.8%)                                                   | 3 (0.8%)              |                                                |
| Non-specific<br>obesity                      | 596<br>(13.3%)                                            | 550<br>(13.3%)         |                                                | 63 (9.2%)                                                  | 36<br>(9.2%)          |                                                |
| ACG Score ≥3                                 | 1583<br>(35.3%)                                           | 1410<br>(34.0%)        | -0.03                                          | 201<br>(29.3%)                                             | 115<br>(29.3%)        | 0.01                                           |
| Type 2 Diabetes                              | 1371<br>(30.5%)                                           | 1265<br>(30.5%)        | 0.00                                           | 182<br>(26.5%)                                             | 104<br>(26.5%)        | 0.00                                           |
| Insulin Use                                  | 230<br>(5.1%)                                             | 212<br>(5.1%)          | 0.00                                           | 26 (3.8%)                                                  | 15<br>(3.8%)          | 0.00                                           |

|                        |                 |                 |       |                |                |       |
|------------------------|-----------------|-----------------|-------|----------------|----------------|-------|
| Hypertension           | 2533<br>(56.4%) | 2405<br>(58.1%) | 0.03  | 373<br>(54.3%) | 228<br>(58.2%) | 0.08  |
| Cardiovascular Disease | 445<br>(9.9%)   | 436<br>(10.5%)  | 0.02  | 64 (9.3%)      | 51<br>(13.0%)  | 0.12  |
| Psychiatric Illness    | 1168<br>(26.0%) | 1030<br>(24.9%) | -0.03 | 157<br>(22.9%) | 85<br>(21.7%)  | -0.03 |

eTable 5: Examining for Differential Attrition by Patient Characteristics: Baseline Characteristics of Patients in our Main Analytic Cohort Enrolled at 1 and 4 years after Surgery

Abbreviations: RYGB, Roux-en-Y gastric bypass, SG, Sleeve gastrectomy, BMI, Body Mass Index, ACG, Johns Hopkins Adjusted Clinical Groups ® System , ED, Emergency Department

a. We conducted coarsened exact matching (CEM) on BMI category, diabetes status and insulin use, total ambulatory care cost quartile during the pre-surgical year, region of the U.S., and calendar period, as well as tertile of a propensity score that included patient sex, age group, ACG score (<3 vs. ≥3), and neighborhood demographics b. Standardized differences are the difference in means between intervention and control divided by the SD of the difference in means. Lower absolute values indicate greater similarity, and values <0.2 indicate minimal differences between groups. c. Please refer to the methods section for complete descriptions of how we constructed baseline variables. d. White neighborhoods defined as census tracts where >75% of residents were Non-Hispanic White. e. Neighborhoods with more poverty were those where ≥10% of households were below the poverty line. f. Body mass index based on most recent pre-surgery diagnosis



eTable 6. Presurgery Characteristics of the Matched Main Cohort vs the Sensitivity Cohort of Patients With Index SG and RYGB Between 2008 and 2016

| Variable <sup>c</sup>                  | RYGB, No. (%)             |                                 |                                      | SG, No. (%)             |                               |                                      |
|----------------------------------------|---------------------------|---------------------------------|--------------------------------------|-------------------------|-------------------------------|--------------------------------------|
|                                        | RYGB Main Cohort (N=3251) | RYGB Sensitivity Cohort (N=687) | Standardized Difference <sup>b</sup> | SG Main Cohort (N=3049) | SG Sensitivity Cohort (N=392) | Standardized Difference <sup>b</sup> |
| Year of Surgery                        |                           |                                 | 0.53                                 |                         |                               | 0.83                                 |
| 2008-2011                              | 2191 (67.4%)              | 568 (82.7%)                     |                                      | 695 (22.8%)             | 220 (56.1%)                   |                                      |
| 2012-2014                              | 881 (27.1%)               | 119 (17.3%)                     |                                      | 1648 (54.1%)            | 172 (43.9%)                   |                                      |
| 2015-2017                              | 179 (5.5%)                | 0 (0%)                          |                                      | 706 (23.1%)             | 0 (0.0%)                      |                                      |
| Age ≥ 40 y                             | 2272 (69.9%)              | 470 (68.4%)                     | 0.17                                 | 2140 (70.2%)            | 293 (74.7%)                   | 0.14                                 |
| Female Sex                             | 2530 (77.8%)              | 534 (77.7%)                     | -0.02                                | 2302 (75.5%)            | 285 (72.7%)                   | -0.07                                |
| White Neighborhood <sup>d</sup> , ≥75% | 1755 (54.0%)              | 375 (54.6%)                     | 0.05                                 | 1601 (52.5%)            | 217 (55.4%)                   | 0.15                                 |
| Neighborhood Poverty <sup>e</sup>      |                           |                                 | 0.12                                 |                         |                               | 0.12                                 |
| Less Poor (<10%)                       | 1491 (45.8%)              | 321 (46.7%)                     |                                      | 1507 (49.4%)            | 205 (52.3%)                   |                                      |
| More Poor (≥10%)                       | 1760 (54.2%)              | 366 (53.3%)                     |                                      | 1542 (50.6%)            | 187 (47.7%)                   |                                      |
| Region of United States                |                           |                                 | 0.06                                 |                         |                               | 0.20                                 |
| West                                   | 588 (18.1%)               | 122 (17.8%)                     |                                      | 489 (16.0%)             | 70 (17.9%)                    |                                      |
| South                                  | 1749 (53.8%)              | 390 (56.8%)                     |                                      | 1722 (56.5%)            | 222 (56.6%)                   |                                      |
| Midwest                                | 685 (21.1%)               | 138 (20.1%)                     |                                      | 575 (18.9%)             | 79 (20.2%)                    |                                      |
| Northeast                              | 229 (7.0%)                | 37 (5.4%)                       |                                      | 263 (8.6%)              | 21 (5.4%)                     |                                      |
| BMI Category <sup>f</sup>              |                           |                                 | 0.66                                 |                         |                               | 0.32                                 |
| 30-39.9                                | 264 (8.1%)                | 46 (6.7%)                       |                                      | 397 (13.0%)             | 44 (11.2%)                    |                                      |
| 40-49.9                                | 1807 (55.6%)              | 520 (75.7%)                     |                                      | 1824 (59.8%)            | 277 (70.7%)                   |                                      |
| 50-59.9                                | 274 (8.4%)                | 40 (5.8%)                       |                                      | 411 (13.5%)             | 32 (8.2%)                     |                                      |
| ≥60                                    | 31 (1.0%)                 | 2 (0.3%)                        |                                      | 35 (1.1%)               | 3 (0.8%)                      |                                      |
| Non-specific obesity                   | 875 (26.9%)               | 79 (11.5%)                      |                                      | 382 (12.5%)             | 36 (9.2%)                     |                                      |
| ACG Score ≥3                           | 1152 (35.4%)              | 208 (30.3%)                     | 0.00                                 | 1063 (34.9%)            | 115 (29.3%)                   | -0.12                                |
| Type 2 Diabetes                        | 1267 (39.0%)              | 197 (28.7%)                     | 0.00                                 | 947 (31.1%)             | 104 (26.5%)                   | -0.14                                |
| Insulin Use                            | 274 (8.4%)                | 23 (3.3%)                       | 0.00                                 | 159 (5.2%)              | 15 (3.8%)                     | -0.08                                |

|                        |                 |                |       |                 |                |       |
|------------------------|-----------------|----------------|-------|-----------------|----------------|-------|
| Hypertension           | 1987<br>(61.1%) | 374<br>(54.4%) | 0.00. | 1795<br>(58.9%) | 228<br>(58.2%) | -0.02 |
| Cardiovascular Disease | 408<br>(12.5%)  | 76 (11.1%)     | 0.17  | 346<br>(11.3%)  | 51 (13.0%)     | 0.05  |
| Psychiatric Illness    | 843<br>(25.9%)  | 136<br>(19.8%) | 0.00  | 738<br>(24.2%)  | 85 (21.7%)     | 0.18  |

eTable 6: Pre-Surgery Characteristics of the Matched Main Cohort vs. the Sensitivity Cohort of Patients with Index SG and RYGB between 2008 and 2016

Abbreviations: RYGB, Roux-en-Y gastric bypass, SG, Sleeve gastrectomy, BMI, Body Mass Index, ACG, Johns Hopkins Adjusted Clinical Groups ® System , ED, Emergency Department

a. We conducted coarsened exact matching (CEM) on BMI category, diabetes status and insulin use, total ambulatory care cost quartile during the pre-surgical year, region of the U.S., and calendar period, as well as tertile of a propensity score that included patient sex, age group, ACG score (<3 vs. ≥3), and neighborhood demographics. The comparison between the matched main cohort and sensitivity cohort did not use the matched weights because the coarsened exact matches were conducted separately.

b. Standardized differences are the difference in means between intervention and control divided by the SD of the difference in means. Lower absolute values indicate greater similarity, and values <0.2 indicate minimal differences between groups. c.

Please refer to the methods section for complete descriptions of how we constructed baseline variables. d. White neighborhoods defined as census tracts where >75% of residents were Non-Hispanic White. e. Neighborhoods with more poverty were those where ≥10% of households were below the poverty line. f. Body mass index based on most recent pre-surgery diagnosis

**eTable 7. Results From Multivariable Difference-in-Differences Analyses Comparing Patients Undergoing SG vs RYGB Between 2008 and 2016 Across Categories of Ambulatory Care Costs and Use Among Those With 4 Years of Follow-up**

|                             | Post-Operative Year 1,<br>SG vs. RYGB        |                                                  | Post-Operative Year 2,<br>SG vs. RYGB |                                     | Post-Operative Year 3,<br>SG vs. RYGB |                                     | Post-Operative Year 4,<br>SG vs. RYGB |                                     |
|-----------------------------|----------------------------------------------|--------------------------------------------------|---------------------------------------|-------------------------------------|---------------------------------------|-------------------------------------|---------------------------------------|-------------------------------------|
|                             | Absolute Difference <sup>e</sup><br>(95% CI) | Relative Difference <sup>c</sup> (%)<br>(95% CI) | Absolute Difference<br>(95% CI)       | Relative Difference (%)<br>(95% CI) | Absolute Difference<br>(95% CI)       | Relative Difference (%)<br>(95% CI) | Absolute Difference<br>(95% CI)       | Relative Difference (%)<br>(95% CI) |
| Total Ambulatory Care Costs | 1045.1<br>(-381.0, 2471.2)                   | 14.6%<br>(-7.2%, 36.4%)                          | 705.6<br>(-557.3, 1968.4)             | 11.3%<br>(-10.5%, 33.1%)            | 296.8<br>(-972.5, 1566.0)             | 4.7%<br>(-16.3%, 25.7%)             | 1278.4<br>(-253.6, 2810.3)            | 18.6%<br>(-6.4%, 43.7%)             |
| Prescription Drug Costs     | 298.5<br>(-85.2, 682.2)                      | 17.1%<br>(-7.5%, 41.7%)                          | 316.0<br>(-100.4, 732.4)              | 18.6%<br>(-9.0%, 46.2%)             | 482.2 <sup>d</sup><br>(87.8, 876.6)   | 29.6% <sup>d</sup><br>(1.0%, 58.3%) | 700.2 <sup>e</sup><br>(210.9, 1189.4) | 42.5% <sup>d</sup><br>(6.9%, 78.0%) |
| Office Visit Costs          | 46.1<br>(-86.3, 178.5)                       | 5.7%<br>(-11.6%, 23.0%)                          | 28.0<br>(-92.4, 148.3)                | 3.9%<br>(-13.5%, 21.3%)             | -14.7<br>(-130.0, 100.5)              | -2.1%<br>(-18.5%, 14.2%)            | 22.3<br>(-95.7, 140.4)                | 3.0%<br>(-13.4%, 19.5%)             |
| Laboratory Costs            | -68.5<br>(-254.0, 117.1)                     | -7.9%<br>(-28.0%, 12.1%)                         | -39.8<br>(-183.0, 103.5)              | -6.5%<br>(-28.8%, 15.8%)            | -16.4<br>(-141.0, 108.2)              | -3.3%<br>(-27.9%, 21.3%)            | 47.0<br>(-82.3, 176.3)                | 10.0%<br>(-19.2%, 39.2%)            |
| Radiology Costs             | 180.7<br>(-12.1, 373.4)                      | 33.3%<br>(-9.8%, 76.5%)                          | 92.7<br>(-130.1, 315.4)               | 15.7%<br>(-26.3%, 57.7%)            | -9.1<br>(-176.3, 158.1)               | -1.7%<br>(-32.9%, 29.5%)            | 147.1<br>(-38.1, 332.4)               | 27.8%<br>(-13.8%, 69.4%)            |
| All Other Outpatient Costs  | 246.5<br>(-1160.4, 1653.3)                   | 7.0%<br>(-35.0%, 49.0%)                          | 152.9<br>(-989.2, 1295.0)             | 5.3%<br>(-36.2%, 46.8%)             | -333.7<br>(-1556.5, 889.0)            | -10.5%<br>(-45.6%, 24.7%)           | -108.0<br>(-1572.6, 1356.5)           | -2.9%<br>(-40.7%, 35.0%)            |

**eTable 7: Results from Multivariable Difference-in-Differences Analyses<sup>a</sup> Comparing Patients Undergoing SG vs. RYGB from 2008 to 2016 Across Categories of Ambulatory Care Costs & Use among the people with 4 years of follow-up**

- a. Difference-in-Differences analyses adjusting for all matched variables were used to generate between-group estimates for change in each outcome, at each time period, relative to a preoperative baseline period spanning months -24 to -13 before the index surgical date. We selected year -2 as the preoperative baseline for comparison because the year immediately before surgery represents a very high utilization time, due to pre-operative workup.
- b. Absolute differences in each period refer to the estimated actual change in costs among SG patients minus that in RYGB patients in that segment versus baseline (months -24 to -13), accounting for all other periods.
- c. Relative differences in each period refer to the estimated relative difference between SG and RYGB patients versus baseline, accounting for all other periods.
- d. p-value <0.05
- e. p-value <0.01

**eTable 8. Results From Multivariable Difference-in-Differences Analyses Comparing Patients Undergoing SG v. RYGB Between 2008 and 2016 Across Suboutcomes of Ambulatory Care Costs and Use Among Those With 4 Years of Follow-Up**

|                                    | Post-Operative Year 1, SG vs. RYGB        |                                               | Post-Operative Year 2, SG vs. RYGB |                                     | Post-Operative Year 3, SG vs. RYGB |                                     | Post-Operative Year 4, SG vs. RYGB |                                      |
|------------------------------------|-------------------------------------------|-----------------------------------------------|------------------------------------|-------------------------------------|------------------------------------|-------------------------------------|------------------------------------|--------------------------------------|
|                                    | Absolute Difference <sup>b</sup> (95% CI) | Relative Difference <sup>c</sup> (%) (95% CI) | Absolute Difference (95% CI)       | Relative Difference (%) (95% CI)    | Absolute Difference (95% CI)       | Relative Difference (%) (95% CI)    | Absolute Difference (95% CI)       | Relative Difference (%) (95% CI)     |
| <b>PRESCRIPTION ENCOUNTERS</b>     |                                           |                                               |                                    |                                     |                                    |                                     |                                    |                                      |
| Cardiometabolic prescription fills | 0.7 <sup>f</sup> (0.3, 1.1)               | 16.6% <sup>e</sup> (6.3%, 26.9%)              | 1.1 <sup>f</sup> (0.7, 1.5)        | 31.0% <sup>f</sup> (16.6%, 45.5%)   | 1.5 <sup>f</sup> (0.9, 2.1)        | 42.2% <sup>f</sup> (21.5%, 62.8%)   | 1.7 <sup>f</sup> (0.8, 2.6)        | 42.5% <sup>e</sup> (13.7%, 71.2%)    |
| All other prescription fills       | -0.5 (-1.4, 0.5)                          | -3.0% (-9.0%, 2.9%)                           | -0.1 (-1.2, 0.9)                   | -1.0% (-8.3%, 6.3%)                 | 0.4 (-1.0, 1.9)                    | 2.8% (-7.2%, 12.7%)                 | 1.4 (-0.5, 3.3)                    | 10.1% (-4.5%, 24.8%)                 |
| <b>OFFICE VISIT ENCOUNTERS</b>     |                                           |                                               |                                    |                                     |                                    |                                     |                                    |                                      |
| Specialist visits                  | 0.0 (-0.6, 0.5)                           | -1.1% (-17.4%, 15.2%)                         | -0.1 (-0.6, 0.3)                   | -4.9% (-22.9%, 13.0%)               | -0.2 (-0.6, 0.2)                   | -10.1% (-27.3%, 7.2%)               | 0.1 (-0.2, 0.5)                    | 5.9% (-11.6%, 23.5%)                 |
| PCP visits                         | 0.2 (-0.1, 0.4)                           | 8.8% (-4.3%, 21.9%)                           | 0.1 (-0.1, 0.4)                    | 8.9% (-5.0%, 22.7%)                 | 0.2 (-0.1, 0.4)                    | 11.2% (-4.7%, 27.2%)                | 0.2 (0.0, 0.4)                     | 15.5% <sup>d</sup> (0.2%, 30.8%)     |
| <b>LABORATORY ENCOUNTERS</b>       |                                           |                                               |                                    |                                     |                                    |                                     |                                    |                                      |
| Nutrition labs                     | -1.2 <sup>d</sup> (-2.2, -0.2)            | -20.0% <sup>e</sup> (-34.0%, -6.0%)           | -0.8 <sup>d</sup> (-1.5, -0.2)     | -24.3% <sup>e</sup> (-39.2%, -9.5%) | -0.5 (-1.0, 0.0)                   | -20.3% <sup>d</sup> (-38.3%, -2.3%) | -0.7 <sup>d</sup> (-1.2, -0.1)     | -30.4% <sup>e</sup> (-48.8%, -11.9%) |
| All other labs                     | -2.5 <sup>e</sup> (-4.1, -1.0)            | -14.5% <sup>f</sup> (-22.4%, -6.7%)           | -2.5 <sup>e</sup> (-4.1, -0.8)     | -17.4% <sup>f</sup> (-27.0%, -7.7%) | -0.7 (-2.3, 0.9)                   | -5.7% (-18.7%, 7.4%)                | -0.3 (-3.2, 2.6)                   | -2.3% (-26.3%, 21.6%)                |
| <b>RADIOLOGY ENCOUNTERS</b>        |                                           |                                               |                                    |                                     |                                    |                                     |                                    |                                      |
| Abdomen/pelvic imaging             | -0.2 (-0.4, 0.1)                          | -18.7% (-38.8%, 1.5%)                         | -0.2 (-0.5, 0.0)                   | -22.7% <sup>d</sup> (-44.6%, -0.8%) | -0.1 (-0.3, 0.1)                   | -14.4% (-44.3%, 15.5%)              | -0.1 (-0.4, 0.1)                   | -19.7% (-51.6%, 12.1%)               |
| All other imaging                  | 0.1 (-0.3, 0.4)                           | 2.7% (-10.2%, 15.6%)                          | 0.2 (-0.2, 0.6)                    | 6.2% (-8.5%, 20.9%)                 | 0.4 (-0.1, 1.0)                    | 14.1% (-6.3%, 34.6%)                | 0.3 (-0.3, 0.9)                    | 9.0% (-11.5%, 29.5%)                 |

**eTable 8: Results from Multivariable Difference-in-Differences Analyses Comparing Patients Undergoing SG vs. RYGB Between 2008-2016 Across Sub-Outcomes of Ambulatory Care Costs & Use Among the People With 4 Years of Follow-Up**

a. Difference-in-Differences analyses adjusting for all matched variables were used to generate between-group estimates for change in each outcome, at each time period, relative to a preoperative baseline period spanning months -24 to -13 before the index surgical date. We selected year -2 as the preoperative baseline for comparison because the year immediately before surgery represents a very high utilization time, due to pre-operative workup.  
 b. Absolute differences in each period refer to the estimated actual change in costs among SG patients minus that in RYGB patients in that segment versus baseline (months -24 to -13), accounting for all other periods.  
 c. Relative differences in each period refer to the estimated relative difference between SG and RYGB patients versus baseline, accounting for all other periods.  
 d. p-value <0.05  
 e. p-value <0.01  
 f. p-value <0.001

eTable 9. Stata Outputs for All Models<sup>a</sup>

| Outcome                     | Main Cohort                                                                                                                                                                                                                                                                                                                                                                                                                                                                                                                                                                                                                                                                                                                                                                                                                                                                                                                                                                                                                                                                                                                                                                                                                                                                                                                                                   | Sensitivity Cohort                                                                                                                                                                                                                                                                                                                                                                                                                                                                                                                                                                                                                                                                                                                                                                                                                                                                                                                                                                                                                                                                                             |
|-----------------------------|---------------------------------------------------------------------------------------------------------------------------------------------------------------------------------------------------------------------------------------------------------------------------------------------------------------------------------------------------------------------------------------------------------------------------------------------------------------------------------------------------------------------------------------------------------------------------------------------------------------------------------------------------------------------------------------------------------------------------------------------------------------------------------------------------------------------------------------------------------------------------------------------------------------------------------------------------------------------------------------------------------------------------------------------------------------------------------------------------------------------------------------------------------------------------------------------------------------------------------------------------------------------------------------------------------------------------------------------------------------|----------------------------------------------------------------------------------------------------------------------------------------------------------------------------------------------------------------------------------------------------------------------------------------------------------------------------------------------------------------------------------------------------------------------------------------------------------------------------------------------------------------------------------------------------------------------------------------------------------------------------------------------------------------------------------------------------------------------------------------------------------------------------------------------------------------------------------------------------------------------------------------------------------------------------------------------------------------------------------------------------------------------------------------------------------------------------------------------------------------|
| Total Ambulatory Care Costs | -----<br> <br>tot_ambcst   Robust<br>Coef. Std. Err. z P> z  [95% Conf. Interval]<br>-----+-----<br>tot_ambcst  <br>yr  <br>1   .1300821 .0522103 2.49 0.013 .0277517 .2324124<br>2   .1046842 .0587896 1.78 0.075 -<br>.0105413 .2199097<br>3   .0366438 .0725058 0.51 0.613 -<br>.1054649 .1787526<br>4   .1130782 .1034547 1.09 0.274 -<br>.0896893 .3158456<br> <br>1.sg   .0351299 .0468238 0.75 0.453 -<br>.0566431 .1269029<br> <br>sg#yr  <br>1 1   -.0630903 .058405 -1.08 0.280 -.177562 .0513815<br>1 2   -.0923825 .0675037 -1.37 0.171 -<br>.2246873 .0399224<br>1 3   -.0308911 .0822194 -0.38 0.707 -<br>.1920381 .1302559<br>1 4   .0271538 .1172427 0.23 0.817 -<br>.2026377 .2569452<br> <br>age_group  <br>2   .0868346 .0854009 1.02 0.309 -<br>.0805482 .2542173<br>3   .156703 .0839819 1.87 0.062 -.0078985 .3213045<br>4   .315266 .0858431 3.67 0.000 .1470166 .4835153<br> <br>race  <br>2   -.3271405 .0864463 -3.78 0.000 -.4965721 -<br>.1577089<br>3   -.0635124 .0397032 -1.60 0.110 -<br>.1413293 .0143044<br>4   -.0368569 .0681548 -0.54 0.589 -.1704378 .096724<br>5   -.0889176 .1109678 -0.80 0.423 -<br>.3064105 .1285754<br> <br>ed  <br>2   .0009908 .0471978 0.02 0.983 -<br>.0915151 .0934968<br>3   -.0412176 .0787256 -0.52 0.601 -.195517 .1130817<br>4   -.2372242 .1080496 -2.20 0.028 -.4489975 -<br>.0254508 | -----<br> <br>tot_ambcst   Robust<br>Coef. Std. Err. z P> z  [95% Conf. Interval]<br>-----+-----<br>tot_ambcst  <br>yr  <br>1   -.0677238 .0655575 -1.03 0.302 -<br>.1962142 .0607666<br>2   -.194411 .0725319 -2.68 0.007 -<br>.3365709 -.0522511<br>3   -.1760789 .0746916 -2.36 0.018 -<br>.3224717 -.0296861<br>4   -.0872408 .079984 -1.09 0.275 -<br>.2440066 .069525<br> <br>1.sg   .0552233 .0816563 0.68 0.499 -<br>.1048201 .2152666<br> <br>sg#yr  <br>1 1   .1358632 .0969947 1.40 0.161 -<br>.0542429 .3259692<br>1 2   .1044227 .1005147 1.04 0.299 -<br>.0925825 .3014279<br>1 3   .0333842 .1028376 0.32 0.745 -<br>.1681737 .2349421<br>1 4   .167206 .1078096 1.55 0.121 -<br>.044097 .378509<br> <br>age_group  <br>2   .3106588 .1498167 2.07 0.038<br>.0170235 .6042941<br>3   .4183738 .1377426 3.04 0.002<br>.1484032 .6883444<br>4   .6154705 .1426143 4.32 0.000<br>.3359515 .8949894<br> <br>race  <br>2   .3230256 .2585262 1.25 0.211 -<br>.1836764 .8297276<br>3   .0058771 .0783017 0.08 0.940 -<br>.1475913 .1593456<br>4   .0553605 .1218815 0.45 0.650 -<br>.1835229 .2942439 |

|  |          |                |           |          |       |       |           |          |         |                |           |          |       |       |   |  |
|--|----------|----------------|-----------|----------|-------|-------|-----------|----------|---------|----------------|-----------|----------|-------|-------|---|--|
|  |          |                |           |          |       |       |           |          |         | 5              | -.2810962 | .4522778 | -0.62 | 0.534 | - |  |
|  |          | pov            |           |          |       |       |           |          |         | 2              | .605352   |          |       |       |   |  |
|  |          | 2              | .0152685  | .0553875 | 0.28  | 0.783 | -.093289  | .123826  |         |                |           |          |       |       |   |  |
|  |          | 3              | .013897   | .0533524 | 0.26  | 0.794 | -.0906717 | .1184658 |         | ed             |           |          |       |       |   |  |
|  |          | 4              | .0780193  | .0674812 | 1.16  | 0.248 | -.0542414 | .21028   |         | 2              | -.0780973 | .0922551 | -0.85 | 0.397 | - |  |
|  |          |                |           |          |       |       |           |          |         |                |           |          |       |       |   |  |
|  |          | 1.acgge3       |           |          |       |       |           |          |         | 3              | -.4125243 | .1227459 | -3.36 | 0.001 | - |  |
|  |          |                | .6108935  | .0371825 | 16.43 | 0.000 | .5380171  | .6837699 |         | 4              | -.3874549 | .1925998 | -2.01 | 0.044 | - |  |
|  |          | 1.female       | .1497811  | .0450562 | 3.32  | 0.001 | .0614726  | .2380896 |         |                |           |          |       |       |   |  |
|  |          | 1.hypertension | .2273961  | .0391821 | 5.80  | 0.000 | .1506006  | .3041916 |         |                |           |          |       |       |   |  |
|  |          | _cons          | 8.137427  | .1005821 | 80.90 | 0.000 | 7.94029   | 8.334564 |         |                |           |          |       |       |   |  |
|  |          | -----+         |           |          |       |       |           |          |         |                |           |          |       |       |   |  |
|  |          | inflate        |           |          |       |       |           |          |         | pov            |           |          |       |       |   |  |
|  |          |                |           |          |       |       |           |          |         | 2              | .0188421  | .09851   | 0.19  | 0.848 | - |  |
|  |          | yr             |           |          |       |       |           |          |         |                |           |          |       |       |   |  |
|  |          | 1              | -1.887072 | .9063757 | -2.08 | 0.037 | -3.663536 | -        |         | 3              | .2213879  | .1087444 | 2.04  | 0.042 |   |  |
|  | .1106087 |                |           |          |       |       |           |          |         | 4              | .2556868  | .1273706 | 2.01  | 0.045 |   |  |
|  |          | 2              | .6073201  | .3205366 | 1.89  | 0.058 | -.0209202 | 1.23556  |         |                |           |          |       |       |   |  |
|  |          | 3              | 1.199078  | .3175239 | 3.78  | 0.000 | .5767421  | 1.821413 |         |                |           |          |       |       |   |  |
|  |          | 4              | 1.551541  | .3264369 | 4.75  | 0.000 | .9117366  | 2.191346 |         |                |           |          |       |       |   |  |
|  |          | 1.sg           | .603472   | .2281868 | 2.64  | 0.008 | .1562342  | 1.05071  |         | 1.acgge3       | .6487832  | .0793372 | 8.18  | 0.000 |   |  |
|  |          |                |           |          |       |       |           |          |         |                |           |          |       |       |   |  |
|  |          | sg#yr          |           |          |       |       |           |          |         | .4932852       | .8042813  |          |       |       |   |  |
|  |          | 1 1            | -.2027465 | .9708919 | -0.21 | 0.835 | -         |          |         | 1.female       | .291947   | .0770203 | 3.79  | 0.000 |   |  |
|  | 2.10566  | 1.700167       |           |          |       |       |           |          |         | .1409899       | .4429041  |          |       |       |   |  |
|  |          | 1 2            | -.3879155 | .3539717 | -1.10 | 0.273 | -         |          |         | 1.hypertension | .2166843  | .074549  | 2.91  | 0.004 |   |  |
|  | 1.081687 | .3058563       |           |          |       |       |           |          |         | .070571        | .3627977  |          |       |       |   |  |
|  |          | 1 3            | -.6284691 | .354131  | -1.77 | 0.076 | -         |          |         | _cons          | 7.744628  | .1658379 | 46.70 | 0.000 |   |  |
|  | 1.322553 | .0656149       |           |          |       |       |           |          |         | 7.419592       | .8069665  |          |       |       |   |  |
|  |          | 1 4            | -.8756574 | .3779266 | -2.32 | 0.021 | -1.61638  | -        |         | -----+         |           |          |       |       |   |  |
|  | .1349348 |                |           |          |       |       |           |          | inflate |                |           |          |       |       |   |  |
|  |          |                |           |          |       |       |           |          |         | yr             |           |          |       |       |   |  |
|  |          | age_group      |           |          |       |       |           |          |         | 1              | -2.614939 | .8624431 | -3.03 | 0.002 | - |  |
|  |          | 2              | -.2970284 | .2389247 | -1.24 | 0.214 | -         |          |         |                |           |          |       |       |   |  |
|  | .7653122 | .1712553       |           |          |       |       |           |          |         | 2              | -.6323648 | .4651289 | -1.36 | 0.174 | - |  |
|  |          | 3              | -.6345757 | .2444575 | -2.60 | 0.009 | -1.113704 | -        |         |                |           |          |       |       |   |  |
|  | .1554477 |                |           |          |       |       |           |          |         | 3              | .2695607  | .4075011 | 0.66  | 0.508 | - |  |
|  |          | 4              | -.694009  | .3759116 | -1.85 | 0.065 | -1.430782 | .0427642 |         |                |           |          |       |       |   |  |
|  |          | race           |           |          |       |       |           |          |         | 4              | .0691787  | .4136985 | 0.17  | 0.867 | - |  |
|  |          | 2              | .3325408  | .3742335 | 0.89  | 0.374 | -         |          |         |                |           |          |       |       |   |  |
|  | .4009434 | 1.066025       |           |          |       |       |           |          |         | 1.sg           | .1177539  | .4342191 | 0.27  | 0.786 | - |  |
|  |          | 3              | .0611953  | .270663  | 0.23  | 0.821 | -.4692944 | .591685  |         |                |           |          |       |       |   |  |
|  |          | 4              | -.1840912 | .2436136 | -0.76 | 0.450 | -         |          |         | .7332999       | .9688078  |          |       |       |   |  |
|  | .6615651 | .2933827       |           |          |       |       |           |          |         |                |           |          |       |       |   |  |
|  |          | 5              | .6184974  | .4217721 | 1.47  | 0.143 | -         |          |         | sg#yr          |           |          |       |       |   |  |
|  | .2081608 | 1.445156       |           |          |       |       |           |          |         | 1 1            | .7559106  | 1.201746 | 0.63  | 0.529 | - |  |
|  |          |                |           |          |       |       |           |          |         |                |           |          |       |       |   |  |
|  |          | ed             |           |          |       |       |           |          |         | 1 2            | -.1134044 | .6929083 | -0.16 | 0.870 | - |  |
|  |          | 2              | -.2800716 | .2134251 | -1.31 | 0.189 | -.698377  | .1382339 |         |                |           |          |       |       |   |  |
|  |          |                |           |          |       |       |           |          |         | 1 3            | -.5701252 | .6080146 | -0.94 | 0.348 | - |  |
|  |          |                |           |          |       |       |           |          |         |                |           |          |       |       |   |  |
|  |          |                |           |          |       |       |           |          |         | 1.761812       | .6215616  |          |       |       |   |  |

|                |                                                               |                                                   |
|----------------|---------------------------------------------------------------|---------------------------------------------------|
|                | 3   -.02529 .3758617 -0.07 0.946 -.7619654 .7113853           | 1 4   -.1529369 .5812277 -0.26 0.792 -            |
| .2809067       | 4   .5431136 .4204263 1.29 0.196 -                            | 1.292122 .9862486                                 |
|                |                                                               |                                                   |
|                | pov                                                           | age_group                                         |
|                | 2   .1568016 .2188591 0.72 0.474 -                            | 2   -.7760431 .6082261 -1.28 0.202 -              |
| .2721544       | .5857576                                                      | 1.968144 .4160581                                 |
|                | 3   .4146625 .2540164 1.63 0.103 -                            | 3   -.5796573 .5877958 -0.99 0.324 -              |
| .0832005       | .9125255                                                      | 1.731716 .5724014                                 |
|                | 4   .2567472 .2567622 1.00 0.317 -                            | 4   -.5895225 .6761549 -0.87 0.383 -              |
| .2464975       | .7599918                                                      | 1.914762 .7357168                                 |
|                |                                                               |                                                   |
|                | 1.acgge3   -.5785157 .2774364 -2.09 0.037 -1.122281 -.0347504 | race                                              |
|                | 1.female   -.8606736 .1675068 -5.14 0.000 -1.188981 -.5323663 | 2   -.388123 .8273418 -0.47 0.639 -               |
| 1.hypertension | -.5426591 .2207914 -2.46 0.014 -.9754023 -.1099158            | 2.009683 1.233437                                 |
| _cons          | -2.882227 .4346165 -6.63 0.000 -3.734059 -2.030394            | 3   -.0379152 .311015 -0.12 0.903 -               |
|                | -----+-----                                                   | .6474935 .571663                                  |
|                | /lnalpha                                                      | 4   .3492366 .4033844 0.87 0.387 -                |
|                | .2142134 .0143763 14.90 0.000 .1860363 .2423904               | .4413822 1.139855                                 |
|                | -----+-----                                                   | 5   1.101736 1.118069 0.99 0.324 -                |
|                | alpha   1.238887 .0178106 1.204466 1.274292                   | 1.089639 3.293111                                 |
|                |                                                               |                                                   |
|                |                                                               | ed                                                |
|                |                                                               | 2   .64808 .4335967 1.49 0.135 -                  |
|                |                                                               | .2017539 1.497914                                 |
|                |                                                               | 3   -.0635765 .6639759 -0.10 0.924 -              |
|                |                                                               | 1.364945 1.237792                                 |
|                |                                                               | 4   1.910026 .7239774 2.64 0.008                  |
|                |                                                               | .491056 3.328995                                  |
|                |                                                               |                                                   |
|                |                                                               | pov                                               |
|                |                                                               | 2   -.3100367 .4216689 -0.74 0.462 -              |
|                |                                                               | 1.136493 .5164192                                 |
|                |                                                               | 3   -.5767908 .4289469 -1.34 0.179 -              |
|                |                                                               | 1.417511 .2639296                                 |
|                |                                                               | 4   -.5389637 .5822057 -0.93 0.355 -              |
|                |                                                               | 1.680066 .6021385                                 |
|                |                                                               |                                                   |
|                |                                                               | 1.acgge3   -.2344092 .3537899 -0.66 0.508 -       |
|                |                                                               | .9278246 .4590063                                 |
|                |                                                               | 1.female   -.9558854 .3003114 -3.18 0.001 -       |
|                |                                                               | 1.544485 -.3672859                                |
|                |                                                               | 1.hypertension   -.5177437 .3231409 -1.60 0.109 - |
|                |                                                               | 1.151088 .1156009                                 |
|                |                                                               | _cons   -2.021291 .6928652 -2.92 0.004 -          |
|                |                                                               | 3.379282 -.6633005                                |
|                |                                                               | -----+-----                                       |
|                |                                                               | /lnalpha   .1619531 .0259081 6.25 0.000           |
|                |                                                               | .1111741 .2127322                                 |

|                         |           | alpha   1.175805 .0304629<br>1.117589 1.237053                                       |          |       |          |           |           |
|-------------------------|-----------|--------------------------------------------------------------------------------------|----------|-------|----------|-----------|-----------|
| <b>Laboratory Costs</b> |           | -----<br>lab_costs   Robust<br>Coef. Std. Err. z P> z  [95% Conf. Interval]<br>----- |          |       |          |           |           |
|                         | lab_costs | -----                                                                                |          |       |          |           |           |
|                         | yr        | -----                                                                                |          |       |          |           |           |
|                         | 1         | .6543112                                                                             | .0514338 | 12.72 | 0.000    | .5535028  | .7551195  |
|                         | 2         | .510148                                                                              | .0561491 | 9.09  | 0.000    | .4000979  | .6201982  |
|                         | 3         | .4809451                                                                             | .1080338 | 4.45  | 0.000    | .2692028  | .6926874  |
|                         | 4         | .318169                                                                              | .0880788 | 3.61  | 0.000    | .1455377  | .4908002  |
|                         | 1.sg      | .0844886                                                                             | .052728  | 1.60  | 0.109    | -.0188564 | .1878335  |
|                         | sg#yr     | -----                                                                                |          |       |          |           |           |
|                         | 1 1       | -.119187                                                                             | .0589063 | -2.02 | 0.043    | -.2346412 | -.0037329 |
|                         | 1 2       | -.1165968                                                                            | .0677714 | -1.72 | 0.085    | -.2494263 | .0162326  |
|                         | 1 3       | -.1598809                                                                            | .1179095 | -1.36 | 0.175    | -.3909792 | .0712175  |
|                         | 1 4       | .0129087                                                                             | .1119906 | 0.12  | 0.908    | -.2065888 | .2324061  |
|                         | age_group | -----                                                                                |          |       |          |           |           |
|                         | 2         | -.1240619                                                                            | .1006061 | -1.23 | 0.218    | -.3212462 | .0731225  |
|                         | 3         | -.1730604                                                                            | .1010661 | -1.71 | 0.087    | -.3711464 | .0250255  |
|                         | 4         | -.1375727                                                                            | .1000431 | -1.38 | 0.169    | -.3336536 | .0585082  |
|                         | race      | -----                                                                                |          |       |          |           |           |
|                         | 2         | -.126456                                                                             | .0848695 | -1.49 | 0.136    | -.2927972 | .0398852  |
|                         | 3         | .0204672                                                                             | .0419857 | 0.49  | 0.626    | -.0618232 | .1027577  |
|                         | 4         | .0264334                                                                             | .0543673 | 0.49  | 0.627    | -.0801245 | .1329913  |
|                         | 5         | .0716158                                                                             | .1621349 | 0.44  | 0.659    | -.2461627 | .3893944  |
|                         | ed        | -----                                                                                |          |       |          |           |           |
|                         | 2         | -.0022996                                                                            | .0503296 | -0.05 | 0.964    | -.1009438 | .0963446  |
|                         | 3         | .0407735                                                                             | .0673051 | 0.61  | 0.545    | -.0911422 | .1726892  |
|                         | 4         | -.2027472                                                                            | .1029343 | -1.97 | 0.049    | -.4044947 | -.0009997 |
|                         | pov       | -----                                                                                |          |       |          |           |           |
|                         | 2         | .0859617                                                                             | .0511911 | 1.68  | 0.093    | -.014371  | .1862943  |
|                         | 3         | .0593773                                                                             | .0487762 | 1.22  | 0.223    | -.0362223 | .1549769  |
|                         | 4         | .0680626                                                                             | .0627294 | 1.09  | 0.278    | -.0548848 | .1910099  |
| 1.acgge3                | .3573754  | .0360761                                                                             | 9.91     | 0.000 | .2866677 | .4280832  |           |
| 1.female                | .1927742  | .0438478                                                                             | 4.40     | 0.000 | .1068341 | .2787142  |           |
| 1.hypertension          | .0896938  | .0363785                                                                             | 2.47     | 0.014 | .0183933 | .1609944  |           |
| cons                    | 5.788467  | .1140478                                                                             | 50.75    | 0.000 | 5.564937 | 6.011996  |           |
|                         |           | -----<br>lab_costs   Robust<br>Coef. Std. Err. z P> z  [95% Conf. Interval]<br>----- |          |       |          |           |           |
|                         | lab_costs | -----                                                                                |          |       |          |           |           |
|                         | yr        | -----                                                                                |          |       |          |           |           |
|                         | 1         | .714406                                                                              | .081109  | 8.81  | 0.000    |           |           |
|                         | 2         | .4018225                                                                             | .0885895 | 4.54  | 0.000    |           |           |
|                         | 3         | .2961998                                                                             | .0936746 | 3.16  | 0.002    |           |           |
|                         | 4         | .21744                                                                               | .0922073 | 2.36  | 0.018    |           |           |
|                         | 1.sg      | .196472                                                                              | .0947578 | 2.07  | 0.038    |           |           |
|                         | sg#yr     | -----                                                                                |          |       |          |           |           |
|                         | 1 1       | -.0992007                                                                            | .108356  | -0.92 | 0.360    | -         | -         |
|                         | 1 2       | -.0747695                                                                            | .1203048 | -0.62 | 0.534    | -         | -         |
|                         | 1 3       | -.0796521                                                                            | .1264009 | -0.63 | 0.529    | -         | -         |
|                         | 1 4       | .0609012                                                                             | .1315611 | 0.46  | 0.643    | -         | -         |
|                         | age_group | -----                                                                                |          |       |          |           |           |
|                         | 2         | .1532045                                                                             | .2054688 | 0.75  | 0.456    | -         | -         |
|                         | 3         | .114744                                                                              | .1905635 | 0.60  | 0.547    | -         | -         |
|                         | 4         | .2456324                                                                             | .1898106 | 1.29  | 0.196    | -         | -         |
|                         | race      | -----                                                                                |          |       |          |           |           |
|                         | 2         | .4225373                                                                             | .2742105 | 1.54  | 0.123    | -         | -         |
|                         | 3         | .0922739                                                                             | .085115  | 1.08  | 0.278    | -         | -         |



|                |           |          |       |       |           |           |                                               |
|----------------|-----------|----------|-------|-------|-----------|-----------|-----------------------------------------------|
|                |           |          |       |       |           |           | 4   .0015828 .1230537 0.01 0.990 -            |
| inflate        |           |          |       |       |           |           | .2395981 .2427637                             |
| yr             |           |          |       |       |           |           | 5   -.5625088 .186767 -3.01 0.003 -           |
| 1              | -1.146851 | .178628  | -6.42 | 0.000 | -1.496956 | -.7967466 | .9285654 -.1964523                            |
| 2              | -.208396  | .1376768 | -1.51 | 0.130 | -.4782376 | .0614455  |                                               |
| 3              | .3453693  | .1459005 | 2.37  | 0.018 | .0594095  | .6313291  | ed                                            |
| 4              | .4394253  | .1517111 | 2.90  | 0.004 | .142077   | .7367736  | 2                                             |
| 1.sg           |           |          |       |       |           |           | -.1094275 .1002343 -1.09 0.275 -              |
| sg#yr          |           |          |       |       |           |           | .3058831 .0870281                             |
| 1 1            | .2096964  | .1952363 | 1.07  | 0.283 | -.1729596 | .5923525  | 3                                             |
| 1 2            | .3567769  | .1526478 | 2.34  | 0.019 | .0575927  | .655961   | -.4105837 .1505509 -2.73 0.006 -              |
| 1 3            | .2192747  | .1636082 | 1.34  | 0.180 | -.1013916 | .5399409  | 4                                             |
| 1 4            | .1422229  | .1769418 | 0.80  | 0.422 | -.2045765 | .4890224  | -.2166796 .162916 -1.33 0.184 -               |
| age_group      |           |          |       |       |           |           | .5359891 .1026298                             |
| 2              | .1763324  | .1401416 | 1.26  | 0.208 | -.0983402 | .451005   |                                               |
| 3              | .0448019  | .1385184 | 0.32  | 0.746 | -.2266892 | .316293   | pov                                           |
| 4              | -.0877634 | .1510705 | -0.58 | 0.561 | -.3838561 | .2083294  | 2                                             |
| race           |           |          |       |       |           |           | .2127004 .0893527 2.38 0.017                  |
| 2              | .0061637  | .1784682 | 0.03  | 0.972 | -.3436276 | .355955   | .3878285                                      |
| 3              | -.1659573 | .0879081 | -1.89 | 0.059 | -.338254  | .0063394  | 3                                             |
| 4              | -.0190746 | .0970106 | -0.20 | 0.844 | -.2092119 | .1710626  | .4038998 .1089802 3.71 0.000                  |
| 5              | -.1490092 | .2585861 | -0.58 | 0.564 | -.6558286 | .3578101  | 4                                             |
| ed             |           |          |       |       |           |           | .4291443 .1188116 3.61 0.000                  |
| 2              | .0035455  | .0885094 | 0.04  | 0.968 | -.1699297 | .1770206  | .6620108                                      |
| 3              | .29987    | .1300658 | 2.31  | 0.021 | .0449457  | .5547943  |                                               |
| 4              | .1540456  | .2066279 | 0.75  | 0.456 | -.2509376 | .5590287  | 1.acgge3                                      |
| pov            |           |          |       |       |           |           | .3766673 .0651947 5.78 0.000                  |
| 2              | .0525246  | .0928111 | 0.57  | 0.571 | -.1293817 | .234431   | .2488881 .5044464                             |
| 3              | .1182521  | .0997656 | 1.19  | 0.236 | -.0772849 | .313789   | 1.female                                      |
| 4              | -.0063422 | .1183861 | -0.05 | 0.957 | -.2383748 | .2256903  | .3067246 .0750785 4.09 0.000                  |
| 1.acgge3       |           |          |       |       |           |           | .1595735 .4538756                             |
| 1.female       |           |          |       |       |           |           | .0905037 .0660813 1.37 0.171 -                |
| 1.hypertension |           |          |       |       |           |           | .0390132 .2200207                             |
| _cons          |           |          |       |       |           |           | 5.093253 .2230815 22.83 0.000                 |
| _cons          |           |          |       |       |           |           | 4.656021 5.530485                             |
|                |           |          |       |       |           |           | -----+-----                                   |
|                |           |          |       |       |           |           | -----                                         |
| inflate        |           |          |       |       |           |           |                                               |
| yr             |           |          |       |       |           |           | yr                                            |
| 1              |           |          |       |       |           |           | 1                                             |
| -1.297668      |           |          |       |       |           |           | -.8811975 .212489 -4.15 0.000 -               |
| .8297736       |           |          |       |       |           |           | -.4647267                                     |
| .1347035       |           |          |       |       |           |           | 2                                             |
| .2441033       |           |          |       |       |           |           | -.4394802 .1991329 -2.21 0.027 -              |
| .284061        |           |          |       |       |           |           | -.0491868                                     |
| .7269453       |           |          |       |       |           |           | 3                                             |
| .5694265       |           |          |       |       |           |           | .3219254 .2329782 1.38 0.167 -                |
|                |           |          |       |       |           |           | .7785543                                      |
|                |           |          |       |       |           |           | 4                                             |
|                |           |          |       |       |           |           | .1395711 .1957558 0.71 0.476 -                |
|                |           |          |       |       |           |           | .5232454                                      |
|                |           |          |       |       |           |           |                                               |
|                |           |          |       |       |           |           | 1.sg                                          |
|                |           |          |       |       |           |           | .1007296 .1963253 0.51 0.608 -                |
|                |           |          |       |       |           |           | .4855202                                      |
|                |           |          |       |       |           |           |                                               |
|                |           |          |       |       |           |           | sg#yr                                         |
|                |           |          |       |       |           |           | 1 1                                           |
|                |           |          |       |       |           |           | -.1264513 .3063801 -0.41 0.680 -              |
|                |           |          |       |       |           |           | .4740426                                      |
|                |           |          |       |       |           |           | 1 2                                           |
|                |           |          |       |       |           |           | -.0253249 .277608 -0.09 0.927 -               |
|                |           |          |       |       |           |           | .5187767                                      |
|                |           |          |       |       |           |           | -----                                         |
| /lnalpha       |           |          |       |       |           |           | .0997812 .016799 5.94 0.000 .0668558 .1327066 |
| alpha          |           |          |       |       |           |           | 1.104929 .0185617 1.069141 1.141915           |

|  |  |          |                           |          |       |       |   |  |
|--|--|----------|---------------------------|----------|-------|-------|---|--|
|  |  | .8610541 | 1 3   -.2830594           | .2949007 | -0.96 | 0.337 | - |  |
|  |  |          | .2949353                  |          |       |       |   |  |
|  |  | .7548137 | 1 4   -.2295359           | .2680038 | -0.86 | 0.392 | - |  |
|  |  |          | .2957418                  |          |       |       |   |  |
|  |  |          |                           |          |       |       |   |  |
|  |  |          | age_group                 |          |       |       |   |  |
|  |  | .8736494 | 2   -.2858891             | .2998832 | -0.95 | 0.340 | - |  |
|  |  |          | .3018712                  |          |       |       |   |  |
|  |  | .6724497 | 3   -.1010193             | .2915515 | -0.35 | 0.729 | - |  |
|  |  |          | .4704111                  |          |       |       |   |  |
|  |  | .8031288 | 4   -.1890838             | .313294  | -0.60 | 0.546 | - |  |
|  |  |          | .4249612                  |          |       |       |   |  |
|  |  |          |                           |          |       |       |   |  |
|  |  |          | race                      |          |       |       |   |  |
|  |  | .7569595 | 2   -.1511814             | .3090761 | -0.49 | 0.625 | - |  |
|  |  |          | .4545967                  |          |       |       |   |  |
|  |  | .2886789 | 3   -.0008067             | .1468763 | -0.01 | 0.996 | - |  |
|  |  |          | .2870655                  |          |       |       |   |  |
|  |  | .345847  | 4   .071084               | .2127238 | 0.33  | 0.738 | - |  |
|  |  |          | .488015                   |          |       |       |   |  |
|  |  | .4769836 | 5   1.350665              | .445764  | 3.03  | 0.002 |   |  |
|  |  |          | 2.224346                  |          |       |       |   |  |
|  |  |          |                           |          |       |       |   |  |
|  |  |          | ed                        |          |       |       |   |  |
|  |  | .3403255 | 2   .023012               | .1853796 | 0.12  | 0.901 | - |  |
|  |  |          | .3863494                  |          |       |       |   |  |
|  |  | .2143801 | 3   .2584854              | .2412624 | 1.07  | 0.284 | - |  |
|  |  |          | .731351                   |          |       |       |   |  |
|  |  | .5248047 | 4   .4501678              | .4974441 | 0.90  | 0.365 | - |  |
|  |  |          | 1.42514                   |          |       |       |   |  |
|  |  |          |                           |          |       |       |   |  |
|  |  |          | pov                       |          |       |       |   |  |
|  |  | .5444314 | 2   -.2006706             | .1753914 | -1.14 | 0.253 | - |  |
|  |  |          | .1430901                  |          |       |       |   |  |
|  |  | .5095319 | 3   -.1805451             | .1678535 | -1.08 | 0.282 | - |  |
|  |  |          | .1484418                  |          |       |       |   |  |
|  |  | .2266681 | 4   .1935606              | .2144063 | 0.90  | 0.367 | - |  |
|  |  |          | .6137893                  |          |       |       |   |  |
|  |  |          |                           |          |       |       |   |  |
|  |  | .7743962 | 1.acggs3   -.4815896      | .1493939 | -3.22 | 0.001 | - |  |
|  |  |          | -.1887829                 |          |       |       |   |  |
|  |  | 1.08667  | 1.female   -.8324693      | .1296967 | -6.42 | 0.000 | - |  |
|  |  |          | -.5782685                 |          |       |       |   |  |
|  |  | .5133234 | 1.hypertension   -.243721 | .1375548 | -1.77 | 0.076 | - |  |
|  |  |          | .0258814                  |          |       |       |   |  |
|  |  | 1.292272 | _cons   -.6352278         | .3352326 | -1.89 | 0.058 | - |  |
|  |  |          | .021816                   |          |       |       |   |  |
|  |  | -----+   |                           |          |       |       |   |  |
|  |  | -----    |                           |          |       |       |   |  |

|                    |                                                                                                                                                                                                                                                                                                                                                                                                                                                                                                                                                                                                                                                                                                                                                                                                                                                                                                                                                                                                                                                                                                                                                                                                                                                                                                                                                                                                                                                                                                                            |                                                                                                                                                                                                                                                                                                                                                                                                                                                                                                                                                                                                                                                                                                                                                                                                                                                                                                    |
|--------------------|----------------------------------------------------------------------------------------------------------------------------------------------------------------------------------------------------------------------------------------------------------------------------------------------------------------------------------------------------------------------------------------------------------------------------------------------------------------------------------------------------------------------------------------------------------------------------------------------------------------------------------------------------------------------------------------------------------------------------------------------------------------------------------------------------------------------------------------------------------------------------------------------------------------------------------------------------------------------------------------------------------------------------------------------------------------------------------------------------------------------------------------------------------------------------------------------------------------------------------------------------------------------------------------------------------------------------------------------------------------------------------------------------------------------------------------------------------------------------------------------------------------------------|----------------------------------------------------------------------------------------------------------------------------------------------------------------------------------------------------------------------------------------------------------------------------------------------------------------------------------------------------------------------------------------------------------------------------------------------------------------------------------------------------------------------------------------------------------------------------------------------------------------------------------------------------------------------------------------------------------------------------------------------------------------------------------------------------------------------------------------------------------------------------------------------------|
|                    |                                                                                                                                                                                                                                                                                                                                                                                                                                                                                                                                                                                                                                                                                                                                                                                                                                                                                                                                                                                                                                                                                                                                                                                                                                                                                                                                                                                                                                                                                                                            | <pre> /lnalpha   .0866247 .0358974 2.41 0.016 .0162672 .1569823 -----+----- alpha   1.090487 .0391456 1.0164 1.169975 -----+----- </pre>                                                                                                                                                                                                                                                                                                                                                                                                                                                                                                                                                                                                                                                                                                                                                           |
| Office Visit Costs | <pre> -----+----- office_vst_costs   Robust Coef. Std. Err. z P&gt; z  [95% Conf. Interval] -----+----- office_vst_costs   yr   1   .075219 .0340176 2.21 0.027 .0085457 .1418923 2   .0480531 .0361069 1.33 0.183 -.0227152 .1188213 3   .0331293 .0439789 0.75 0.451 -.0530678 .1193264 4   .0907001 .0683672 1.33 0.185 -.0432972 .2246974 1.sg   .0073287 .0360242 0.20 0.839 -.0632774 .0779348 sg#yr   1 1   -.0417355 .0379619 -1.10 0.272 -.1161395 .0326685 1 2   -.0085339 .0422667 -0.20 0.840 -.0913751 .0743074 1 3   -.0050072 .0519745 -0.10 0.923 -.1068754 .096861 1 4   -.0465237 .0792093 -0.59 0.557 -.2017711 .1087237 age_group   2   -.0359688 .0546167 -0.66 0.510 -.1430156 .071078 3   -.0134491 .055215 -0.24 0.808 -.1216685 .0947703 4   .0307841 .0539735 0.57 0.568 -.0750021 .1365703 race   2   -.1154 .0573267 -2.01 0.044 -.2277583 -.0030416 3   .0238739 .0317576 0.75 0.452 -.0383699 .0861176 4   -.0528301 .0446994 -1.18 0.237 -.1404393 .0347792 5   .1921688 .1616374 1.19 0.234 -.1246347 .5089723 ed   2   -.1223388 .0338144 -3.62 0.000 -.1886138 -.0560639 3   -.1077054 .0477258 -2.26 0.024 -.2012463 -.0141646 4   -.2989755 .0923671 -3.24 0.001 -.4800116 -.1179393 pov   2   -.0085615 .0402488 -0.21 0.832 -.0874478 .0703248 3   -.0148553 .0414081 -0.36 0.720 -.0960138 .0663032 4   .0440425 .0485688 0.91 0.365 -.0511506 .1392356 1.acgge3   .4346333 .0271146 16.03 0.000 .3814897 .4877769 1.female   .2120518 .0324733 6.53 0.000 .1484052 .2756983 </pre> | <pre> -----+----- office_vst_costs   Robust Conf. Interval] Coef. Std. Err. z P&gt; z  [95% -----+----- office_vst_costs   yr   1   -.0607606 .0654769 -0.93 0.353 - .189093 .0675719 2   -.1575532 .064687 -2.44 0.015 - .2843375 -.030769 3   -.171027 .0638627 -2.68 0.007 - .2961956 -.0458584 4   -.0911155 .0601077 -1.52 0.130 - .2089245 .0266935 1.sg   -.0178674 .0652206 -0.27 0.784 - .1456975 .1099626 sg#yr   1 1   .0667921 .081787 0.82 0.414 - .0935075 .2270916 1 2   .0512234 .0832348 0.62 0.538 - .1119138 .2143607 1 3   -.0190284 .0830361 -0.23 0.819 - .1817761 .1437193 1 4   .0175208 .0802448 0.22 0.827 - .1397561 .1747976 age_group   2   .0977376 .1129564 0.87 0.387 - .1236528 .319128 3   .1559018 .104499 1.49 0.136 - .0489125 .360716 4   .2084051 .1071351 1.95 0.052 - .0015757 .418386 race   2   .0981403 .2158659 0.45 0.649 - .3249492 .5212298 </pre> |

|                                                                    |  |  |  |  |  |  |                                               |  |  |  |  |  |  |
|--------------------------------------------------------------------|--|--|--|--|--|--|-----------------------------------------------|--|--|--|--|--|--|
|                                                                    |  |  |  |  |  |  |                                               |  |  |  |  |  |  |
| 1.hypertension   .1367799 .0288606 4.74 0.000 .0802143 .1933456    |  |  |  |  |  |  | 3   .0618011 .0615591 1.00 0.315 -            |  |  |  |  |  |  |
| _cons   6.352741 .0709954 89.48 0.000 6.213593 6.49189             |  |  |  |  |  |  | .0588524 .1824547                             |  |  |  |  |  |  |
| -----+-----                                                        |  |  |  |  |  |  | 4   -.1277594 .0871183 -1.47 0.143 -          |  |  |  |  |  |  |
| inflate                                                            |  |  |  |  |  |  | .2985081 .0429894                             |  |  |  |  |  |  |
| yr                                                                 |  |  |  |  |  |  | 5   -.2065822 .229941 -0.90 0.369 -           |  |  |  |  |  |  |
| 1   -1.242991 .2900438 -4.29 0.000 -1.811466 -.6745152             |  |  |  |  |  |  | .6572583 .2440939                             |  |  |  |  |  |  |
| 2   -.0765658 .170181 -0.45 0.653 -.4101144 .2569829               |  |  |  |  |  |  |                                               |  |  |  |  |  |  |
| 3   .5250541 .2227645 2.36 0.018 .0884437 .9616646                 |  |  |  |  |  |  | ed                                            |  |  |  |  |  |  |
| 4   .5109197 .2230448 2.29 0.022 .07376 .9480795                   |  |  |  |  |  |  | 2   -.1371049 .0709971 -1.93 0.053 -          |  |  |  |  |  |  |
| 1.sg   -.0096824 .1508411 -0.06 0.949 -.3053255 .2859606           |  |  |  |  |  |  | .2762565 .0020468                             |  |  |  |  |  |  |
| sg#yr                                                              |  |  |  |  |  |  | 3   -.3566859 .0958916 -3.72 0.000 -          |  |  |  |  |  |  |
| 1 1   -.0265249 .3211038 -0.08 0.934 -.6558769 .6028271            |  |  |  |  |  |  | .5446299 -.1687418                            |  |  |  |  |  |  |
| 1 2   .1295696 .1937029 0.67 0.504 -.2500811 .5092202              |  |  |  |  |  |  | 4   -.5391232 .1366557 -3.95 0.000 -          |  |  |  |  |  |  |
| 1 3   -.0186387 .2430863 -0.08 0.939 -.495079 .4578016             |  |  |  |  |  |  | .8069635 -.2712829                            |  |  |  |  |  |  |
| 1 4   .0723802 .2530549 0.29 0.775 -.4235983 .5683588              |  |  |  |  |  |  |                                               |  |  |  |  |  |  |
|                                                                    |  |  |  |  |  |  | pov                                           |  |  |  |  |  |  |
| age_group                                                          |  |  |  |  |  |  | 2   .0656184 .0826018 0.79 0.427 -            |  |  |  |  |  |  |
| 2   .0581127 .1668062 0.35 0.728 -.2688215 .3850469                |  |  |  |  |  |  | .0962781 .2275149                             |  |  |  |  |  |  |
| 3   -.2542378 .1726173 -1.47 0.141 -.5925614 .0840858              |  |  |  |  |  |  | 3   .0811099 .0813158 1.00 0.319 -            |  |  |  |  |  |  |
| 4   -.238496 .2206506 -1.08 0.280 -.6709632 .1939713               |  |  |  |  |  |  | .0782662 .2404859                             |  |  |  |  |  |  |
|                                                                    |  |  |  |  |  |  | 4   .2475778 .0954419 2.59 0.009              |  |  |  |  |  |  |
| race                                                               |  |  |  |  |  |  | .0605152 .4346404                             |  |  |  |  |  |  |
| 2   .2561673 .2350851 1.09 0.276 -.2045911 .7169257                |  |  |  |  |  |  |                                               |  |  |  |  |  |  |
| 3   -.0068203 .123037 -0.06 0.956 -.2479685 .2343278               |  |  |  |  |  |  | 1.acgge3   .4370788 .0631562 6.92 0.000       |  |  |  |  |  |  |
| 4   .1722662 .2075134 0.83 0.406 -.2344526 .578985                 |  |  |  |  |  |  | .3132949 .5608627                             |  |  |  |  |  |  |
| 5   .1930246 .318762 0.61 0.545 -.4317375 .8177867                 |  |  |  |  |  |  | 1.female   .3495951 .0561137 6.23 0.000       |  |  |  |  |  |  |
|                                                                    |  |  |  |  |  |  | .2396143 .4595759                             |  |  |  |  |  |  |
| ed                                                                 |  |  |  |  |  |  | 1.hypertension   .1225266 .0574756 2.13 0.033 |  |  |  |  |  |  |
| 2   -.1120654 .1152337 -0.97 0.331 -.3379193 .1137884              |  |  |  |  |  |  | .0098764 .2351768                             |  |  |  |  |  |  |
| 3   .1761718 .2360263 0.75 0.455 -.2864312 .6387749                |  |  |  |  |  |  | _cons   6.101667 .1317774 46.30 0.000         |  |  |  |  |  |  |
| 4   .0973318 .258735 0.38 0.707 -.4097795 .6044431                 |  |  |  |  |  |  | 5.843388 6.359946                             |  |  |  |  |  |  |
|                                                                    |  |  |  |  |  |  | -----+-----                                   |  |  |  |  |  |  |
| pov                                                                |  |  |  |  |  |  | inflate                                       |  |  |  |  |  |  |
| 2   .1318328 .1642655 0.80 0.422 -.1901218 .4537873                |  |  |  |  |  |  | yr                                            |  |  |  |  |  |  |
| 3   .3337268 .163095 2.05 0.041 .0140664 .6533871                  |  |  |  |  |  |  | 1   -1.40052 .3042071 -4.60 0.000 -           |  |  |  |  |  |  |
| 4   .1493999 .1817465 0.82 0.411 -.2068167 .5056166                |  |  |  |  |  |  | 1.996755 -.8042848                            |  |  |  |  |  |  |
| 1.acgge3   -.5400312 .1224451 -4.41 0.000 -.7800192 -.3000433      |  |  |  |  |  |  | 2   -.7259542 .2442252 -2.97 0.003 -          |  |  |  |  |  |  |
| 1.female   -.6752906 .1002319 -6.74 0.000 -.8717415 -.4788397      |  |  |  |  |  |  | 1.204627 -.2472816                            |  |  |  |  |  |  |
| 1.hypertension   -.3907099 .1134496 -3.44 0.001 -.613067 -.1683528 |  |  |  |  |  |  | 3   -.3423549 .2491203 -1.37 0.169 -          |  |  |  |  |  |  |
| _cons   -1.680289 .2491992 -6.74 0.000 -2.168711 -1.191868         |  |  |  |  |  |  | .8306218 .1459119                             |  |  |  |  |  |  |
|                                                                    |  |  |  |  |  |  | 4   -.027969 .2714447 -0.10 0.918 -           |  |  |  |  |  |  |
| /lnalpha   -.4395678 .0171343 -25.65 0.000 -.4731504 -.4059853     |  |  |  |  |  |  | .5599909 .5040529                             |  |  |  |  |  |  |
|                                                                    |  |  |  |  |  |  |                                               |  |  |  |  |  |  |
| alpha   .6443148 .0110399 .6230363 .66632                          |  |  |  |  |  |  | 1.sg   -.0943531 .251862 -0.37 0.708 -        |  |  |  |  |  |  |
| -----+-----                                                        |  |  |  |  |  |  | .5879935 .3992873                             |  |  |  |  |  |  |
|                                                                    |  |  |  |  |  |  |                                               |  |  |  |  |  |  |
|                                                                    |  |  |  |  |  |  | sg#yr                                         |  |  |  |  |  |  |
|                                                                    |  |  |  |  |  |  | 1 1   .2388709 .4575379 0.52 0.602 -          |  |  |  |  |  |  |
|                                                                    |  |  |  |  |  |  | .6578869 1.135629                             |  |  |  |  |  |  |

|          |           |  |                |           |          |       |       |   |
|----------|-----------|--|----------------|-----------|----------|-------|-------|---|
|          |           |  | 1 2            | .2103389  | .3709372 | 0.57  | 0.571 | - |
| .5166847 | .9373625  |  |                |           |          |       |       |   |
|          |           |  | 1 3            | .0094246  | .3637818 | 0.03  | 0.979 | - |
| .7035746 | .7224238  |  |                |           |          |       |       |   |
|          |           |  | 1 4            | -.183647  | .3754756 | -0.49 | 0.625 | - |
| .9195656 | .5522717  |  |                |           |          |       |       |   |
|          |           |  |                |           |          |       |       |   |
|          |           |  | age_group      |           |          |       |       |   |
|          |           |  | 2              | -.3685856 | .3869402 | -0.95 | 0.341 | - |
| 1.126974 | .3898034  |  |                |           |          |       |       |   |
|          |           |  | 3              | -.4789782 | .3833776 | -1.25 | 0.212 | - |
| 1.230385 | .2724282  |  |                |           |          |       |       |   |
|          |           |  | 4              | -.4778044 | .4123968 | -1.16 | 0.247 | - |
| 1.286087 | .3304785  |  |                |           |          |       |       |   |
|          |           |  |                |           |          |       |       |   |
|          |           |  | race           |           |          |       |       |   |
|          |           |  | 2              | .2532863  | .3971284 | 0.64  | 0.524 | - |
| .525071  | 1.031644  |  |                |           |          |       |       |   |
|          |           |  | 3              | -.1237677 | .1893061 | -0.65 | 0.513 | - |
| .4948008 | .2472655  |  |                |           |          |       |       |   |
|          |           |  | 4              | .1707448  | .2612721 | 0.65  | 0.513 | - |
| .3413391 | .6828286  |  |                |           |          |       |       |   |
|          |           |  | 5              | 1.640979  | .5146359 | 3.19  | 0.001 |   |
| .6323112 | 2.649647  |  |                |           |          |       |       |   |
|          |           |  |                |           |          |       |       |   |
|          |           |  | ed             |           |          |       |       |   |
|          |           |  | 2              | -.0302427 | .2298874 | -0.13 | 0.895 | - |
| .4808137 | .4203283  |  |                |           |          |       |       |   |
|          |           |  | 3              | .0526961  | .2934373 | 0.18  | 0.857 | - |
| .5224304 | .6278226  |  |                |           |          |       |       |   |
|          |           |  | 4              | .3763782  | .4484805 | 0.84  | 0.401 | - |
| .5026273 | 1.255384  |  |                |           |          |       |       |   |
|          |           |  |                |           |          |       |       |   |
|          |           |  | pov            |           |          |       |       |   |
|          |           |  | 2              | .1418385  | .2662611 | 0.53  | 0.594 | - |
| .3800237 | .6637007  |  |                |           |          |       |       |   |
|          |           |  | 3              | .1552389  | .2402878 | 0.65  | 0.518 | - |
| .3157165 | .6261943  |  |                |           |          |       |       |   |
|          |           |  | 4              | .6339783  | .3061852 | 2.07  | 0.038 |   |
| .0338664 | 1.23409   |  |                |           |          |       |       |   |
|          |           |  |                |           |          |       |       |   |
|          |           |  | 1.acgge3       | -.4091297 | .2140094 | -1.91 | 0.056 | - |
| .8285805 | .0103211  |  |                |           |          |       |       |   |
|          |           |  | 1.female       | -.8177007 | .1746598 | -4.68 | 0.000 | - |
| 1.160028 | -.4753738 |  |                |           |          |       |       |   |
|          |           |  | 1.hypertension | -.3437229 | .1780099 | -1.93 | 0.053 | - |
| .6926159 | .0051702  |  |                |           |          |       |       |   |
|          |           |  | _cons          | -1.212779 | .4521288 | -2.68 | 0.007 | - |
| 2.098935 | -.3266227 |  |                |           |          |       |       |   |

|                        |                                                                                                                                                                                                                                                                                                                                                                                                                                                                                                                                                                                                                                                                                                                                                                                                                                                                                                                                                                                                                                                                                                                                                                                                                                                                                                                                                                              |                                                                                                                                                                                                                                                                                                                                                                                                                                                                                                                                                                                                                                                                                                                                                                                                                                      |
|------------------------|------------------------------------------------------------------------------------------------------------------------------------------------------------------------------------------------------------------------------------------------------------------------------------------------------------------------------------------------------------------------------------------------------------------------------------------------------------------------------------------------------------------------------------------------------------------------------------------------------------------------------------------------------------------------------------------------------------------------------------------------------------------------------------------------------------------------------------------------------------------------------------------------------------------------------------------------------------------------------------------------------------------------------------------------------------------------------------------------------------------------------------------------------------------------------------------------------------------------------------------------------------------------------------------------------------------------------------------------------------------------------|--------------------------------------------------------------------------------------------------------------------------------------------------------------------------------------------------------------------------------------------------------------------------------------------------------------------------------------------------------------------------------------------------------------------------------------------------------------------------------------------------------------------------------------------------------------------------------------------------------------------------------------------------------------------------------------------------------------------------------------------------------------------------------------------------------------------------------------|
|                        |                                                                                                                                                                                                                                                                                                                                                                                                                                                                                                                                                                                                                                                                                                                                                                                                                                                                                                                                                                                                                                                                                                                                                                                                                                                                                                                                                                              | <pre> -----+----- /lnalpha   -.4439185 .0326648 -13.59 0.000 - .5079403 -.3798968 -----+----- alpha   .6415177 .020955 .6017337 -----+----- </pre>                                                                                                                                                                                                                                                                                                                                                                                                                                                                                                                                                                                                                                                                                   |
| <b>Radiology Costs</b> | <pre> -----+----- radio_costs   Robust Coef. Std. Err. z P&gt; z  [95% Conf. Interval] -----+----- radio_costs   yr   1   -.0983777 .0578583 -1.70 0.089 -.2117779 .0150225 2   .1054298 .0741645 1.42 0.155 -.03993 .2507897 3   .0726061 .0812 0.89 0.371 -.086543 .2317552 4   .081345 .0952008 0.85 0.393 -.1052451 .2679352 1.sg   .067767 .0561294 1.21 0.227 -.0422447 .1777786 sg#yr   1 1   -.0167109 .0714787 -0.23 0.815 -.1568067 .1233849 1 2   -.0602862 .0881316 -0.68 0.494 -.2330211 .1124486 1 3   -.0351873 .0976163 -0.36 0.718 -.2265117 .156137 1 4   .0498874 .123319 0.40 0.686 -.1918134 .2915882 age_group   2   .1172367 .0826326 1.42 0.156 -.0447202 .2791935 3   -.0268034 .0794243 -0.34 0.736 -.1824722 .1288653 4   .0853917 .0799103 1.07 0.285 -.0712297 .242013 race   2   -.118746 .0965353 -1.23 0.219 -.3079518 .0704598 3   -.0073602 .0436332 -0.17 0.866 -.0928798 .0781594 4   -.0061193 .0644619 -0.09 0.924 -.1324623 .1202236 5   -.2268979 .086144 -2.63 0.008 -.395737 -.0580588 ed   2   .0138034 .053446 0.26 0.796 -.0909488 .1185556 3   -.0362485 .0948081 -0.38 0.702 -.222069 .1495719 4   -.2000782 .1555689 -1.29 0.198 -.5049876 .1048312 pov   2   .0284413 .0505201 0.56 0.573 -.0705764 .1274589 3   .0803888 .0530246 1.52 0.130 -.0235376 .1843152 4   .0799327 .0696743 1.15 0.251 -.0566264 .2164919 </pre> | <pre> -----+----- radio_costs   Robust Coef. Std. Err. z P&gt; z  [95% Conf. Interval] -----+----- radio_costs   yr   1   -.1431256 .1140516 -1.25 0.210 - .3666625 .0804114 2   -.0340264 .1302871 -0.26 0.794 - .2893846 .2213317 3   -.1210278 .1189006 -1.02 0.309 - .3540687 .1120132 4   -.1590116 .1201398 -1.32 0.186 - .3944812 .076458 1.sg   -.0542706 .1148993 -0.47 0.637 - .2794691 .1709279 sg#yr   1 1   .1725097 .1572818 1.10 0.273 - .1357569 .4807763 1 2   .1360493 .1730008 0.79 0.432 - .203026 .4751247 1 3   -.0753803 .1537864 -0.49 0.624 - .376796 .2260354 1 4   .1641649 .1555938 1.06 0.291 - .1407935 .4691232 age_group   2   .2485602 .222039 1.12 0.263 - .1866283 .6837488 3   .1692763 .2109729 0.80 0.422 - .244223 .5827756 4   .2919947 .2158008 1.35 0.176 - .130967 .7149565 race   </pre> |



|          |  |  |                |           |          |        |       |   |
|----------|--|--|----------------|-----------|----------|--------|-------|---|
|          |  |  | 1 1            | -.4383713 | .2145264 | -2.04  | 0.041 | - |
| .8588353 |  |  | -0179072       |           |          |        |       |   |
|          |  |  | 1 2            | -.0381924 | .2225686 | -0.17  | 0.864 | - |
| .4744188 |  |  | .398034        |           |          |        |       |   |
|          |  |  | 1 3            | -.1982063 | .2201113 | -0.90  | 0.368 | - |
| .6296166 |  |  | .2332039       |           |          |        |       |   |
|          |  |  | 1 4            | -.2929149 | .2230734 | -1.31  | 0.189 | - |
| .7301307 |  |  | .144301        |           |          |        |       |   |
|          |  |  |                |           |          |        |       |   |
|          |  |  | age_group      |           |          |        |       |   |
|          |  |  | 2              | .0338561  | .1876332 | 0.18   | 0.857 | - |
| .3338983 |  |  | .4016104       |           |          |        |       |   |
|          |  |  | 3              | -.5854634 | .1962059 | -2.98  | 0.003 | - |
| .9700199 |  |  | -.2009069      |           |          |        |       |   |
|          |  |  | 4              | -.729994  | .2013716 | -3.63  | 0.000 | - |
| 1.124675 |  |  | -.3353128      |           |          |        |       |   |
|          |  |  |                |           |          |        |       |   |
|          |  |  | race           |           |          |        |       |   |
|          |  |  | 2              | .0276067  | .2440437 | 0.11   | 0.910 | - |
| .4507102 |  |  | .5059236       |           |          |        |       |   |
|          |  |  | 3              | .155929   | .1192453 | 1.31   | 0.191 | - |
| .0777874 |  |  | .3896455       |           |          |        |       |   |
|          |  |  | 4              | .0309156  | .1646068 | 0.19   | 0.851 | - |
| .2917078 |  |  | .353539        |           |          |        |       |   |
|          |  |  | 5              | .7972653  | .4175088 | 1.91   | 0.056 | - |
| .0210369 |  |  | 1.615567       |           |          |        |       |   |
|          |  |  |                |           |          |        |       |   |
|          |  |  | ed             |           |          |        |       |   |
|          |  |  | 2              | -.0061203 | .1308988 | -0.05  | 0.963 | - |
| .2626773 |  |  | .2504367       |           |          |        |       |   |
|          |  |  | 3              | .2014592  | .2210595 | 0.91   | 0.362 | - |
| .2318095 |  |  | .6347278       |           |          |        |       |   |
|          |  |  | 4              | -.0066987 | .407727  | -0.02  | 0.987 | - |
| .8058289 |  |  | .7924315       |           |          |        |       |   |
|          |  |  |                |           |          |        |       |   |
|          |  |  | pov            |           |          |        |       |   |
|          |  |  | 2              | -.1208735 | .1562761 | -0.77  | 0.439 | - |
| .4271691 |  |  | .1854221       |           |          |        |       |   |
|          |  |  | 3              | -.3216546 | .1540776 | -2.09  | 0.037 | - |
| .6236412 |  |  | -.019668       |           |          |        |       |   |
|          |  |  | 4              | -.1566263 | .2035231 | -0.77  | 0.442 | - |
| .5555242 |  |  | .2422716       |           |          |        |       |   |
|          |  |  |                |           |          |        |       |   |
|          |  |  | 1.acgge3       | -.4265006 | .1204854 | -3.54  | 0.000 | - |
| .6626477 |  |  | -.1903536      |           |          |        |       |   |
|          |  |  | 1.female       | -1.142403 | .1097766 | -10.41 | 0.000 | - |
| 1.357562 |  |  | -.9272452      |           |          |        |       |   |
|          |  |  | 1.hypertension | -.1208232 | .1089897 | -1.11  | 0.268 | - |
| .3344392 |  |  | .0927928       |           |          |        |       |   |



|                         |                                                                                                                                                                                                                                                                                                                                                                                                                                                                                                                                                                                                                                                                                                                                                                                                                                                                                                                                                                                                                                                                                                                                                                                                                                                                                                                                                                                                                                                             |                                                                                                                                                                                                                                                                                                                                                                                                                                                                                                                                                                                                                                                                                                                                                                                                                                                                            |
|-------------------------|-------------------------------------------------------------------------------------------------------------------------------------------------------------------------------------------------------------------------------------------------------------------------------------------------------------------------------------------------------------------------------------------------------------------------------------------------------------------------------------------------------------------------------------------------------------------------------------------------------------------------------------------------------------------------------------------------------------------------------------------------------------------------------------------------------------------------------------------------------------------------------------------------------------------------------------------------------------------------------------------------------------------------------------------------------------------------------------------------------------------------------------------------------------------------------------------------------------------------------------------------------------------------------------------------------------------------------------------------------------------------------------------------------------------------------------------------------------|----------------------------------------------------------------------------------------------------------------------------------------------------------------------------------------------------------------------------------------------------------------------------------------------------------------------------------------------------------------------------------------------------------------------------------------------------------------------------------------------------------------------------------------------------------------------------------------------------------------------------------------------------------------------------------------------------------------------------------------------------------------------------------------------------------------------------------------------------------------------------|
|                         |                                                                                                                                                                                                                                                                                                                                                                                                                                                                                                                                                                                                                                                                                                                                                                                                                                                                                                                                                                                                                                                                                                                                                                                                                                                                                                                                                                                                                                                             | <pre> _cons   .8198194 .2486932 3.30 0.001 .3323896 1.307249 -----+----- /lnalpha   .2842487 .0278381 10.21 0.000 .2296871 .3388104 -----+----- alpha   1.328763 .0369902 1.258206 1.403277 -----+----- </pre>                                                                                                                                                                                                                                                                                                                                                                                                                                                                                                                                                                                                                                                             |
| Prescription Drug Costs | <pre> -----+-----                 Robust rx_costs     Coef. Std. Err. z P&gt; z  [95% Conf. Interval] -----+----- rx_costs   yr     1   -.1705342 .0621566 -2.74 0.006  -.2923589  -.0487096   2   -.3126355 .0623696 -5.01 0.000  -.4348777  -.1903932   3   -.2055652 .0963439 -2.13 0.033  -.3943958  -.0167347   4   -.3460955 .0893955 -3.87 0.000  -.5213075  -.1708834   1.sg   -.0256996 .054775  -0.47 0.639  -.1330566  .0816575   sg#yr     1 1   .0136664 .06894  0.20 0.843  -.1214535  .1487863   1 2   .0929177 .0723936  1.28 0.199  -.0489712  .2348065   1 3   .0727215 .1089194  0.67 0.504  -.1407566  .2861995   1 4   .3622989 .1163677  3.11 0.002  .1342225  .5903754   age_group     2   .1730073 .1115103  1.55 0.121  -.0455488  .3915634   3   .4080288 .1108722  3.68 0.000  .1907232  .6253344   4   .643412 .1121419  5.74 0.000  .4236179  .8632061   race     2   -.540495 .138831  -3.89 0.000  -.8125988  -.2683912   3   -.0668713 .0555468  -1.20 0.229  -.1757411  .0419984   4   -.0861764 .1090604  -0.79 0.429  -.2999309  .127578   5   .239019 .2177391  1.10 0.272  -.1877419  .6657798   ed     2   .001827 .0703741  0.03 0.979  -.1361038  .1397577   3   .039085 .1313906  0.30 0.766  -.2184359  .2966059   4   -.2839548 .1403927  -2.02 0.043  -.5591195  -.0087901   pov     2   -.0728461 .0792271  -0.92 0.358  -.2281283  .0824361   3   -.0728087 .0786578  -0.93 0.355  -.2269752  .0813579 </pre> | <pre> -----+-----                 Robust rx_costs     Coef. Std. Err. z P&gt; z  [95% Conf. Interval] -----+----- rx_costs   yr     1   -.4937288 .0873498 -5.65 0.000  - .6649314 -.3225263   2   -.4857936 .0923106 -5.26 0.000  - .666719 -.3048681   3   -.5169813 .0837744 -6.17 0.000  - .681176 -.3527865   4   -.5006418 .0843357 -5.94 0.000  - .6659367 -.3353469   1.sg   -.0515433 .1058807 -0.49 0.626  - .2590656 .1559791   sg#yr     1 1   .1455683 .1085746  1.34 0.180  - .067234 .3583706   1 2   .1513027 .1208193  1.25 0.210  - .0854989 .3881043   1 3   .2440906 .1148455  2.13 0.034 .0189976 .4691836   1 4   .3239843 .129067  2.51 0.012 .0710177 .576951   age_group     2   .4035405 .2759293  1.46 0.144  - .137271 .944352   3   .5901417 .263868  2.24 0.025 .07297 1.107313   4   .8408937 .2640814  3.18 0.001 .3233037 1.358484 </pre> |

|                |  |           |          |       |       |           |           |  |  |  |  |  |  |  |  |
|----------------|--|-----------|----------|-------|-------|-----------|-----------|--|--|--|--|--|--|--|--|
| 4              |  | -.041682  | .1000666 | -0.42 | 0.677 | -.2378089 | .154445   |  |  |  |  |  |  |  |  |
| 1.acgge3       |  | .7713473  | .0567981 | 13.58 | 0.000 | .6600251  | .8826695  |  |  |  |  |  |  |  |  |
| 1.female       |  | .0330443  | .0629273 | 0.53  | 0.600 | -.0902909 | .1563795  |  |  |  |  |  |  |  |  |
| 1.hypertension |  | .360518   | .0608027 | 5.93  | 0.000 | .2413469  | .4796891  |  |  |  |  |  |  |  |  |
| _cons          |  | 6.943843  | .1308055 | 53.09 | 0.000 | 6.687469  | 7.200217  |  |  |  |  |  |  |  |  |
| -----          |  |           |          |       |       |           |           |  |  |  |  |  |  |  |  |
| inflate        |  |           |          |       |       |           |           |  |  |  |  |  |  |  |  |
| yr             |  |           |          |       |       |           |           |  |  |  |  |  |  |  |  |
| 1              |  | -.505468  | .2194586 | -2.30 | 0.021 | -.9355989 | -.075337  |  |  |  |  |  |  |  |  |
| 2              |  | .4244897  | .169056  | 2.51  | 0.012 | .0931461  | .7558333  |  |  |  |  |  |  |  |  |
| 3              |  | .5050154  | .2113501 | 2.39  | 0.017 | .0907767  | .919254   |  |  |  |  |  |  |  |  |
| 4              |  | .956283   | .2309828 | 4.14  | 0.000 | .5035651  | 1.409001  |  |  |  |  |  |  |  |  |
| 1.sg           |  | .0145546  | .1806388 | 0.08  | 0.936 | -.3394909 | .3686     |  |  |  |  |  |  |  |  |
| sg#yr          |  |           |          |       |       |           |           |  |  |  |  |  |  |  |  |
| 1 1            |  | -.076541  | .2480205 | -0.31 | 0.758 | -.5626522 | .4095701  |  |  |  |  |  |  |  |  |
| 1 2            |  | -.0050212 | .1921875 | -0.03 | 0.979 | -.3817018 | .3716594  |  |  |  |  |  |  |  |  |
| 1 3            |  | .037652   | .2360213 | 0.16  | 0.873 | -.4249414 | .5002453  |  |  |  |  |  |  |  |  |
| 1 4            |  | -.5833993 | .2690681 | -2.17 | 0.030 | -1.110763 | -.0560354 |  |  |  |  |  |  |  |  |
| age_group      |  |           |          |       |       |           |           |  |  |  |  |  |  |  |  |
| 2              |  | -.1558493 | .2272273 | -0.69 | 0.493 | -.6012067 | .2895081  |  |  |  |  |  |  |  |  |
| 3              |  | -.3797634 | .2319951 | -1.64 | 0.102 | -.8344654 | .0749386  |  |  |  |  |  |  |  |  |
| 4              |  | -.3117255 | .266259  | -1.17 | 0.242 | -.8335835 | .2101326  |  |  |  |  |  |  |  |  |
| race           |  |           |          |       |       |           |           |  |  |  |  |  |  |  |  |
| 2              |  | .0392341  | .2924877 | 0.13  | 0.893 | -.5340313 | .6124995  |  |  |  |  |  |  |  |  |
| 3              |  | .2441256  | .1513714 | 1.61  | 0.107 | -.0525569 | .5408081  |  |  |  |  |  |  |  |  |
| 4              |  | .40644    | .196502  | 2.07  | 0.039 | .0213032  | .7915769  |  |  |  |  |  |  |  |  |
| 5              |  | 1.187303  | .5266897 | 2.25  | 0.024 | .1550105  | 2.219596  |  |  |  |  |  |  |  |  |
| ed             |  |           |          |       |       |           |           |  |  |  |  |  |  |  |  |
| 2              |  | .2681747  | .1735859 | 1.54  | 0.122 | -.0720474 | .6083967  |  |  |  |  |  |  |  |  |
| 3              |  | .1282047  | .2709352 | 0.47  | 0.636 | -.4028186 | .6592279  |  |  |  |  |  |  |  |  |
| 4              |  | .4062641  | .3249384 | 1.25  | 0.211 | -.2306034 | 1.043132  |  |  |  |  |  |  |  |  |
| pov            |  |           |          |       |       |           |           |  |  |  |  |  |  |  |  |
| 2              |  | -.3709562 | .1770819 | -2.09 | 0.036 | -.7180304 | -.023882  |  |  |  |  |  |  |  |  |
| 3              |  | -.1575044 | .1847683 | -0.85 | 0.394 | -.5196437 | .2046349  |  |  |  |  |  |  |  |  |
| 4              |  | -.3343985 | .2239073 | -1.49 | 0.135 | -.7732487 | .1044516  |  |  |  |  |  |  |  |  |
| 1.acgge3       |  | -.4383071 | .1501053 | -2.92 | 0.004 | -.7325082 | -.1441061 |  |  |  |  |  |  |  |  |
| 1.female       |  | -.5590774 | .1303571 | -4.29 | 0.000 | -.8145725 | -.3035823 |  |  |  |  |  |  |  |  |
| 1.hypertension |  | -.5754367 | .1414609 | -4.07 | 0.000 | -.852695  | -.2981783 |  |  |  |  |  |  |  |  |
| _cons          |  | -1.530141 | .328384  | -4.66 | 0.000 | -2.173762 | -.8865198 |  |  |  |  |  |  |  |  |
| /lnalpha       |  | .7042579  | .018675  | 37.71 | 0.000 | .6676555  | .7408602  |  |  |  |  |  |  |  |  |
| -----          |  |           |          |       |       |           |           |  |  |  |  |  |  |  |  |
| race           |  |           |          |       |       |           |           |  |  |  |  |  |  |  |  |
| 2              |  | -.1801266 | .2980486 | -0.60 | 0.546 |           |           |  |  |  |  |  |  |  |  |
| 3              |  | .0657322  | .115816  | 0.57  | 0.570 |           |           |  |  |  |  |  |  |  |  |
| 4              |  | -.329598  | .1994938 | -1.65 | 0.098 |           |           |  |  |  |  |  |  |  |  |
| 5              |  | .3360065  | .6071847 | 0.55  | 0.580 |           |           |  |  |  |  |  |  |  |  |
| 2              |  | -.0804313 | .1373037 | -0.59 | 0.558 |           |           |  |  |  |  |  |  |  |  |
| 3              |  | -.3633112 | .2015585 | -1.80 | 0.071 |           |           |  |  |  |  |  |  |  |  |
| 4              |  | -.4397689 | .2440077 | -1.80 | 0.072 |           |           |  |  |  |  |  |  |  |  |
| 2              |  | -.1860765 | .1510164 | -1.23 | 0.218 |           |           |  |  |  |  |  |  |  |  |
| 3              |  | -.1005999 | .155999  | -0.64 | 0.519 |           |           |  |  |  |  |  |  |  |  |
| 4              |  | .1118536  | .1821879 | 0.61  | 0.539 |           |           |  |  |  |  |  |  |  |  |
| 1.acgge3       |  | .7263663  | .1134985 | 6.40  | 0.000 |           |           |  |  |  |  |  |  |  |  |
| 1.female       |  | .1278386  | .1127148 | 1.13  | 0.257 |           |           |  |  |  |  |  |  |  |  |
| 1.hypertension |  | .3321164  | .1110918 | 2.99  | 0.003 |           |           |  |  |  |  |  |  |  |  |
| _cons          |  | 6.942265  | .2962897 | 23.43 | 0.000 |           |           |  |  |  |  |  |  |  |  |
| -----          |  |           |          |       |       |           |           |  |  |  |  |  |  |  |  |
| inflate        |  |           |          |       |       |           |           |  |  |  |  |  |  |  |  |
| yr             |  |           |          |       |       |           |           |  |  |  |  |  |  |  |  |
| 1              |  | -.2329745 | .2469051 | -0.94 | 0.345 |           |           |  |  |  |  |  |  |  |  |
| 2              |  | .4034409  | .2210508 | 1.83  | 0.068 |           |           |  |  |  |  |  |  |  |  |
| 3              |  | .5409364  | .2273057 | 2.38  | 0.017 |           |           |  |  |  |  |  |  |  |  |
| 4              |  | .5714718  | .2266399 | 2.52  | 0.012 |           |           |  |  |  |  |  |  |  |  |
| 1.sg           |  | .036134   | .3753068 | 0.10  | 0.923 |           |           |  |  |  |  |  |  |  |  |
| 1              |  | -.2329745 | .2469051 | -0.94 | 0.345 |           |           |  |  |  |  |  |  |  |  |
| 2              |  | .4034409  | .2210508 | 1.83  | 0.068 |           |           |  |  |  |  |  |  |  |  |
| 3              |  | .5409364  | .2273057 | 2.38  | 0.017 |           |           |  |  |  |  |  |  |  |  |
| 4              |  | .5714718  | .2266399 | 2.52  | 0.012 |           |           |  |  |  |  |  |  |  |  |
| 1.sg           |  | .036134   | .3753068 | 0.10  | 0.923 |           |           |  |  |  |  |  |  |  |  |

|          | alpha     | 2.022345 | .0377673 | 1.949661 | 2.097739 |  |           |           |          |       |         |
|----------|-----------|----------|----------|----------|----------|--|-----------|-----------|----------|-------|---------|
|          | -----     |          |          |          |          |  |           |           |          |       |         |
|          |           |          |          |          |          |  | sg#yr     |           |          |       |         |
| 1.132926 | .5067226  |          |          |          |          |  | 1 1       | -.3131016 | .4182853 | -0.75 | 0.454 - |
| 1.014437 | .4072577  |          |          |          |          |  | 1 2       | -.3035894 | .3626838 | -0.84 | 0.403 - |
| .9102461 | .4816899  |          |          |          |          |  | 1 3       | -.2142781 | .3550922 | -0.60 | 0.546 - |
| 1.137935 | .2908023  |          |          |          |          |  | 1 4       | -.4235666 | .3644806 | -1.16 | 0.245 - |
|          |           |          |          |          |          |  |           |           |          |       |         |
|          |           |          |          |          |          |  | age_group |           |          |       |         |
| 2.494201 | .6023077  |          |          |          |          |  | 2         | -.9459465 | .7899401 | -1.20 | 0.231 - |
| 2.296001 | .6948655  |          |          |          |          |  | 3         | -.8005677 | .7629902 | -1.05 | 0.294 - |
| 1.543327 | 1.376329  |          |          |          |          |  | 4         | -.083499  | .7448239 | -0.11 | 0.911 - |
|          |           |          |          |          |          |  |           |           |          |       |         |
|          |           |          |          |          |          |  | race      |           |          |       |         |
| 1.797584 | .6955142  |          |          |          |          |  | 2         | -.5510348 | .6360061 | -0.87 | 0.386 - |
| .025537  | 1.179459  |          |          |          |          |  | 3         | .5769611  | .3074026 | 1.88  | 0.061 - |
| .2398685 | 2.012113  |          |          |          |          |  | 4         | 1.125991  | .4521116 | 2.49  | 0.013   |
| .3430865 | 2.316762  |          |          |          |          |  | 5         | 1.329924  | .503498  | 2.64  | 0.008   |
|          |           |          |          |          |          |  |           |           |          |       |         |
|          |           |          |          |          |          |  | ed        |           |          |       |         |
| .0099993 | 1.325032  |          |          |          |          |  | 2         | .6575163  | .3405754 | 1.93  | 0.054 - |
| 1.140944 | 1.219058  |          |          |          |          |  | 3         | .039057   | .6020526 | 0.06  | 0.948 - |
| .2131396 | 2.487156  |          |          |          |          |  | 4         | 1.137008  | .6888636 | 1.65  | 0.099 - |
|          |           |          |          |          |          |  |           |           |          |       |         |
|          |           |          |          |          |          |  | pov       |           |          |       |         |
| 2.731179 | -.4378797 |          |          |          |          |  | 2         | -1.584529 | .5850361 | -2.71 | 0.007 - |
| 1.473983 | -.1193391 |          |          |          |          |  | 3         | -.7966613 | .3455789 | -2.31 | 0.021 - |
| 1.926633 | -.044182  |          |          |          |          |  | 4         | -.9854076 | .4802259 | -2.05 | 0.040 - |
|          |           |          |          |          |          |  |           |           |          |       |         |
| 1.531699 | .1127485  |          |          |          |          |  | 1.acgge3  | -.7094753 | .4195096 | -1.69 | 0.091 - |
| 1.341559 | -.1297552 |          |          |          |          |  | 1.female  | -.735657  | .3091392 | -2.38 | 0.017 - |

|                                   |                                                                                                                                                                                                                                                                                                                                                                                                                                                                                                                                                                                                                                                                                                                                                                                                                                                                                                                                                                                                                                                                                                                                                                                                           |                                                                                                                                                                                                                                                                                                                                                                                                                                                                                                                                                                                                                                                                                                                                                         |
|-----------------------------------|-----------------------------------------------------------------------------------------------------------------------------------------------------------------------------------------------------------------------------------------------------------------------------------------------------------------------------------------------------------------------------------------------------------------------------------------------------------------------------------------------------------------------------------------------------------------------------------------------------------------------------------------------------------------------------------------------------------------------------------------------------------------------------------------------------------------------------------------------------------------------------------------------------------------------------------------------------------------------------------------------------------------------------------------------------------------------------------------------------------------------------------------------------------------------------------------------------------|---------------------------------------------------------------------------------------------------------------------------------------------------------------------------------------------------------------------------------------------------------------------------------------------------------------------------------------------------------------------------------------------------------------------------------------------------------------------------------------------------------------------------------------------------------------------------------------------------------------------------------------------------------------------------------------------------------------------------------------------------------|
|                                   |                                                                                                                                                                                                                                                                                                                                                                                                                                                                                                                                                                                                                                                                                                                                                                                                                                                                                                                                                                                                                                                                                                                                                                                                           | <pre> 1.hypertension   -.294141 .2574192 -1.14 0.253 - .7986733 .2103913 _cons   -1.236753 .8514977 -1.45 0.146 - 2.905657 .4321523 -----+----- /lnalpha   .6862978 .0436369 15.73 0.000 .6007712 .7718245 -----+----- alpha   1.986348 .086678 1.823525 2.16371 -----+----- </pre>                                                                                                                                                                                                                                                                                                                                                                                                                                                                     |
| <b>All Other Ambulatory Costs</b> | <pre> -----+----- tot_oth   Robust Coef. Std. Err. z P&gt; z  [95% Conf. Interval] -----+----- tot_oth   yr   1   .1328835 .0840327 1.58 0.114 -.0318176 .2975846 2   .3040801 .102824 2.96 0.003 .1025488 .5056114 3   .2354862 .1288213 1.83 0.068 -.0169988 .4879712 4   .4044952 .1602489 2.52 0.012 .0904131 .7185773 1.sg   .0045127 .0806922 0.06 0.955 -.1536411 .1626665 sg#yr   1 1   -.0022616 .0978418 -0.02 0.982 -.1940279 .1895048 1 2   -.0849259 .1181687 -0.72 0.472 -.3165322 .1466804 1 3   -.0061565 .1471863 -0.04 0.967 -.2946364 .2823233 1 4   -.1131812 .1825824 -0.62 0.535 -.4710361 .2446737 age_group   2   .186165 .1309429 1.42 0.155 -.0704785 .4428084 3   .163543 .1294347 1.26 0.206 -.0901444 .4172303 4   .2624237 .131645 1.99 0.046 .0044041 .5204432 race   2   -.2530714 .121571 -2.08 0.037 -.4913463 -.0147966 3   -.0783434 .056648 -1.38 0.167 -.1893715 .0326846 4   .0577266 .080301 0.72 0.472 -.0996605 .2151136 5   -.2403823 .116447 -2.06 0.039 -.4686142 -.0121504 ed   2   .0434898 .068762 0.63 0.527 -.0912812 .1782609 3   -.0687685 .1018971 -0.67 0.500 -.2684832 .1309461 4   -.1829989 .1717184 -1.07 0.287 -.5195607 .1535629 pov   </pre> | <pre> -----+----- tot_oth   Robust Coef. Std. Err. z P&gt; z  [95% Conf. Interval] -----+----- tot_oth   yr   1   .1155457 .1452339 0.80 0.426 - .1691076 .4001989 2   -.0008273 .1518377 -0.01 0.996 - .2984237 .2967691 3   .1115502 .1484964 0.75 0.453 - .1794975 .4025978 4   .2783599 .156687 1.78 0.076 - .028741 .5854607 1.sg   .2494307 .1595343 1.56 0.118 - .0632507 .5621122 sg#yr   1 1   .0874313 .2003444 0.44 0.663 - .3052364 .4800991 1 2   .02706 .1993163 0.14 0.892 - .3635929 .4177128 1 3   -.132759 .2030408 -0.65 0.513 - .5307116 .2651936 1 4   -.1080049 .1992867 -0.54 0.588 - .4985995 .2825898 age_group   2   .4147111 .1920691 2.16 0.031 .0382626 .7911597 3   .3955258 .1881079 2.10 0.035 .0268411 .7642104 </pre> |



|  |                                                         |  |                                             |
|--|---------------------------------------------------------|--|---------------------------------------------|
|  | /lnalpha   .9271828 .016106 57.57 0.000 .8956156 .95875 |  | 1.sg   .1035984 .2013131 0.51 0.607 -       |
|  | -----+-----                                             |  | .2909679 .4981648                           |
|  | alpha   2.527379 .040706 2.448843 2.608434              |  |                                             |
|  | -----+-----                                             |  | sg#yr                                       |
|  |                                                         |  | 1 1   .2150613 .2853722 0.75 0.451 -        |
|  |                                                         |  | .3442578 .7743805                           |
|  |                                                         |  | 1 2   -.1463518 .2584262 -0.57 0.571 -      |
|  |                                                         |  | .6528578 .3601542                           |
|  |                                                         |  | 1 3   -.1295229 .282584 -0.46 0.647 -       |
|  |                                                         |  | .6833774 .4243316                           |
|  |                                                         |  | 1 4   -.5096681 .2686145 -1.90 0.058 -      |
|  |                                                         |  | 1.036143 .0168067                           |
|  |                                                         |  |                                             |
|  |                                                         |  | age_group                                   |
|  |                                                         |  | 2   -.1155044 .2356348 -0.49 0.624 -        |
|  |                                                         |  | .5773401 .3463313                           |
|  |                                                         |  | 3   -.5258784 .2299602 -2.29 0.022 -        |
|  |                                                         |  | .9765921 -.0751648                          |
|  |                                                         |  | 4   -.8844385 .2428625 -3.64 0.000 -        |
|  |                                                         |  | 1.36044 -.4084368                           |
|  |                                                         |  |                                             |
|  |                                                         |  | race                                        |
|  |                                                         |  | 2   -.1402002 .3365302 -0.42 0.677 -        |
|  |                                                         |  | .7997872 .5193868                           |
|  |                                                         |  | 3   -.0383517 .151313 -0.25 0.800 -         |
|  |                                                         |  | .3349197 .2582162                           |
|  |                                                         |  | 4   -.0506869 .1906497 -0.27 0.790 -        |
|  |                                                         |  | .4243534 .3229797                           |
|  |                                                         |  | 5   .8388189 .5803709 1.45 0.148 -          |
|  |                                                         |  | .2986873 1.976325                           |
|  |                                                         |  |                                             |
|  |                                                         |  | ed                                          |
|  |                                                         |  | 2   .2796787 .2057625 1.36 0.174 -          |
|  |                                                         |  | .1236084 .6829657                           |
|  |                                                         |  | 3   .7161561 .263601 2.72 0.007             |
|  |                                                         |  | .1995076 1.232805                           |
|  |                                                         |  | 4   .9910046 .3820389 2.59 0.009            |
|  |                                                         |  | .2422221 1.739787                           |
|  |                                                         |  |                                             |
|  |                                                         |  | pov                                         |
|  |                                                         |  | 2   .0834436 .1935719 0.43 0.666 -          |
|  |                                                         |  | .2959504 .4628375                           |
|  |                                                         |  | 3   -.2429764 .2043386 -1.19 0.234 -        |
|  |                                                         |  | .6434727 .1575199                           |
|  |                                                         |  | 4   -.2008229 .2613901 -0.77 0.442 -        |
|  |                                                         |  | .7131381 .3114923                           |
|  |                                                         |  |                                             |
|  |                                                         |  | 1.acgge3   -.7665635 .1631335 -4.70 0.000 - |
|  |                                                         |  | 1.086299 -.4468278                          |

|                                           |                                                                                                                                                                                                                                                                                                                                                                                                                                                                                                                                                                                                                                                                                                                                                                                                                                                                                                                                                                                                                                                                                                                                                                                                                            |                                                                                                                                                                                                                                                                                                                                                                                                                                                                                                                                                                                                                                                                                                                                    |
|-------------------------------------------|----------------------------------------------------------------------------------------------------------------------------------------------------------------------------------------------------------------------------------------------------------------------------------------------------------------------------------------------------------------------------------------------------------------------------------------------------------------------------------------------------------------------------------------------------------------------------------------------------------------------------------------------------------------------------------------------------------------------------------------------------------------------------------------------------------------------------------------------------------------------------------------------------------------------------------------------------------------------------------------------------------------------------------------------------------------------------------------------------------------------------------------------------------------------------------------------------------------------------|------------------------------------------------------------------------------------------------------------------------------------------------------------------------------------------------------------------------------------------------------------------------------------------------------------------------------------------------------------------------------------------------------------------------------------------------------------------------------------------------------------------------------------------------------------------------------------------------------------------------------------------------------------------------------------------------------------------------------------|
|                                           |                                                                                                                                                                                                                                                                                                                                                                                                                                                                                                                                                                                                                                                                                                                                                                                                                                                                                                                                                                                                                                                                                                                                                                                                                            | <pre> 1.female   -.2287813 .1436528 -1.59 0.111 - .5103357 .0527731 1.hypertension   -.1552332 .1354429 -1.15 0.252 - .4206964 .11023 _cons   -.520766 .309474 -1.68 0.092 - 1.127324 .0857919 -----+----- /lnalpha   .9070918 .0327283 27.72 0.000 .8429456 .971238 -----+----- alpha   2.477108 .0810715 2.3232 2.641212 -----+----- </pre>                                                                                                                                                                                                                                                                                                                                                                                      |
| <b>Cardiometabolic prescription fills</b> | <pre> -----+----- total_cardioenc_rx   Robust Coef. Std. Err. z P&gt; z  [95% Conf. Interval] -----+----- total_cardioenc_rx   yr   1   -.5720415 .0419706 -13.63 0.000 -.6543024 -.4897806 2   -.4362218 .0485649 -8.98 0.000 -.5314073 -.3410363 3   -.387446 .0591197 -6.55 0.000 -.5033186 -.2715734 4   -.337037 .0731765 -4.61 0.000 -.4804604 -.1936137 1.sg   -.0297384 .0421592 -0.71 0.481 -.1123688 .052892 sg#yr   1 1   .0960093 .0494932 1.94 0.052 -.0009957 .1930143 1 2   .122338 .057152 2.14 0.032 .0103221 .234354 1 3   .1548836 .0709748 2.18 0.029 .0157756 .2939916 1 4   .2286882 .0903698 2.53 0.011 .0515666 .4058098 age_group   2   .3201345 .1429466 2.24 0.025 .0399642 .6003048 3   .4724653 .1403093 3.37 0.001 .1974642 .7474664 4   .7803743 .1396227 5.59 0.000 .5067189 1.05403 race   2   .024822 .0880396 0.28 0.778 -.1477325 .1973765 3   -.0288005 .0426199 -0.68 0.499 -.112334 .0547329 4   -.0587859 .0810716 -0.73 0.468 -.2176833 .1001115 5   -.1376413 .1305167 -1.05 0.292 -.3934493 .1181668 ed   2   .0098426 .0519815 0.19 0.850 -.0920393 .1117246 3   -.1169256 .1012429 -1.15 0.248 -.315358 .0815067 4   -.2434724 .1333183 -1.83 0.068 -.5047714 .0178266 </pre> | <pre> -----+----- total_cardioenc_rx   Robust Coef. Std. Err. z P&gt; z  [95% Conf. Interval] -----+----- total_cardioenc_rx   yr   1   -.6443914 .0935982 -6.88 0.000 - .8278405 -.4609422 2   -.4000552 .0866706 -4.62 0.000 - .5699265 -.2301839 3   -.3114064 .0893663 -3.48 0.000 - .4865611 -.1362518 4   -.2999216 .0937911 -3.20 0.001 - .4837489 -.1160944 1.sg   -.1230045 .0945459 -1.30 0.193 - .308311 .062302 sg#yr   1 1   .0999689 .1216048 0.82 0.411 - .1383722 .33831 1 2   .0274302 .1232089 0.22 0.824 - .2140547 .2689151 1 3   .0296841 .1182737 0.25 0.802 - .2021281 .2614963 1 4   .1128129 .1188975 0.95 0.343 - .1202219 .3458477 age_group   2   .5970131 .291255 2.05 0.040 .0261639 1.167862 </pre> |





|  |                                                              |                                        |
|--|--------------------------------------------------------------|----------------------------------------|
|  | _cons   1.739811 .1917604 9.07 0.000 1.363967 2.115654       | 4   1.040244 .17517 5.94 0.000         |
|  | -----+-----                                                  | .6969171 1.383571                      |
|  | /lnalpha   -.091185 .0363267 -2.51 0.012 -.1623841 -.0199859 |                                        |
|  | -----+-----                                                  | 1.sg   .0612325 .1889616 0.32 0.746 -  |
|  | alpha   .9128488 .0331608 .8501146 .9802125                  | .3091254 .4315904                      |
|  | -----+-----                                                  |                                        |
|  |                                                              | sg#yr                                  |
|  |                                                              | 1 1   -.2230885 .2003395 -1.11 0.265 - |
|  |                                                              | .6157466 .1695696                      |
|  |                                                              | 1 2   -.5055741 .2205843 -2.29 0.022 - |
|  |                                                              | .9379115 -.0732367                     |
|  |                                                              | 1 3   -.5475963 .2210639 -2.48 0.013 - |
|  |                                                              | .9808735 -.114319                      |
|  |                                                              | 1 4   -.4590875 .2306157 -1.99 0.047 - |
|  |                                                              | .9110859 -.0070891                     |
|  |                                                              |                                        |
|  |                                                              | age_group                              |
|  |                                                              | 2   -.2454799 .4150694 -0.59 0.554 -   |
|  |                                                              | 1.059001 .5680411                      |
|  |                                                              | 3   -.8084577 .4006357 -2.02 0.044 -   |
|  |                                                              | 1.593689 -.0232262                     |
|  |                                                              | 4   -1.414036 .4183352 -3.38 0.001 -   |
|  |                                                              | 2.233958 -.594114                      |
|  |                                                              |                                        |
|  |                                                              | race                                   |
|  |                                                              | 2   -1.037323 .5142837 -2.02 0.044 -   |
|  |                                                              | 2.045301 -.029346                      |
|  |                                                              | 3   -.1054047 .1755418 -0.60 0.548 -   |
|  |                                                              | .4494603 .2386509                      |
|  |                                                              | 4   .2907818 .258995 1.12 0.262 -      |
|  |                                                              | .2168391 .7984027                      |
|  |                                                              | 5   -.442834 .5874728 -0.75 0.451 -    |
|  |                                                              | 1.594259 .7085915                      |
|  |                                                              |                                        |
|  |                                                              | ed                                     |
|  |                                                              | 2   .0723159 .2242589 0.32 0.747 -     |
|  |                                                              | .3672234 .5118553                      |
|  |                                                              | 3   .1004796 .3282276 0.31 0.760 -     |
|  |                                                              | .5428346 .7437938                      |
|  |                                                              | 4   -.5136785 .4360541 -1.18 0.239 -   |
|  |                                                              | 1.368329 .3409719                      |
|  |                                                              |                                        |
|  |                                                              | pov                                    |
|  |                                                              | 2   -.2240782 .2338416 -0.96 0.338 -   |
|  |                                                              | .6823992 .2342429                      |
|  |                                                              | 3   -.4974739 .2584438 -1.92 0.054 -   |
|  |                                                              | 1.004014 .0090667                      |
|  |                                                              | 4   -.3696045 .3084531 -1.20 0.231 -   |
|  |                                                              | .9741615 .2349524                      |
|  |                                                              |                                        |

|                              |                                                                                                                                                                                                                                                                                                                                                                                                                                                                                                                                                                                                                                                                                                                                                                                                                                                                                                                                                                                                                                                                                                             |                                                                                                                                                                                                                                                                                                                                                                                                                                                                                                                                                                                                                                                                |
|------------------------------|-------------------------------------------------------------------------------------------------------------------------------------------------------------------------------------------------------------------------------------------------------------------------------------------------------------------------------------------------------------------------------------------------------------------------------------------------------------------------------------------------------------------------------------------------------------------------------------------------------------------------------------------------------------------------------------------------------------------------------------------------------------------------------------------------------------------------------------------------------------------------------------------------------------------------------------------------------------------------------------------------------------------------------------------------------------------------------------------------------------|----------------------------------------------------------------------------------------------------------------------------------------------------------------------------------------------------------------------------------------------------------------------------------------------------------------------------------------------------------------------------------------------------------------------------------------------------------------------------------------------------------------------------------------------------------------------------------------------------------------------------------------------------------------|
|                              |                                                                                                                                                                                                                                                                                                                                                                                                                                                                                                                                                                                                                                                                                                                                                                                                                                                                                                                                                                                                                                                                                                             | <pre> 1.acgge3   -4299097 .1753777 -2.45 0.014 - .7736437 -.0861757 1.female   .0441929 .1793049 0.25 0.805 - .3072382 .3956241 1.hypertension   -1.368524 .1711194 -8.00 0.000 - 1.703912 -1.033136 _cons   1.513165 .4924823 3.07 0.002 .547917 2.478412 -----+----- /lnalpha   -.0701975 .0827267 -0.85 0.396 - .2323388 .0919438 -----+----- alpha   .9322097 .0771186 .7926775 1.096303 -----+----- </pre>                                                                                                                                                                                                                                                |
| All other prescription fills | <pre> -----+----- total_othenc_rx   Robust Coef. Std. Err. z P&gt; z  [95% Conf. Interval] -----+----- total_othenc_rx   yr   1   .0816724 .0314238 2.60 0.009 .0200829 .1432619 2   .121962 .0345389 3.53 0.000 .054267 .189657 3   .1401407 .0412091 3.40 0.001 .0593723 .2209091 4   .1400031 .0547375 2.56 0.011 .0327196 .2472867 1.sg   -.0778051 .0391274 -1.99 0.047 -.1544934 -.0011168 sg#yr   1 1   -.0401884 .0352773 -1.14 0.255 -.1093306 .0289538 1 2   -.0049813 .0396672 -0.13 0.900 -.0827275 .072765 1 3   .0506953 .049527 1.02 0.306 -.0463759 .1477664 1 4   .0458935 .0673021 0.68 0.495 -.0860163 .1778032 age_group   2   .1035895 .0810987 1.28 0.201 -.0553612 .2625401 3   .1481989 .0732503 2.02 0.043 .0046309 .2917669 4   .1583915 .0763847 2.07 0.038 .0086802 .3081028 race   2   -.3539275 .1153996 -3.07 0.002 -.5801067 -.1277484 3   -.0635612 .0414597 -1.53 0.125 -.1448207 .0176984 4   -.1992081 .0849923 -2.34 0.019 -.3657899 -.0326264 5   -.0267711 .1326683 -0.20 0.840 -.2867962 .2332541 ed   2   -.0300408 .0538614 -0.56 0.577 -.1356073 .0755256 </pre> | <pre> -----+----- total_othenc_rx   Robust Coef. Std. Err. z P&gt; z  [95% Conf. Interval] -----+----- total_othenc_rx   yr   1   -.0629567 .0439729 -1.43 0.152 - .149142 .0232285 2   -.0248186 .0436222 -0.57 0.569 - .1103166 .0606793 3   .0756922 .0517872 1.46 0.144 - .0258088 .1771933 4   .1019901 .0480474 2.12 0.034 .0078189 .1961614 1.sg   -.1277545 .0765343 -1.67 0.095 - .277759 .02225 sg#yr   1 1   .1083861 .0589159 1.84 0.066 - .007087 .2238591 1 2   .1076931 .0626598 1.72 0.086 - .0151179 .2305041 1 3   .0482505 .0784301 0.62 0.538 - .1054696 .2019707 1 4   .0778062 .0663707 1.17 0.241 - .052278 .2078904 age_group   </pre> |

|                |           |          |       |       |           |           |          |           |          |       |       |   |
|----------------|-----------|----------|-------|-------|-----------|-----------|----------|-----------|----------|-------|-------|---|
| 3              | -.0405149 | .0679456 | -0.60 | 0.551 | -.1736858 | .092656   | 2        | .2509628  | .1969726 | 1.27  | 0.203 | - |
| 4              | -.0689004 | .1747817 | -0.39 | 0.693 | -.4114662 | .2736654  | .1350964 | .6370221  |          |       |       |   |
|                |           |          |       |       |           |           |          |           |          |       |       |   |
| pov            |           |          |       |       |           |           |          |           |          |       |       |   |
| 2              | .0409036  | .0520795 | 0.79  | 0.432 | -.0611704 | .1429777  | 3        | .4218705  | .1873022 | 2.25  | 0.024 |   |
| 3              | .0828496  | .0489584 | 1.69  | 0.091 | -.0131072 | .1788064  | .0547648 | .7889761  |          |       |       |   |
| 4              | .1090633  | .0625149 | 1.74  | 0.081 | -.0134636 | .2315902  | 4        | .6093695  | .1910221 | 3.19  | 0.001 |   |
|                |           |          |       |       |           |           |          |           |          |       |       |   |
| 1.acgge3       |           |          |       |       |           |           |          |           |          |       |       |   |
| 1.acgge3       | .5049659  | .0397473 | 12.70 | 0.000 | .4270626  | .5828692  |          |           |          |       |       |   |
| 1.female       | .3433663  | .0478769 | 7.17  | 0.000 | .2495293  | .4372032  |          |           |          |       |       |   |
| 1.hypertension | .2150522  | .0406627 | 5.29  | 0.000 | .1353548  | .2947497  |          |           |          |       |       |   |
| _cons          | 1.996967  | .1001747 | 19.93 | 0.000 | 1.800629  | 2.193306  |          |           |          |       |       |   |
| -----+         |           |          |       |       |           |           |          |           |          |       |       |   |
| inflate        |           |          |       |       |           |           |          |           |          |       |       |   |
| yr             |           |          |       |       |           |           |          |           |          |       |       |   |
| 1              | -.6459935 | .37902   | -1.70 | 0.088 | -.1388859 | .096872   | 2        | .0503097  | .3991488 | 0.13  | 0.900 | - |
| 2              | .5553892  | .2031619 | 2.73  | 0.006 | .1571991  | .9535793  | .7320075 | .8326269  |          |       |       |   |
| 3              | .7046318  | .286339  | 2.46  | 0.014 | .1434177  | 1.265846  | 3        | .010314   | .0840216 | 0.12  | 0.902 | - |
| 4              | 1.15882   | .2924896 | 3.96  | 0.000 | .5855506  | 1.732089  | .1543653 | .1749934  |          |       |       |   |
|                |           |          |       |       |           |           |          |           |          |       |       |   |
| 1.sg           |           |          |       |       |           |           |          |           |          |       |       |   |
| 1.sg           | -.1303325 | .2734287 | -0.48 | 0.634 | -.6662428 | .4055779  | 4        | -.3176051 | .164     | -1.94 | 0.053 | - |
|                |           |          |       |       |           |           |          |           |          |       |       |   |
| sg#yr          |           |          |       |       |           |           |          |           |          |       |       |   |
| 1 1            | -.6305943 | .5234051 | -1.20 | 0.228 | -.165645  | .3952609  | .6390393 | .003829   |          |       |       |   |
| 1 2            | .1106097  | .2435814 | 0.45  | 0.650 | -.366801  | .5880203  | .630546  | .4723687  |          |       |       |   |
| 1 3            | .2865241  | .3217175 | 0.89  | 0.373 | -.3440307 | .9170788  |          |           |          |       |       |   |
| 1 4            | -.335936  | .340351  | -0.99 | 0.324 | -1.003012 | .3311398  |          |           |          |       |       |   |
|                |           |          |       |       |           |           |          |           |          |       |       |   |
| age_group      |           |          |       |       |           |           |          |           |          |       |       |   |
| 2              | -.0040118 | .3193076 | -0.01 | 0.990 | -.6298431 | .6218196  |          |           |          |       |       |   |
| 3              | -.2162888 | .323651  | -0.67 | 0.504 | -.8506331 | .4180555  |          |           |          |       |       |   |
| 4              | -.0963203 | .37258   | -0.26 | 0.796 | -.8265637 | .6339231  |          |           |          |       |       |   |
|                |           |          |       |       |           |           |          |           |          |       |       |   |
| race           |           |          |       |       |           |           |          |           |          |       |       |   |
| 2              | .1365004  | .3951741 | 0.35  | 0.730 | -.6380266 | .9110274  | 2        | -.0388467 | .1106601 | -0.35 | 0.726 | - |
| 3              | .3295779  | .1956461 | 1.68  | 0.092 | -.0538814 | .7130371  | .2557365 | .1780432  |          |       |       |   |
| 4              | .3733242  | .2677824 | 1.39  | 0.163 | -.1515197 | .8981682  | 3        | -.1325711 | .1608311 | -0.82 | 0.410 | - |
| 5              | 1.190716  | .6018388 | 1.98  | 0.048 | .0111332  | 2.370298  | .4477942 | .1826519  |          |       |       |   |
|                |           |          |       |       |           |           |          |           |          |       |       |   |
| ed             |           |          |       |       |           |           |          |           |          |       |       |   |
| 2              | .1778447  | .2198933 | 0.81  | 0.419 | -.2531382 | .6088276  |          |           |          |       |       |   |
| 3              | .2303847  | .3179152 | 0.72  | 0.469 | -.3927177 | .8534871  |          |           |          |       |       |   |
| 4              | .3597152  | .3953009 | 0.91  | 0.363 | -.4150604 | 1.134491  |          |           |          |       |       |   |
|                |           |          |       |       |           |           |          |           |          |       |       |   |
| pov            |           |          |       |       |           |           |          |           |          |       |       |   |
| 2              | -.5717947 | .2230399 | -2.56 | 0.010 | -1.008945 | -.1346445 |          |           |          |       |       |   |
| 3              | -.2972768 | .2267087 | -1.31 | 0.190 | -.7416178 | .1470641  |          |           |          |       |       |   |
| 4              | -.4899107 | .2859465 | -1.71 | 0.087 | -1.050355 | .0705341  |          |           |          |       |       |   |
|                |           |          |       |       |           |           |          |           |          |       |       |   |
| 1.acgge3       |           |          |       |       |           |           |          |           |          |       |       |   |
| 1.acgge3       | -.4807394 | .1861319 | -2.58 | 0.010 | -.8455512 | -.1159276 |          |           |          |       |       |   |
| -----+         |           |          |       |       |           |           |          |           |          |       |       |   |
| inflate        |           |          |       |       |           |           |          |           |          |       |       |   |
| yr             |           |          |       |       |           |           |          |           |          |       |       |   |
| 1              | -.1690039 | .5805288 | -0.29 | 0.771 | -         | -         | 1        | -.1690039 | .5805288 | -0.29 | 0.771 | - |
| 2              | .4939856  | .4454221 | 1.11  | 0.267 | -         | -         | 1.306819 | .9688116  |          |       |       |   |
|                |           |          |       |       |           |           |          |           |          |       |       |   |
| 1.acgge3       |           |          |       |       |           |           |          |           |          |       |       |   |
| 1.acgge3       | .4529592  | .0872169 | 5.19  | 0.000 | -         | -         | 2        | .4939856  | .4454221 | 1.11  | 0.267 | - |
|                |           |          |       |       |           |           |          |           |          |       |       |   |
| 1.female       |           |          |       |       |           |           |          |           |          |       |       |   |
| 1.female       | .4045715  | .0953607 | 4.24  | 0.000 | -         | -         | .3790257 | 1.366997  |          |       |       |   |
|                |           |          |       |       |           |           |          |           |          |       |       |   |
| 1.hypertension |           |          |       |       |           |           |          |           |          |       |       |   |
| 1.hypertension | .072492   | .0798054 | 0.91  | 0.364 | -         | -         |          |           |          |       |       |   |
|                |           |          |       |       |           |           |          |           |          |       |       |   |
| _cons          |           |          |       |       |           |           |          |           |          |       |       |   |
| _cons          | 1.722628  | .2089193 | 8.25  | 0.000 | -         | -         |          |           |          |       |       |   |
|                |           |          |       |       |           |           |          |           |          |       |       |   |
| 2.132102       |           |          |       |       |           |           |          |           |          |       |       |   |

|                |           |          |       |       |           |           |
|----------------|-----------|----------|-------|-------|-----------|-----------|
| 1.female       | -7.181844 | .1548145 | -4.64 | 0.000 | -1.021615 | -.4147536 |
| 1.hypertension | -.1248541 | .183845  | -0.68 | 0.497 | -.4851836 | .2354754  |
| _cons          | -1.807443 | .4493793 | -4.02 | 0.000 | -2.688211 | -.9266761 |
| -----          |           |          |       |       |           |           |
| /lnalpha       | -.0235702 | .0281456 | -0.84 | 0.402 | -.0787346 | .0315941  |
| -----          |           |          |       |       |           |           |
| alpha          | .9767054  | .02749   |       |       | .9242852  | 1.032099  |
| -----          |           |          |       |       |           |           |

|          |           |           |          |       |       |   |
|----------|-----------|-----------|----------|-------|-------|---|
|          | 3         | .5232502  | .6128819 | 0.85  | 0.393 | - |
| .6779763 | 1.724477  |           |          |       |       |   |
|          | 4         | .7984331  | .5445071 | 1.47  | 0.143 | - |
| .2687812 | 1.865647  |           |          |       |       |   |
|          | 1.sg      | -.1209306 | .7979716 | -0.15 | 0.880 | - |
| 1.684926 | 1.443065  |           |          |       |       |   |
|          | sg#yr     |           |          |       |       |   |
|          | 1 1       | -.2529622 | .7496304 | -0.34 | 0.736 | - |
| 1.722211 | 1.216286  |           |          |       |       |   |
|          | 1 2       | -.1614765 | .6226769 | -0.26 | 0.795 | - |
| 1.381901 | 1.058948  |           |          |       |       |   |
|          | 1 3       | .3261083  | .8520071 | 0.38  | 0.702 | - |
| 1.343795 | 1.996012  |           |          |       |       |   |
|          | 1 4       | -.2134196 | .727812  | -0.29 | 0.769 | - |
| 1.639905 | 1.213066  |           |          |       |       |   |
|          | age_group |           |          |       |       |   |
|          | 2         | -1.18882  | 2.083057 | -0.57 | 0.568 | - |
| 5.271537 | 2.893896  |           |          |       |       |   |
|          | 3         | -.9656559 | 1.837425 | -0.53 | 0.599 | - |
| 4.566942 | 2.635631  |           |          |       |       |   |
|          | 4         | .1714152  | 1.682551 | 0.10  | 0.919 | - |
| 3.126324 | 3.469154  |           |          |       |       |   |
|          | race      |           |          |       |       |   |
|          | 2         | .0141788  | 1.140098 | 0.01  | 0.990 | - |
| 2.220372 | 2.248729  |           |          |       |       |   |
|          | 3         | 1.004072  | .8958505 | 1.12  | 0.262 | - |
| .7517624 | 2.759907  |           |          |       |       |   |
|          | 4         | 1.305387  | 1.520773 | 0.86  | 0.391 | - |
| 1.675274 | 4.286048  |           |          |       |       |   |
|          | 5         | 2.132026  | 1.00422  | 2.12  | 0.034 | - |
| .1637912 | 4.100261  |           |          |       |       |   |
|          | ed        |           |          |       |       |   |
|          | 2         | .5865318  | .9233091 | 0.64  | 0.525 | - |
| 1.223121 | 2.396184  |           |          |       |       |   |
|          | 3         | -.9330656 | 3.985114 | -0.23 | 0.815 | - |
| 8.743746 | 6.877615  |           |          |       |       |   |
|          | 4         | 1.244529  | 1.578866 | 0.79  | 0.431 | - |
| 1.849992 | 4.33905   |           |          |       |       |   |
|          | pov       |           |          |       |       |   |
|          | 2         | -2.960204 | 2.73054  | -1.08 | 0.278 | - |
| 8.311964 | 2.391557  |           |          |       |       |   |
|          | 3         | -.9508897 | .6088897 | -1.56 | 0.118 | - |
| 2.144292 | .2425121  |           |          |       |       |   |

|                   |                                                                                                                                                                                                                                                                                                                                                                                                                                                                                                                                                                                                                                                                                                                                                                                                                                                                                                                                                                                                                                                      |                                                                                                                                                                                                                                                                                                                                                                                                                                                                                                                                                                                                                                                |
|-------------------|------------------------------------------------------------------------------------------------------------------------------------------------------------------------------------------------------------------------------------------------------------------------------------------------------------------------------------------------------------------------------------------------------------------------------------------------------------------------------------------------------------------------------------------------------------------------------------------------------------------------------------------------------------------------------------------------------------------------------------------------------------------------------------------------------------------------------------------------------------------------------------------------------------------------------------------------------------------------------------------------------------------------------------------------------|------------------------------------------------------------------------------------------------------------------------------------------------------------------------------------------------------------------------------------------------------------------------------------------------------------------------------------------------------------------------------------------------------------------------------------------------------------------------------------------------------------------------------------------------------------------------------------------------------------------------------------------------|
|                   |                                                                                                                                                                                                                                                                                                                                                                                                                                                                                                                                                                                                                                                                                                                                                                                                                                                                                                                                                                                                                                                      | <pre> 4   -1.214739 1.574917 -0.77 0.441 - 4.301519 1.87204   1.acgge3   -1.298763 .8384965 -1.55 0.121 - 2.942186 .3446602 1.female   -1.028256 .5041389 -2.04 0.041 - 2.01635 -.0401624 1.hypertension   .098918 .6453535 0.15 0.878 - 1.165952 1.363788 _cons   -1.605724 1.746445 -0.92 0.358 - 5.028694 1.817245 -----+----- /lnalpha   .0401148 .0958243 0.42 0.675 - .1476973 .2279269 -----+----- alpha   1.04093 .0997464 .8626922 1.255994 -----+----- </pre>                                                                                                                                                                        |
| Specialist visits | <pre> -----+----- total_specenc   Semirobust Coef. Std. Err. z P&gt; z  [95% Conf. Interval] -----+----- yr   1   .4747236 .0342981 13.84 0.000 .4075004 .5419467 2   .3001423 .0406639 7.38 0.000 .2204424 .3798421 3   .1849295 .0497954 3.71 0.000 .0873324 .2825266 4   .0827283 .0509706 1.62 0.105 -.0171722 .1826288   1.sg   .0420778 .0423614 0.99 0.321 -.0409491 .1251047   sg#yr   1 1   -.0751488 .0386073 -1.95 0.052 -.1508177 .0005201 1 2   -.0806045 .0457376 -1.76 0.078 -.1702485 .0090394 1 3   -.1195849 .056954 -2.10 0.036 -.2312127 -.0079572 1 4   .0263774 .0614777 0.43 0.668 -.0941168 .1468715   age_group   2   .0320761 .0649368 0.49 0.621 -.0951977 .1593498 3   .0723751 .0633852 1.14 0.254 -.0518576 .1966079 4   .281371 .0630714 4.46 0.000 .1577533 .4049887   race   2   -.0536032 .0770626 -0.70 0.487 -.2046431 .0974367 3   .0590915 .0359728 1.64 0.100 -.0114139 .1295969 4   -.107693 .060655 -1.78 0.076 -.2265745 .0111886 5   -.0802409 .1272344 -0.63 0.528 -.3296158 .1691339 -----+----- </pre> | <pre> -----+----- total_specenc   Semirobust Coef. Std. Err. z P&gt; z  [95% Conf. Interval] -----+----- yr   1   .404372 .0677432 5.97 0.000 .2715978 .5371461 2   .1752236 .0820223 2.14 0.033 .0144628 .3359844 3   .054375 .0776542 0.70 0.484 - .0978244 .2065745 4   .0236829 .0618048 0.38 0.702 - .0974523 .144818   1.sg   .0527602 .0809265 0.65 0.514 - .1058528 .2113732   sg#yr   1 1   -.0112595 .084247 -0.13 0.894 - .1763805 .1538616 1 2   -.050567 .0964601 -0.52 0.600 - .2396254 .1384914 1 3   -.1060874 .0979784 -1.08 0.279 - .2981215 .0859467 1 4   .057712 .084474 0.68 0.494 - .1078539 .223278 -----+----- </pre> |

|            |                                                                                                                                                                                                                                                                                                                                                                                                                                                                                                                                                    |                                                                                                                                                                                                                                                                                                                                                                                                                                                                                                                                                                                                                                                                                                                                                                                                                                                                                                                                                        |
|------------|----------------------------------------------------------------------------------------------------------------------------------------------------------------------------------------------------------------------------------------------------------------------------------------------------------------------------------------------------------------------------------------------------------------------------------------------------------------------------------------------------------------------------------------------------|--------------------------------------------------------------------------------------------------------------------------------------------------------------------------------------------------------------------------------------------------------------------------------------------------------------------------------------------------------------------------------------------------------------------------------------------------------------------------------------------------------------------------------------------------------------------------------------------------------------------------------------------------------------------------------------------------------------------------------------------------------------------------------------------------------------------------------------------------------------------------------------------------------------------------------------------------------|
|            | <pre> ed   2   -.0477002 .041193 -1.16 0.247 -.128437 .0330367 3   -.1399146 .0654185 -2.14 0.032 -.2681325 -.0116967 4   -.3482297 .1106357 -3.15 0.002 -.5650717 -.1313878   pov   2   -.0393148 .0455691 -0.86 0.388 -.1286286 .049999 3   -.0876918 .0459792 -1.91 0.056 -.1778094 .0024259 4   -.0381741 .057561 -0.66 0.507 -.1509915 .0746433   1.female   .3024765 .0374656 8.07 0.000 .2290452 .3759078 1.hypertension   .183493 .0332848 5.51 0.000 .118256 .2487299 _cons   .2788069 .0804927 3.46 0.001 .1210441 .4365697 ----- </pre> | <pre> age_group   2   .265891 .1371718 1.94 0.053 - .0029608 .5347427 3   .3272 .134248 2.44 0.015 .0640787 .5903212 4   .5049018 .1301832 3.88 0.000 .2497473 .7600563   race   2   .1159701 .2868761 0.40 0.686 - .4462968 .678237 3   -.0245539 .0710196 -0.35 0.730 - .1637497 .114642 4   -.124337 .1163771 -1.07 0.285 - .352432 .103758 5   -.3069899 .3798076 -0.81 0.419 - 1.051399 .4374193   ed   2   .0218082 .0906747 0.24 0.810 - .1559109 .1995274 3   -.4321947 .163942 -2.64 0.008 - .7535152 -.1108743 4   -.5233302 .2288133 -2.29 0.022 - .971796 -.0748644   pov   2   .0307141 .092245 0.33 0.739 - .1500828 .2115111 3   .0788816 .093785 0.84 0.400 - .1049336 .2626969 4   .2012108 .1342111 1.50 0.134 - .0618382 .4642597   1.female   .42261 .0794896 5.32 0.000 .2668133 .5784067 1.hypertension   .1675953 .0675449 2.48 0.013 .0352098 .2999808 _cons   -.1317668 .1900968 -0.69 0.488 - .5043497 .2408161 ----- </pre> |
| PCP visits | <pre> -----   Semirobust total_pcpenc   Coef. Std. Err. z P&gt; z  [95% Conf. Interval] -----+----- yr   1   .0236439 .0250813 0.94 0.346 -.0255145 .0728023 2   -.0559703 .0288469 -1.94 0.052 -.1125091 .0005685 </pre>                                                                                                                                                                                                                                                                                                                          | <pre> -----   Semirobust total_pcpenc   Coef. Std. Err. z P&gt; z  [95% Conf. Interval] -----+----- </pre>                                                                                                                                                                                                                                                                                                                                                                                                                                                                                                                                                                                                                                                                                                                                                                                                                                             |

```

3 | -.1078016 .0372197 -2.90 0.004 -.180751 -.0348522
4 | -.1599189 .0421797 -3.79 0.000 -.2425895 -.0772482
1.sg | -.0210292 .0260818 -0.81 0.420 -.0721485 .0300901
sg#yr |
1 1 | -.0439559 .0287814 -1.53 0.127 -.1003664 .0124547
1 2 | -.0482026 .0334416 -1.44 0.149 -.1137469 .0173416
1 3 | -.039133 .0435136 -0.90 0.368 -.1244181 .046152
1 4 | .0141943 .0511154 0.28 0.781 -.0859901 .1143788
age_group |
2 | .0326058 .057069 0.57 0.568 -.0792474 .144459
3 | .1419268 .0550556 2.58 0.010 .0340198 .2498337
4 | .2218921 .0567502 3.91 0.000 .1106637 .3331205
race |
2 | -.0554974 .0498604 -1.11 0.266 -.153222 .0422273
3 | .0245764 .0245758 1.00 0.317 -.0235912 .0727441
4 | -.0210216 .0466633 -0.45 0.652 -.11248 .0704367
5 | .1697627 .1086749 1.56 0.118 -.0432362 .3827616
ed |
2 | -.0009229 .0278153 -0.03 0.974 -.0554399 .0535941
3 | .0965087 .0486818 1.98 0.047 .001094 .1919233
4 | -.0153658 .0709186 -0.22 0.828 -.1543637 .1236321
pov |
2 | .0160223 .0339499 0.47 0.637 -.0505184 .0825629
3 | -.0213043 .0341208 -0.62 0.532 -.0881798 .0455712
4 | .0035015 .0400793 0.09 0.930 -.0750525 .0820555
1.female | .1193839 .0265603 4.49 0.000 .0673266 .1714412
1.hypertension | .2037003 .0244305 8.34 0.000 .1558175 .2515832
_cons | .2750765 .0682769 4.03 0.000 .1412562 .4088969

```

```

yr |
1 | .0071017 .0468613 0.15 0.880 -
.0847447 .0989482
2 | -.088046 .0489705 -1.80 0.072 -
.1840265 .0079345
3 | -.1733697 .0552584 -3.14 0.002 -
.2816742 -.0650653
4 | -.1913548 .0488025 -3.92 0.000 -
.287006 -.0957037
1.sg | -.0782914 .0514809 -1.52 0.128 -
.1791922 .0226093
sg#yr |
1 1 | .0843866 .0614736 1.37 0.170 -
.0360994 .2048726
1 2 | .0849148 .0648557 1.31 0.190 -
.0422 .2120296
1 3 | .1065939 .0731983 1.46 0.145 -
.0368721 .25006
1 4 | .1439202 .0675368 2.13 0.033
.0115504 .2762899
age_group |
2 | -.1273936 .10738 -1.19 0.235 -
.3378544 .0830673
3 | .0080311 .103251 0.08 0.938 -
.1943371 .2103993
4 | .069285 .1051952 0.66 0.510 -
.1368937 .2754638
race |
2 | -.0477748 .1181047 -0.40 0.686 -
.2792558 .1837062
3 | .0705181 .0416673 1.69 0.091 -
.0111484 .1521846
4 | -.0237542 .0782404 -0.30 0.761 -
.1771026 .1295942
5 | -.4322815 .3115299 -1.39 0.165 -
1.042869 .178306
ed |
2 | .0254795 .0571006 0.45 0.655 -
.0864356 .1373947
3 | .1988378 .0927584 2.14 0.032
.0170347 .3806408
4 | -.1434955 .1316783 -1.09 0.276 -
.4015801 .1145891
pov |

```

|                |                                                                                                                                                                                                                                                                                                                                                                                                                                                                                                                                                                                                                                                                                                                                                                                                                                                                                                                                                                                                                                                                                                                                                                                                                            |                                                                                                                                                                                                                                                                                                                                                                                                                                                                                                                                                                                                                                                                                                                        |
|----------------|----------------------------------------------------------------------------------------------------------------------------------------------------------------------------------------------------------------------------------------------------------------------------------------------------------------------------------------------------------------------------------------------------------------------------------------------------------------------------------------------------------------------------------------------------------------------------------------------------------------------------------------------------------------------------------------------------------------------------------------------------------------------------------------------------------------------------------------------------------------------------------------------------------------------------------------------------------------------------------------------------------------------------------------------------------------------------------------------------------------------------------------------------------------------------------------------------------------------------|------------------------------------------------------------------------------------------------------------------------------------------------------------------------------------------------------------------------------------------------------------------------------------------------------------------------------------------------------------------------------------------------------------------------------------------------------------------------------------------------------------------------------------------------------------------------------------------------------------------------------------------------------------------------------------------------------------------------|
|                |                                                                                                                                                                                                                                                                                                                                                                                                                                                                                                                                                                                                                                                                                                                                                                                                                                                                                                                                                                                                                                                                                                                                                                                                                            | <pre> 2   .0882115 .0543297 1.62 0.104 - .0182726 .1946957 3   .0024154 .0542078 0.04 0.964 - .1038299 .1086607 4   .0597654 .0718439 0.83 0.405 - .081046 .2005768   1.female   .1389992 .0437157 3.18 0.001 .0533179 .2246805 1.hypertension   .145581 .0406572 3.58 0.000 .0658944 .2252676 _cons   .3808013 .1155205 3.30 0.001 .1543852 .6072174 ----- ----- </pre>                                                                                                                                                                                                                                                                                                                                               |
| Nutrition labs | <pre> -----   Robust total_nutrienc_lab   Coef. Std. Err. z P&gt; z  [95% Conf. Interval] -----+----- total_nutrienc_lab   yr   1   1.558986 .083748 18.62 0.000 1.394843 1.723129 2   1.308094 .0901874 14.50 0.000 1.13133 1.484858 3   1.110304 .0948291 11.71 0.000 .9244419 1.296165 4   1.024766 .1099883 9.32 0.000 .8091928 1.240339   1.sg   -.0502992 .0908934 -0.55 0.580 -.2284469 .1278485   sg#yr   1 1   -.0669328 .0962888 -0.70 0.487 -.2556554 .1217897 1 2   -.0678712 .1047814 -0.65 0.517 -.2732391 .1374966 1 3   -.0481238 .1150993 -0.42 0.676 -.2737143 .1774667 1 4   -.1781222 .1361091 -1.31 0.191 -.4448912 .0886468   age_group   2   .0794643 .0765446 1.04 0.299 -.0705604 .2294889 3   .0519786 .0727534 0.71 0.475 -.0906155 .1945726 4   .132348 .0742127 1.78 0.075 -.0131062 .2778021   race   2   .050271 .0638478 0.79 0.431 -.0748683 .1754103 3   .0801825 .0365544 2.19 0.028 .0085373 .1518278 4   .0856064 .0541536 1.58 0.114 -.0205327 .1917456 5   .093392 .1349514 0.69 0.489 -.1711078 .3578919   ed   2   .0025906 .0459127 0.06 0.955 -.0873967 .0925779 3   .0077152 .0725253 0.11 0.915 -.1344318 .1498622 4   .0853736 .1753606 0.49 0.626 -.2583268 .4290741 </pre> | <pre> -----   Robust total_nutrienc_lab   Coef. Std. Err. z P&gt; z  [95% Conf. Interval] -----+----- total_nutrienc_lab   yr   1   1.659241 .1755207 9.45 0.000 1.315226 2.003255 2   1.35931 .18876 7.20 0.000 .9893475 1.729273 3   1.071193 .1938353 5.53 0.000 .6912827 1.451103 4   .825339 .1826911 4.52 0.000 .4672709 1.183407   1.sg   .2124667 .2241863 0.95 0.343 - .2269303 .6518638   sg#yr   1 1   -.2670844 .222487 -1.20 0.230 - .7031509 .1689821 1 2   -.3364203 .2380799 -1.41 0.158 - .8030484 .1302078 1 3   -.3261039 .2512318 -1.30 0.194 - .8185091 .1663013 1 4   -.2702081 .2424069 -1.11 0.265 - .7453169 .2049007   age_group   2   .3682101 .1493957 2.46 0.014 .0753999 .6610203 </pre> |





|                                                                                                                                                           |                                                                                                                                                                                                                                                                                                                                                                                                                                                                                                                                                                                                                                                                                                                                                                                                                                                                                                                                                                                                                                                                                                                                                                                                                                                                              |
|-----------------------------------------------------------------------------------------------------------------------------------------------------------|------------------------------------------------------------------------------------------------------------------------------------------------------------------------------------------------------------------------------------------------------------------------------------------------------------------------------------------------------------------------------------------------------------------------------------------------------------------------------------------------------------------------------------------------------------------------------------------------------------------------------------------------------------------------------------------------------------------------------------------------------------------------------------------------------------------------------------------------------------------------------------------------------------------------------------------------------------------------------------------------------------------------------------------------------------------------------------------------------------------------------------------------------------------------------------------------------------------------------------------------------------------------------|
| -----+-----<br>/lnalpha   -.4475073 .040339 -11.09 0.000 -.5265702 -.3684444<br>-----+-----<br>alpha   .6392196 .0257855 .5906272 .6918097<br>-----+----- | 4   -.6580842 .2509002 -2.62 0.009 -<br>1.14984 -.166329<br> <br>1.sg   .0663003 .2678744 0.25 0.805 -<br>.4587239 .5913244<br> <br>sg#yr  <br>1 1   -.0450823 .3081804 -0.15 0.884 -<br>.6491048 .5589403<br>1 2   -.117627 .3124938 -0.38 0.707 -<br>.7301035 .4948495<br>1 3   -.1912329 .3060321 -0.62 0.532 -<br>.7910448 .408579<br>1 4   .110722 .3165309 0.35 0.726 -<br>.5096671 .7311111<br> <br>age_group  <br>2   .2374371 .2958753 0.80 0.422 -<br>.3424678 .8173421<br>3   -.0088575 .2837447 -0.03 0.975 -<br>.5649869 .5472719<br>4   -.1341311 .3013019 -0.45 0.656 -<br>.724672 .4564098<br> <br>race  <br>2   -.2094821 .2552834 -0.82 0.412 -<br>.7098284 .2908642<br>3   -.2334425 .1506818 -1.55 0.121 -<br>.5287735 .0618885<br>4   -.2594366 .2032634 -1.28 0.202 -<br>.6578254 .1389523<br>5   .4630683 .6262756 0.74 0.460 -<br>.7644093 1.690546<br> <br>ed  <br>2   .3505841 .180673 1.94 0.052 -<br>.0035284 .7046966<br>3   .1573981 .278725 0.56 0.572 -<br>.3888928 .703689<br>4   .2536932 .4709136 0.54 0.590 -<br>.6692805 1.176667<br> <br>pov  <br>2   .0654676 .1775278 0.37 0.712 -<br>.2824804 .4134157<br>3   -.055088 .1813672 -0.30 0.761 -<br>.4105612 .3003852<br>4   -.0893918 .2379396 -0.38 0.707 -<br>.5557449 .3769613<br> |
|-----------------------------------------------------------------------------------------------------------------------------------------------------------|------------------------------------------------------------------------------------------------------------------------------------------------------------------------------------------------------------------------------------------------------------------------------------------------------------------------------------------------------------------------------------------------------------------------------------------------------------------------------------------------------------------------------------------------------------------------------------------------------------------------------------------------------------------------------------------------------------------------------------------------------------------------------------------------------------------------------------------------------------------------------------------------------------------------------------------------------------------------------------------------------------------------------------------------------------------------------------------------------------------------------------------------------------------------------------------------------------------------------------------------------------------------------|

|                |                                                                                                                                                                                                                                                                                                                                                                                                                                                                                                                                                                                                                                                                                                                                                                                                                                                                                                                                                                                                                                                                                                     |                                                                                                                                                                                                                                                                                                                                                                                                                                                                                                                                                                                                                                                    |
|----------------|-----------------------------------------------------------------------------------------------------------------------------------------------------------------------------------------------------------------------------------------------------------------------------------------------------------------------------------------------------------------------------------------------------------------------------------------------------------------------------------------------------------------------------------------------------------------------------------------------------------------------------------------------------------------------------------------------------------------------------------------------------------------------------------------------------------------------------------------------------------------------------------------------------------------------------------------------------------------------------------------------------------------------------------------------------------------------------------------------------|----------------------------------------------------------------------------------------------------------------------------------------------------------------------------------------------------------------------------------------------------------------------------------------------------------------------------------------------------------------------------------------------------------------------------------------------------------------------------------------------------------------------------------------------------------------------------------------------------------------------------------------------------|
|                |                                                                                                                                                                                                                                                                                                                                                                                                                                                                                                                                                                                                                                                                                                                                                                                                                                                                                                                                                                                                                                                                                                     | <pre> 1.acgge3   -.0906855 .1424166 -0.64 0.524 - .3698168 .1884458 1.female   -.3492924 .1417856 -2.46 0.014 - .6271871 -.0713978 1.hypertension   -.2966151 .1280606 -2.32 0.021 - .5476093 -.0456209 _cons   .9722473 .390313 2.49 0.013 .2072479 1.737247 -----+----- /lnalpha   -.6238793 .07877 -7.92 0.000 - .7782657 -.469493 -----+----- alpha   .5358616 .0422098 .4592017 .6253193 -----+----- </pre>                                                                                                                                                                                                                                   |
| All other labs | <pre> -----+----- total_othere   Robust total_othere   Coef. Std. Err. z P&gt; z  [95% Conf. Interval] total_othere   yr   1   .4095288 .0402961 10.16 0.000 .3305498 .4885077 2   .2969019 .0487969 6.08 0.000 .2012618 .392542 3   .2377304 .0549999 4.32 0.000 .1299327 .3455281 4   .2785865 .0846523 3.29 0.001 .1126711 .4445019 1.sg   .0756122 .0427929 1.77 0.077 -.0082603 .1594847 sg#yr   1 1   -.116014 .0475617 -2.44 0.015 -.2092333 -.0227947 1 2   -.1239741 .057903 -2.14 0.032 -.2374618 -.0104863 1 3   -.0379108 .067455 -0.56 0.574 -.1701202 .0942986 1 4   -.014871 .1252323 -0.12 0.905 -.2603219 .2305798 age_group   2   -.092179 .0793509 -1.16 0.245 -.2477038 .0633458 3   -.1084636 .0783361 -1.38 0.166 -.2619995 .0450723 4   -.0298906 .0789958 -0.38 0.705 -.1847195 .1249383 race   2   .1034896 .071985 1.44 0.151 -.0375984 .2445776 3   .0819628 .0327499 2.50 0.012 .0177742 .1461514 4   .196272 .0521308 3.76 0.000 .0940976 .2984465 5   .3539617 .2267067 1.56 0.118 -.0903752 .7982987 ed   2   -.01683 .0427045 -0.39 0.694 -.1005293 .0668692 </pre> | <pre> -----+----- total_othere   Robust total_othere   Coef. Std. Err. z P&gt; z  [95% Conf. Interval] total_othere   yr   1   .4148735 .068661 6.04 0.000 .2803004 .5494466 2   .1937466 .0985285 1.97 0.049 .0006343 .386859 3   .2463891 .1040872 2.37 0.018 .042382 .4503962 4   .1916761 .0797418 2.40 0.016 .035385 .3479671 1.sg   .1993808 .0899473 2.22 0.027 .0230873 .3756744 sg#yr   1 1   -.1346567 .0965533 -1.39 0.163 - .3238978 .0545843 1 2   -.1361159 .1290177 -1.06 0.291 - .388986 .1167541 1 3   -.179441 .1321911 -1.36 0.175 - .4385308 .0796487 1 4   .072428 .1664146 0.44 0.663 - .2537386 .3985946 age_group   </pre> |

|                |           |          |       |       |           |           |          |           |           |          |       |       |   |
|----------------|-----------|----------|-------|-------|-----------|-----------|----------|-----------|-----------|----------|-------|-------|---|
| 3              | .0852573  | .0769677 | 1.11  | 0.268 | -.0655966 | .2361111  | 2        | .1544303  | .1494999  | 1.03     | 0.302 | -     |   |
| 4              | .0919016  | .1093253 | 0.84  | 0.401 | -.122372  | .3061751  | .1385842 | .4474447  |           |          |       |       |   |
|                |           |          |       |       |           |           |          |           |           |          |       |       |   |
| pov            |           |          |       |       |           |           | 3        | .2143755  | .1393518  | 1.54     | 0.124 | -     |   |
| 2              | -.0166834 | .0407475 | -0.41 | 0.682 | -.0965471 | .0631803  | .0587491 | .4875001  |           |          |       |       |   |
| 3              | -.006826  | .0442941 | -0.15 | 0.878 | -.0936409 | .0799888  |          | .2904294  | .1394425  | 2.08     | 0.037 |       |   |
| 4              | -.0026761 | .0559641 | -0.05 | 0.962 | -.1123637 | .1070115  | .017127  | .5637317  |           |          |       |       |   |
|                |           |          |       |       |           |           |          |           |           |          |       |       |   |
| 1.acgge3       |           |          |       |       |           |           | race     |           |           |          |       |       |   |
| 1              | .3152259  | .030675  | 10.28 | 0.000 | .255104   | .3753477  | 2        | .508912   | .2763723  | 1.84     | 0.066 | -     |   |
| 1.hypertension |           |          |       |       |           |           | 1.female |           |           |          |       |       |   |
| 1              | .1023298  | .0378866 | 2.70  | 0.007 | .0280735  | .1765861  | .0327677 | 1.050592  |           |          |       |       |   |
| _cons          |           |          |       |       |           |           | 3        |           |           |          |       |       |   |
| 1              | .0970635  | .0321485 | 3.02  | 0.003 | .0340535  | .1600735  | .0287975 | .3479492  |           |          |       |       |   |
|                |           |          |       |       |           |           |          |           |           |          |       |       |   |
| inflation      |           |          |       |       |           |           | 4        |           |           |          |       |       |   |
| yr             |           |          |       |       |           |           | 2        |           |           |          |       |       |   |
| 1              | -.8127573 | .1724625 | -4.71 | 0.000 | -1.150778 | -.474737  | .0589671 | .4138341  |           |          |       |       |   |
| 2              | -.0587618 | .1461335 | -0.40 | 0.688 | -.3451782 | .2276546  | .8558848 | -.1055026 |           |          |       |       |   |
| 3              | .5186038  | .1545397 | 3.36  | 0.001 | .2157116  | .821496   |          |           |           |          |       |       |   |
| 4              | .5921699  | .1574928 | 3.76  | 0.000 | .2834897  | .9008501  |          |           | ed        |          |       |       |   |
| 1.sg           |           |          |       |       |           |           | 2        |           |           |          |       |       |   |
| 1              | -.1045245 | .1202254 | -0.87 | 0.385 | -.3401619 | .131113   | .2306352 | .1670409  |           |          |       |       |   |
| sg#yr          |           |          |       |       |           |           | 3        |           |           |          |       |       |   |
| 1              | .3311346  | .1891891 | 1.75  | 0.080 | -.0396692 | .7019383  | .4024223 | .1224032  |           |          |       |       |   |
| 2              | .3606118  | .1623481 | 2.22  | 0.026 | .0424154  | .6788083  |          |           |           |          |       |       |   |
| 3              | .1146825  | .1739913 | 0.66  | 0.510 | -.2263342 | .4556991  | .3887239 | .3091728  |           |          |       |       |   |
| 4              | .0705629  | .1851037 | 0.38  | 0.703 | -.2922337 | .4333595  |          |           | pov       |          |       |       |   |
| age_group      |           |          |       |       |           |           | 2        |           |           |          |       |       |   |
| 2              | .1770541  | .1416391 | 1.25  | 0.211 | -.1005533 | .4546616  | .1933657 | .1390199  |           |          |       |       |   |
| 3              | .0236412  | .1369956 | 0.17  | 0.863 | -.2448652 | .2921476  | .0811175 | .2998843  |           |          |       |       |   |
| 4              | -.0954665 | .1510257 | -0.63 | 0.527 | -.3914715 | .2005385  | .016915  | .460713   |           |          |       |       |   |
|                |           |          |       |       |           |           |          |           |           |          |       |       |   |
| race           |           |          |       |       |           |           | 1.acgge3 |           |           |          |       |       |   |
| 2              | -.1160258 | .1921369 | -0.60 | 0.546 | -.4926073 | .2605557  | .2194456 | .4888744  |           |          |       |       |   |
| 3              | -.2830627 | .0902978 | -3.13 | 0.002 | -.4600432 | -.1060823 |          |           |           |          |       |       |   |
| 4              | -.1732908 | .1129073 | -1.53 | 0.125 | -.394585  | .0480034  | .0406212 | .2684144  |           |          |       |       |   |
| 5              | -.0728366 | .2578563 | -0.28 | 0.778 | -.5782256 | .4325524  |          |           | 1.female  |          |       |       |   |
| ed             |           |          |       |       |           |           | 3        |           |           |          |       |       |   |
| 2              | -.019511  | .0960871 | -0.20 | 0.839 | -.2078383 | .1688162  | .1093861 | .1570189  |           |          |       |       |   |
| 3              | .1086972  | .1300727 | 0.84  | 0.403 | -.1462405 | .363635   |          |           |           |          |       |       |   |
| 4              | -.1023472 | .2404819 | -0.43 | 0.670 | -.573683  | .3689886  | .1376909 | 2.080753  |           |          |       |       |   |
|                |           |          |       |       |           |           |          |           |           |          |       |       |   |
| pov            |           |          |       |       |           |           | _cons    |           |           |          |       |       |   |
| 2              | .1130161  | .1022621 | 1.11  | 0.269 | -.0874139 | .3134461  |          |           |           |          |       |       |   |
| 3              | .2762149  | .1061044 | 2.60  | 0.009 | .068254   | .4841758  |          |           | inflation |          |       |       |   |
| 4              | .2867408  | .13384   | 2.14  | 0.032 | .0244192  | .5490625  |          |           | yr        |          |       |       |   |
| 1.acgge3       |           |          |       |       |           |           | 1        |           |           |          |       |       |   |
| 1              | -.2947716 | .0807919 | -3.65 | 0.000 | -.4531209 | -.1364223 | 1.45717  | -.2532992 |           |          |       |       |   |
|                |           |          |       |       |           |           | .3341562 | .5445855  |           |          |       |       |   |
|                |           |          |       |       |           |           |          |           |           |          |       |       |   |
|                |           |          |       |       |           |           |          |           | 2         |          |       |       |   |
|                |           |          |       |       |           |           |          |           | .1052147  | .2241729 | 0.47  | 0.639 | - |



|                        |                                                                                                                                                                                                                                                                                                                                                                                                                                                                                                                                                                                                                                                                                                                                                                                                                                                                                                                                                                                                                                                            |                                                                                                                                                                                                                                                                                                                                                                                                                                                                                                                                                                                                       |
|------------------------|------------------------------------------------------------------------------------------------------------------------------------------------------------------------------------------------------------------------------------------------------------------------------------------------------------------------------------------------------------------------------------------------------------------------------------------------------------------------------------------------------------------------------------------------------------------------------------------------------------------------------------------------------------------------------------------------------------------------------------------------------------------------------------------------------------------------------------------------------------------------------------------------------------------------------------------------------------------------------------------------------------------------------------------------------------|-------------------------------------------------------------------------------------------------------------------------------------------------------------------------------------------------------------------------------------------------------------------------------------------------------------------------------------------------------------------------------------------------------------------------------------------------------------------------------------------------------------------------------------------------------------------------------------------------------|
|                        |                                                                                                                                                                                                                                                                                                                                                                                                                                                                                                                                                                                                                                                                                                                                                                                                                                                                                                                                                                                                                                                            | <pre> 4   .5665763 .2635237 2.15 0.032 .0500794 1.083073   1.acgge3   -.213463 .1852939 -1.15 0.249 - .5766323 .1497063 1.female   -.9189754 .1699088 -5.41 0.000 - 1.251991 -.5859602 1.hypertension   -.2604579 .1694766 -1.54 0.124 - .592626 .0717102 _cons   -1.270162 .4594238 -2.76 0.006 - 2.170616 -.3697079 -----+----- /lnalpha   -.0644311 .0725506 -0.89 0.374 - .2066277 .0777656 -----+----- alpha   .9376007 .0680235 .8133224 1.080869 -----+----- </pre>                                                                                                                            |
| Abdomen/pelvic imaging | <pre> -----+----- total_abdomen_rad   Robust Coef. Std. Err. z P&gt; z  [95% Conf. Interval] -----+----- total_abdomen_rad   yr   1   -.1955557 .1482376 -1.32 0.187 -.4860961 .0949848 2   .2791447 .1522461 1.83 0.067 -.0192522 .5775416 3   .1033478 .1971611 0.52 0.600 -.2830808 .4897764 4   .0938826 .2018527 0.47 0.642 -.3017414 .4895067 1.sg   -.0289865 .145065 -0.20 0.842 -.3133087 .2553358 sg#yr   1 1   -.1371555 .1757271 -0.78 0.435 -.4815744 .2072633 1 2   -.0445835 .1869958 -0.24 0.812 -.4110885 .3219215 1 3   .234846 .2407993 0.98 0.329 -.237112 .706804 1 4   -.1935142 .2505014 -0.77 0.440 -.684488 .2974596 age_group   2   .0021282 .1160366 0.02 0.985 -.2252993 .2295557 3   -.4763485 .1198021 -3.98 0.000 -.7111563 -.2415408 4   -.7347591 .1263717 -5.81 0.000 -.9824432 -.487075 race   2   -.1924545 .1554725 -1.24 0.216 -.4971751 .1122661 3   .0109841 .0672122 0.16 0.870 -.1207494 .1427177 4   -.040195 .1035075 -0.39 0.698 -.2430661 .162676 5   -.067088 .1703378 -0.39 0.694 -.400944 .2667681 </pre> | <pre> -----+----- total_abdomen_rad   Robust [95% Conf. Interval] Coef. Std. Err. z P&gt; z  -----+----- total_abdomen_rad   yr   1   -.3770861 .3668985 -1.03 0.304 - 1.096194 .3420218 2   -.2942656 .3634861 -0.81 0.418 - 1.006685 .4181541 3   -.5569384 .3787335 -1.47 0.141 - 1.299242 .1853656 4   -.6270322 .4036666 -1.55 0.120 - 1.418204 .1641397 1.sg   -.4301078 .3844958 -1.12 0.263 - 1.183706 .3234901 sg#yr   1 1   .354811 .4707111 0.75 0.451 - .5677658 1.277388 1 2   .3804747 .4742564 0.80 0.422 - .5490508 1.31 1 3   .3934004 .4714757 0.83 0.404 - .530675 1.317476 </pre> |

|  |                |           |          |       |       |           |           |  |                                                   |
|--|----------------|-----------|----------|-------|-------|-----------|-----------|--|---------------------------------------------------|
|  |                |           |          |       |       |           |           |  | 1 4   .2054494 .5077698 0.40 0.686 -              |
|  | ed             |           |          |       |       |           |           |  | .7897611 1.20066                                  |
|  | 2              | .0630809  | .0796354 | 0.79  | 0.428 | -.0930016 | .2191633  |  |                                                   |
|  | 3              | -.0376883 | .1582435 | -0.24 | 0.812 | -.3478399 | .2724633  |  |                                                   |
|  | 4              | -.1233699 | .2072678 | -0.60 | 0.552 | -.5296073 | .2828674  |  |                                                   |
|  |                |           |          |       |       |           |           |  | age_group                                         |
|  |                |           |          |       |       |           |           |  | 2   .557008 .3495337 1.59 0.111 -                 |
|  |                |           |          |       |       |           |           |  | .1280655 1.242082                                 |
|  | pov            |           |          |       |       |           |           |  | 3   -.3375811 .3567197 -0.95 0.344 -              |
|  | 2              | .0138857  | .0849084 | 0.16  | 0.870 | -.1525318 | .1803032  |  | 1.036739 .3615767                                 |
|  | 3              | -.01074   | .085744  | -0.13 | 0.900 | -.1787952 | .1573151  |  | 4   -.3837474 .354562 -1.08 0.279 -               |
|  | 4              | .0156542  | .1210685 | 0.13  | 0.897 | -.2216358 | .2529442  |  | 1.078676 .3111813                                 |
|  |                |           |          |       |       |           |           |  | race                                              |
|  | 1.acgge3       | .2297703  | .0715577 | 3.21  | 0.001 | .0895198  | .3700209  |  | 2   .6753875 .3454626 1.96 0.051 -                |
|  | 1.female       | .4384301  | .0988957 | 4.43  | 0.000 | .2445981  | .632262   |  | .0017067 1.352482                                 |
|  | 1.hypertension | -.020365  | .0676494 | -0.30 | 0.763 | -.1529554 | .1122254  |  | 3   -.0276354 .1689963 -0.16 0.870 -              |
|  | _cons          | .1002357  | .2154385 | 0.47  | 0.642 | -.322016  | .5224874  |  | .3588621 .3035912                                 |
|  | -----+-----    |           |          |       |       |           |           |  | 4   .2257692 .2283513 0.99 0.323 -                |
|  | inflate        |           |          |       |       |           |           |  | .2217911 .6733295                                 |
|  |                |           |          |       |       |           |           |  | 5   -.2729298 .7962789 -0.34 0.732 -              |
|  | yr             |           |          |       |       |           |           |  | 1.833608 1.287748                                 |
|  | 1              | -2.661696 | .9726456 | -2.74 | 0.006 | -4.568046 | -.7553455 |  | ed                                                |
|  | 2              | -.3019903 | .2100696 | -1.44 | 0.151 | -.7137191 | .1097386  |  | 2   -.0895842 .1904083 -0.47 0.638 -              |
|  | 3              | -.0620065 | .2502977 | -0.25 | 0.804 | -.552581  | .428568   |  | 3   .0442398 .3550601 0.12 0.901 -                |
|  | 4              | .0496139  | .2537707 | 0.20  | 0.845 | -.4477677 | .5469954  |  | .6516653 .7401449                                 |
|  |                |           |          |       |       |           |           |  | 4   -.3848275 .399338 -0.96 0.335 -               |
|  | 1.sg           | -.2634581 | .1849179 | -1.42 | 0.154 | -.6258904 | .0989743  |  | 1.167516 .3978606                                 |
|  |                |           |          |       |       |           |           |  | pov                                               |
|  | sg#yr          |           |          |       |       |           |           |  | 2   -.0961186 .2626646 -0.37 0.714 -              |
|  | 1 1            | -.9328259 | 1.941494 | -0.48 | 0.631 | -4.738084 | 2.872432  |  | 3   -.0925978 .1839168 -0.50 0.615 -              |
|  | 1 2            | .4513306  | .2500427 | 1.81  | 0.071 | -.0387441 | .9414052  |  | .4530681 .2678726                                 |
|  | 1 3            | .7435599  | .2932645 | 2.54  | 0.011 | .1687721  | 1.318348  |  | 4   .0459773 .2559347 0.18 0.857 -                |
|  | 1 4            | .0624302  | .3318897 | 0.19  | 0.851 | -.5880616 | .712922   |  | .4556455 .5476001                                 |
|  |                |           |          |       |       |           |           |  | 1.acgge3   .1131923 .166953 0.68 0.498 -          |
|  | age_group      |           |          |       |       |           |           |  | .2140296 .4404142                                 |
|  | 2              | .3024211  | .2025958 | 1.49  | 0.136 | -.0946592 | .6995015  |  | 1.female   .5478602 .2461612 2.23 0.026           |
|  | 3              | .4722787  | .2061769 | 2.29  | 0.022 | .0681794  | .876378   |  | .0653932 1.030327                                 |
|  | 4              | .7401905  | .2233259 | 3.31  | 0.001 | .3024798  | 1.177901  |  | 1.hypertension   -.1355869 .1810495 -0.75 0.454 - |
|  |                |           |          |       |       |           |           |  | .4904374 .2192635                                 |
|  | race           |           |          |       |       |           |           |  | _cons   .1451835 .4478017 0.32 0.746 -            |
|  | 2              | .1116444  | .2579813 | 0.43  | 0.665 | -.3939897 | .6172785  |  | .7324917 1.022859                                 |
|  | 3              | .1808536  | .1160929 | 1.56  | 0.119 | -.0466842 | .4083915  |  | -----+-----                                       |
|  | 4              | -.1386314 | .2082358 | -0.67 | 0.506 | -.546766  | .2695032  |  | inflate                                           |
|  | 5              | .1748848  | .3224224 | 0.54  | 0.588 | -.4570516 | .8068211  |  |                                                   |
|  |                |           |          |       |       |           |           |  | yr                                                |
|  | ed             |           |          |       |       |           |           |  |                                                   |
|  | 2              | .1842661  | .1358511 | 1.36  | 0.175 | -.0819972 | .4505294  |  |                                                   |
|  | 3              | .0114366  | .2499639 | 0.05  | 0.964 | -.4784836 | .5013569  |  |                                                   |
|  | 4              | .2939916  | .3763352 | 0.78  | 0.435 | -.4436119 | 1.031595  |  |                                                   |
|  |                |           |          |       |       |           |           |  |                                                   |
|  | pov            |           |          |       |       |           |           |  |                                                   |
|  | 2              | -.0676816 | .1494998 | -0.45 | 0.651 | -.3606958 | .2253325  |  |                                                   |
|  | 3              | -.1026687 | .1493343 | -0.69 | 0.492 | -.3953585 | .190021   |  |                                                   |

|  |                                                                    |  |                                        |
|--|--------------------------------------------------------------------|--|----------------------------------------|
|  | 4   -2108849 .2208695 -0.95 0.340 -.6437811 .2220114               |  | 1   -1.460028 .7154003 -2.04 0.041 -   |
|  |                                                                    |  | 2.862187 -.0578694                     |
|  | 1.acgge3   -.4641795 .1285757 -3.61 0.000 -.7161832 -.2121758      |  | 2   -.1933092 .4957911 -0.39 0.697 -   |
|  | 1.female   -.8243302 .145736 -5.66 0.000 -1.109968 -.5386928       |  | 1.165042 .7784234                      |
|  | 1.hypertension   -.3119441 .1177155 -2.65 0.008 -.5426622 -.081226 |  | 3   -.3782036 .5882908 -0.64 0.520 -   |
|  | _cons   .7209514 .3388766 2.13 0.033 .0567654 1.385137             |  | 1.531232 .7748252                      |
|  | -----+-----                                                        |  | 4   -.2806862 .587517 -0.48 0.633 -    |
|  | /lnalpha   .8754131 .09037 9.69 0.000 .6982913 1.052535            |  | 1.432198 .8708259                      |
|  | -----+-----                                                        |  |                                        |
|  | alpha   2.399867 .2168759 2.010315 2.864904                        |  | 1.sg   -.189997 .6041236 -0.31 0.753 - |
|  | -----+-----                                                        |  | 1.374058 .9940635                      |
|  |                                                                    |  |                                        |
|  |                                                                    |  | sg#yr                                  |
|  |                                                                    |  | 1 1   -.9475196 2.316719 -0.41 0.683 - |
|  |                                                                    |  | 5.488205 3.593166                      |
|  |                                                                    |  | 1 2   .1330086 .7938184 0.17 0.867 -   |
|  |                                                                    |  | 1.422847 1.688864                      |
|  |                                                                    |  | 1 3   .6734185 .8118058 0.83 0.407 -   |
|  |                                                                    |  | .9176917 2.264529                      |
|  |                                                                    |  | 1 4   -1.216738 1.317379 -0.92 0.356 - |
|  |                                                                    |  | 3.798753 1.365277                      |
|  |                                                                    |  |                                        |
|  |                                                                    |  | age_group                              |
|  |                                                                    |  | 2   1.027238 .9856948 1.04 0.297 -     |
|  |                                                                    |  | .9046883 2.959164                      |
|  |                                                                    |  | 3   .1812561 1.098274 0.17 0.869 -     |
|  |                                                                    |  | 1.971322 2.333834                      |
|  |                                                                    |  | 4   .94006 1.031286 0.91 0.362 -       |
|  |                                                                    |  | 1.081224 2.961344                      |
|  |                                                                    |  |                                        |
|  |                                                                    |  | race                                   |
|  |                                                                    |  | 2   .472357 .7147267 0.66 0.509 -      |
|  |                                                                    |  | .9284817 1.873196                      |
|  |                                                                    |  | 3   -.2528133 .4685397 -0.54 0.589 -   |
|  |                                                                    |  | 1.171134 .6655077                      |
|  |                                                                    |  | 4   .5083793 .3971742 1.28 0.201 -     |
|  |                                                                    |  | .2700678 1.286826                      |
|  |                                                                    |  | 5   1.564577 1.274361 1.23 0.220 -     |
|  |                                                                    |  | .9331244 4.062278                      |
|  |                                                                    |  |                                        |
|  |                                                                    |  | ed                                     |
|  |                                                                    |  | 2   .1731931 .4248122 0.41 0.683 -     |
|  |                                                                    |  | .6594235 1.00581                       |
|  |                                                                    |  | 3   1.247486 .646371 1.93 0.054 -      |
|  |                                                                    |  | .019378 2.51435                        |
|  |                                                                    |  | 4   -.2446681 1.014291 -0.24 0.809 -   |
|  |                                                                    |  | 2.232642 1.743306                      |
|  |                                                                    |  |                                        |
|  |                                                                    |  | pov                                    |



|                   |                                                                                                                                                                                                                                                                                                                                                                                                                                                                                                                                                                                                                                                                                                                                                                                                                            |                                                                                                                                                                                                                                                                                                                                                                                                                                                                                                                                                                               |
|-------------------|----------------------------------------------------------------------------------------------------------------------------------------------------------------------------------------------------------------------------------------------------------------------------------------------------------------------------------------------------------------------------------------------------------------------------------------------------------------------------------------------------------------------------------------------------------------------------------------------------------------------------------------------------------------------------------------------------------------------------------------------------------------------------------------------------------------------------|-------------------------------------------------------------------------------------------------------------------------------------------------------------------------------------------------------------------------------------------------------------------------------------------------------------------------------------------------------------------------------------------------------------------------------------------------------------------------------------------------------------------------------------------------------------------------------|
|                   |                                                                                                                                                                                                                                                                                                                                                                                                                                                                                                                                                                                                                                                                                                                                                                                                                            | <pre> 2   -3886233 .5700626 -0.68 0.495 - 1.505925 .7286788 3   -1.128957 .531611 -2.12 0.034 - 2.170895 -.0870183 4   -5.109999 .6143795 -0.83 0.406 - 1.715162 .6931618   1.acgge3   -.6081891 .4441937 -1.37 0.171 - 1.478793 .2624144 1.female   -.3411348 .6038288 -0.56 0.572 - 1.524618 .8423479 1.hypertension   -.2855956 .4094547 -0.70 0.485 - 1.088112 .5169208 _cons   .125618 1.150809 0.11 0.913 - 2.129925 2.381161 -----+----- /lnalpha   1.029773 .1608771 6.40 0.000 .7144595 1.345086 -----+----- alpha   2.80043 .4505251 2.043082 3.838517 ----- </pre> |
| All other imaging | <pre> -----+----- total_other_rad   Robust Coef. Std. Err. z P&gt; z  [95% Conf. Interval] -----+----- total_other_rad   yr   1   -.0379002 .0622005 -0.61 0.542 -.1598109 .0840106 2   .0398072 .0663583 0.60 0.549 -.0902527 .169867 3   .1324769 .0762029 1.74 0.082 -.0168781 .2818319 4   .1828783 .0767969 2.38 0.017 .032359 .3333975   1.sg   .0040713 .0532781 0.08 0.939 -.100352 .1084945   sg#yr   1 1   .0194712 .071259 0.27 0.785 -.1201938 .1591362 1 2   .1051079 .0752471 1.40 0.162 -.0423736 .2525894 1 3   .11319 .0935499 1.21 0.226 -.0701644 .2965444 1 4   .1096833 .0966688 1.13 0.257 -.0797841 .2991506   age_group   2   .3760606 .0913967 4.11 0.000 .1969263 .5551949 3   .5220962 .0828653 6.30 0.000 .3596831 .6845093 4   .7297252 .0849387 8.59 0.000 .5632483 .8962021   race   </pre> | <pre> -----+----- total_other_rad   Robust Coef. Std. Err. z P&gt; z  [95% Conf. Interval] -----+----- total_other_rad   yr   1   -.0425677 .0859381 -0.50 0.620 - .2110033 .1258679 2   -.0413477 .0939453 -0.44 0.660 - .2254771 .1427816 3   .0043744 .0798881 0.05 0.956 - .1522035 .1609522 4   .087672 .0914481 0.96 0.338 - .091563 .266907   1.sg   .0271132 .09187 0.30 0.768 - .1529487 .2071751   sg#yr   1 1   .0069314 .1235316 0.06 0.955 - .2351861 .249049 </pre>                                                                                             |

|         |                |           |          |       |       |           |           |          |                |            |          |       |       |         |
|---------|----------------|-----------|----------|-------|-------|-----------|-----------|----------|----------------|------------|----------|-------|-------|---------|
|         | 2              | -.0793666 | .0872523 | -0.91 | 0.363 | -.250378  | .0916448  |          | 1 2            | .0118572   | .1257575 | 0.09  | 0.925 | -       |
|         | 3              | -.0753587 | .0393573 | -1.91 | 0.056 | -.1524976 | .0017802  | .2346229 | .2583373       |            |          |       |       |         |
|         | 4              | -.1118873 | .0577348 | -1.94 | 0.053 | -.2250454 | .0012708  |          | 1 3            | .0378931   | .119397  | 0.32  | 0.751 | -       |
|         | 5              | -.1790106 | .1093398 | -1.64 | 0.102 | -.3933126 | .0352914  | .1961207 | .2719069       |            |          |       |       |         |
|         |                |           |          |       |       |           |           |          | 1 4            | .0247047   | .1266488 | 0.20  | 0.845 | -       |
|         | ed             |           |          |       |       |           |           | .2235223 | .2729317       |            |          |       |       |         |
|         | 2              | .0149535  | .0507005 | 0.29  | 0.768 | -.0844176 | .1143247  |          |                |            |          |       |       |         |
|         | 3              | -.0710783 | .0608643 | -1.17 | 0.243 | -.1903701 | .0482135  |          | age_group      |            |          |       |       |         |
|         | 4              | -.030884  | .1395554 | -0.22 | 0.825 | -.3044076 | .2426396  |          | 2              | .6737685   | .237     | 2.84  | 0.004 | .209257 |
|         |                |           |          |       |       |           |           | 1.13828  |                |            |          |       |       |         |
|         | pov            |           |          |       |       |           |           |          | 3              | .9024551   | .239862  | 3.76  | 0.000 |         |
|         | 2              | .0827759  | .048277  | 1.71  | 0.086 | -.0118453 | .1773971  | .4323341 | 1.372576       |            |          |       |       |         |
|         | 3              | .1429467  | .0470154 | 3.04  | 0.002 | .0507983  | .2350951  |          | 4              | .1.100449  | .2385826 | 4.61  | 0.000 |         |
|         | 4              | .1655348  | .0605408 | 2.73  | 0.006 | .0468769  | .2841926  | .6328353 | 1.568062       |            |          |       |       |         |
|         |                |           |          |       |       |           |           |          |                |            |          |       |       |         |
|         | 1.acgge3       | .3178294  | .0337396 | 9.42  | 0.000 | .251701   | .3839577  |          | race           |            |          |       |       |         |
|         | 1.female       | .4084991  | .0497948 | 8.20  | 0.000 | .3109032  | .5060951  |          | 2              | .2827378   | .2569843 | 1.10  | 0.271 | -       |
|         | 1.hypertension | .1209183  | .0361493 | 3.34  | 0.001 | .0500671  | .1917696  | .2209421 | .7864178       |            |          |       |       |         |
|         | _cons          | .2434356  | .1137372 | 2.14  | 0.032 | .0205147  | .4663566  | .1582059 | .1112902       |            |          |       |       |         |
|         |                |           |          |       |       |           |           |          | 3              | -0.0234579 | .0687502 | -0.34 | 0.733 | -       |
| inflate |                |           |          |       |       |           |           |          | 4              | -0.023985  | .1032952 | -0.23 | 0.816 | -       |
|         | yr             |           |          |       |       |           |           | .2264398 | .1784698       |            |          |       |       |         |
|         | 1              | -.0732541 | .1469905 | -0.50 | 0.618 | -.3613502 | .214842   |          | 5              | -0.2219829 | .3027519 | -0.73 | 0.463 | -       |
|         | 2              | .2456098  | .1324116 | 1.85  | 0.064 | -.013912  | .5051317  | .8153657 | .3713999       |            |          |       |       |         |
|         | 3              | .5382672  | .1654236 | 3.25  | 0.001 | .2140428  | .8624915  |          |                |            |          |       |       |         |
|         | 4              | .396837   | .1839154 | 2.16  | 0.031 | .0363695  | .7573045  |          | ed             |            |          |       |       |         |
|         |                |           |          |       |       |           |           |          | 2              | .0257687   | .0873655 | 0.29  | 0.768 | -       |
|         | 1.sg           | .0169837  | .1250122 | 0.14  | 0.892 | -.2280357 | .2620031  | .1454645 | .1970018       |            |          |       |       |         |
|         |                |           |          |       |       |           |           |          | 3              | -0.0821178 | .0991588 | -0.83 | 0.408 | -       |
|         | sg#yr          |           |          |       |       |           |           | .2764656 | .11223         |            |          |       |       |         |
|         | 1 1            | -.0318984 | .1668513 | -0.19 | 0.848 | -.3589208 | .2951241  |          | 4              | -0.384681  | .1771849 | -2.17 | 0.030 | -       |
|         | 1 2            | .1564648  | .1526964 | 1.02  | 0.306 | -.1428146 | .4557442  | .7319569 | -.037405       |            |          |       |       |         |
|         | 1 3            | -.0649259 | .1876706 | -0.35 | 0.729 | -.4327534 | .3029016  |          |                |            |          |       |       |         |
|         | 1 4            | .0744849  | .2122038 | 0.35  | 0.726 | -.3414269 | .4903968  |          | pov            |            |          |       |       |         |
|         |                |           |          |       |       |           |           |          | 2              | .0004689   | .0896229 | 0.01  | 0.996 | -       |
|         | age_group      |           |          |       |       |           |           | .1751888 | .1761266       |            |          |       |       |         |
|         | 2              | .1510374  | .1520753 | 0.99  | 0.321 | -.1470247 | .4490994  |          | 3              | .167358    | .0897601 | 1.86  | 0.062 | -       |
|         | 3              | -.4830356 | .148784  | -3.25 | 0.001 | -.7746469 | -.1914243 | .0085686 | .3432847       |            |          |       |       |         |
|         | 4              | -.6764059 | .1582875 | -4.27 | 0.000 | -.9866438 | -.3661681 |          | 4              | .2772439   | .1097998 | 2.52  | 0.012 |         |
|         |                |           |          |       |       |           |           | .0620402 | .4924476       |            |          |       |       |         |
|         | race           |           |          |       |       |           |           |          |                |            |          |       |       |         |
|         | 2              | .0750496  | .2284712 | 0.33  | 0.743 | -.3727458 | .522845   |          | 1.acgge3       | .4105169   | .0650012 | 6.32  | 0.000 |         |
|         | 3              | -.0420216 | .0877622 | -0.48 | 0.632 | -.2140324 | .1299892  | .283117  | .5379168       |            |          |       |       |         |
|         | 4              | .0069411  | .1244268 | 0.06  | 0.956 | -.236931  | .2508133  |          | 1.female       | .5195116   | .0788069 | 6.59  | 0.000 |         |
|         | 5              | .1996168  | .2727378 | 0.73  | 0.464 | -.3349394 | .734173   | .365053  | .6739702       |            |          |       |       |         |
|         |                |           |          |       |       |           |           |          | 1.hypertension | .0825699   | .0654193 | 1.26  | 0.207 | -       |
|         | ed             |           |          |       |       |           |           | .0456495 | .2107893       |            |          |       |       |         |
|         | 2              | -.0380572 | .1112456 | -0.34 | 0.732 | -.2560947 | .1799802  |          | _cons          | -.2616713  | .2670422 | -0.98 | 0.327 | -       |
|         | 3              | -.0173422 | .1484819 | -0.12 | 0.907 | -.3083614 | .2736769  | .7850643 | .2617218       |            |          |       |       |         |
|         | 4              | .0435651  | .2265942 | 0.19  | 0.848 | -.4005514 | .4876815  |          |                |            |          |       |       |         |

|  |                                                                                                                                                                                                                                                                                                                                                                                                                                                                                                                                                                                    |                                                                                                                                                                                                                                                                                                                                                                                                                                                                                                                                                                                                                                                                                                                                                                                                                                                                                                                                                                                                                                                                              |
|--|------------------------------------------------------------------------------------------------------------------------------------------------------------------------------------------------------------------------------------------------------------------------------------------------------------------------------------------------------------------------------------------------------------------------------------------------------------------------------------------------------------------------------------------------------------------------------------|------------------------------------------------------------------------------------------------------------------------------------------------------------------------------------------------------------------------------------------------------------------------------------------------------------------------------------------------------------------------------------------------------------------------------------------------------------------------------------------------------------------------------------------------------------------------------------------------------------------------------------------------------------------------------------------------------------------------------------------------------------------------------------------------------------------------------------------------------------------------------------------------------------------------------------------------------------------------------------------------------------------------------------------------------------------------------|
|  | <pre> pov   2   .0240829 .1023607 0.24 0.814 -.1765404 .2247063 3   .0004172 .1031103 0.00 0.997 -.2016753 .2025097 4   -.0144732 .1356775 -0.11 0.915 -.2803963 .2514499  1.acg3   -.5744171 .0787924 -7.29 0.000 -.7288472 -.4199869 1.female   -1.010101 .0879681 -11.48 0.000 -1.182515 -.8376864 1.hypertension   -.2450277 .0786258 -3.12 0.002 -.3991315 -.0909239 _cons   .4584943 .1965485 2.33 0.020 .0732664 .8437223 -----+----- /lalpha   -.2616188 .0513702 -5.09 0.000 -.3623026 -.160935 -----+----- alpha   .7698044 .039545 .6960717 .8513474 -----+----- </pre> | <pre> -----+----- inflate   yr   1   .0495726 .2355439 0.21 0.833 - .412085 .5112301 2   .109554 .2362517 0.46 0.643 - .3534908 .5725989 3   .252766 .235063 1.08 0.282 - .207949 .713481 4   .0635375 .2574814 0.25 0.805 - .4411167 .5681917 1.sg   .1004787 .2579158 0.39 0.697 - .4050269 .6059843 sg#yr   1 1   -.3976554 .3361245 -1.18 0.237 - 1.056447 .2611365 1 2   -.0863065 .3217016 -0.27 0.788 - .7168301 .544217 1 3   -.2370975 .3278396 -0.72 0.470 - .8796513 .4054563 1 4   -.2523936 .3415005 -0.74 0.460 - .9217222 .416935 age_group   2   .8721561 .6170966 1.41 0.158 - .3373311 2.081643 3   -.158068 .6323591 -0.25 0.803 - 1.397469 1.081333 4   -.3161012 .6342747 -0.50 0.618 - 1.559257 .9270543 race   2   .1306915 .3634339 0.36 0.719 - .5816258 .8430088 3   .1176487 .1831661 0.64 0.521 - .2413502 .4766475 4   -.0550087 .2556491 -0.22 0.830 - .5560718 .4460544 5   .9091766 .4211653 2.16 0.031 .0837077 1.734645 ed   2   .0346757 .2029396 0.17 0.864 - .3630786 .43243 3   .1384436 .323627 0.43 0.669 - .4958536 .7727408 </pre> |
|--|------------------------------------------------------------------------------------------------------------------------------------------------------------------------------------------------------------------------------------------------------------------------------------------------------------------------------------------------------------------------------------------------------------------------------------------------------------------------------------------------------------------------------------------------------------------------------------|------------------------------------------------------------------------------------------------------------------------------------------------------------------------------------------------------------------------------------------------------------------------------------------------------------------------------------------------------------------------------------------------------------------------------------------------------------------------------------------------------------------------------------------------------------------------------------------------------------------------------------------------------------------------------------------------------------------------------------------------------------------------------------------------------------------------------------------------------------------------------------------------------------------------------------------------------------------------------------------------------------------------------------------------------------------------------|

|  |  |                                                                                                                                                                                                                                                                                                                                                                                                                                                                                                                                                                                                                                                          |
|--|--|----------------------------------------------------------------------------------------------------------------------------------------------------------------------------------------------------------------------------------------------------------------------------------------------------------------------------------------------------------------------------------------------------------------------------------------------------------------------------------------------------------------------------------------------------------------------------------------------------------------------------------------------------------|
|  |  | <pre> 4   -3354283 .6525974 -0.51 0.607 - 1.614496 .9436391   pov   2   -2746414 .2329163 -1.18 0.238 - .731149 .1818662 3   -4142622 .2385675 -1.74 0.082 - .8818459 .0533214 4   -1818734 .3037588 -0.60 0.549 - .7772296 .4134828   1.acgge3   -3597876 .1653958 -2.18 0.030 - .6839574 -.0356178 1.female   -1.22646 .1526042 -8.04 0.000 - 1.525559 -.9273612 1.hypertension   -.1687529 .1666045 -1.01 0.311 - .4952918 .1577859 _cons   .1450575 .6495473 0.22 0.823 - 1.128032 1.418147 -----+-----   /lnalpha   -.4301555 .0808482 -5.32 0.000 - .5886151 -.271696 -----+-----   alpha   .6504079 .0525843 .5550955 .7620859 -----+----- </pre> |
|--|--|----------------------------------------------------------------------------------------------------------------------------------------------------------------------------------------------------------------------------------------------------------------------------------------------------------------------------------------------------------------------------------------------------------------------------------------------------------------------------------------------------------------------------------------------------------------------------------------------------------------------------------------------------------|

**eTable 9: STATA outputs for all models**

a. The zero-inflated negative binomial model regression outputs were extracted directly from the STATA 17 log files. For each outcome, the coefficients for both the inflated part and main part of the model were provided. Negative binomial models were used for PCP and specialist visits due to convergence issues

| <b>eTable 10. Final Time Series Model After Backward Variable Selection for the Differenced Outcomes Between SG and RYBG<sup>a</sup></b> |                 |                   |                |                              |                              |
|------------------------------------------------------------------------------------------------------------------------------------------|-----------------|-------------------|----------------|------------------------------|------------------------------|
| <b>Outcome Measure</b>                                                                                                                   | <b>Variable</b> | <b>Estimate</b>   | <b>P-value</b> | <b>Lower limit of 95% CI</b> | <b>Upper limit of 95% CI</b> |
| Total Ambulatory Costs                                                                                                                   | Intercept       | -1.186254284      | 0.959460108    | -69.59506368                 | 67.22255511                  |
|                                                                                                                                          | trend           | <i>Eliminated</i> |                |                              |                              |
| Laboratory Costs                                                                                                                         | Intercept       | 8.53756081        | 0.005261583    | 4.826914892                  | 12.24820673                  |
|                                                                                                                                          | trend           | <i>Eliminated</i> |                |                              |                              |
| Office Visit Costs                                                                                                                       | Intercept       | 1.484189963       | 0.728178844    | -10.89341035                 | 13.86179028                  |
|                                                                                                                                          | trend           | <i>Eliminated</i> |                |                              |                              |
| Radiology Costs                                                                                                                          | Intercept       | 7.577394754       | 0.514911946    | -25.17494862                 | 40.32973813                  |
|                                                                                                                                          | trend           | <i>Eliminated</i> |                |                              |                              |
| Prescription Costs                                                                                                                       | Intercept       | -36.49429201      | 0.058274095    | -75.37761809                 | 2.389034073                  |
|                                                                                                                                          | trend           | <i>Eliminated</i> |                |                              |                              |
| All Other outpatient Costs                                                                                                               | Intercept       | 17.7088922        | 0.719825331    | -125.2809275                 | 160.6987119                  |
|                                                                                                                                          | trend           | <i>Eliminated</i> |                |                              |                              |

**eTable 10: Final Time Series Model After Backward Variable Selection for the Differenced Outcomes between SG and RYGB – Checking for Parallel Trends**  
a. We used backward variable selection with a cutoff of p-value at 0.05 for the time series models. All models started with both intercept and trend(i.e. quarter). Intercept was kept in the final model regardless of the p-value. As shown in the output, the trend term was eliminated from all models, providing evidence of parallel trend for all outcomes.

## eReferences.

1. Smith LH, VanderWeele TJ. Bounding Bias Due to Selection. *Epidemiology*. 2019;30(4):509-516. doi:10.1097/EDE.0000000000001032
2. Mathur MB, VanderWeele TJ. Sensitivity Analysis for Unmeasured Confounding in Meta-Analyses. *J Am Stat Assoc*. 2020;115(529):163-172. doi:10.1080/01621459.2018.1529598
3. VanderWeele TJ, Ding P. Sensitivity Analysis in Observational Research: Introducing the E-Value. *Ann Intern Med*. 2017;167(4):268-274. doi:10.7326/M16-2607
